# Supplementary material for: Design, synthesis, docking, ADMET and anticancer evaluations of N-alkyl substituted iodoquinazoline derivatives as dual VEGFR-2 and EGFR inhibitors
Source: Royal Society of Chemistry journal article supplement (doi:10.1039/d3ra07700d), 2023-01-01

# Design, Synthesis, Docking, ADMET and Anticancer Evaluations of *N*-Alkyl Substituted Iodoquinazoline Derivatives as Dual VEGFR-2 and EGFR Inhibitors

Marwa Alsulaimany<sup>1</sup>, Khaled El-Adl<sup>2,3,\*</sup>, Ahmed K. B. Aljohani<sup>4</sup>, Hussam Y. Alharbi<sup>5</sup>, Omar M. Alatawi<sup>6</sup>, Majed S. Aljohani<sup>5</sup>, Ahmed El-morsy<sup>7</sup>, Sara A. Almadani<sup>8</sup>, Abdulrahman A. Alsimaree<sup>9</sup>, Samir A. Salama<sup>10</sup>, Doaa E. Keshek<sup>11,12</sup>, and Abeer A. Mohamed<sup>3,13</sup>

<sup>1</sup>College of Pharmacy, Department of Pharmacognosy & Pharmaceutical Chemistry, Taibah University, Medina, 42353, Saudi Arabia

<sup>2</sup>Pharmaceutical Medicinal Chemistry and Drug Design Department, Faculty of Pharmacy (Boys), Al-Azhar University, Nasr City 11884, Cairo, Egypt

<sup>3</sup>Chemistry Department, Faculty of Pharmacy, Heliopolis University for Sustainable Development, Cairo, Egypt

<sup>4</sup>Pharmacognosy and Pharmaceutical Chemistry Department, College of Pharmacy, Taibah University, Al-Madinah Al-Munawarah 41477, Saudi Arabia

<sup>5</sup>Department of Chemistry, Faculty of Science, Taibah University, Yanbu, Saudi Arabia

<sup>6</sup>Department of Chemistry, Faculty of Science, University of Tabuk, Tabuk, 47512, Saudi Arabia

<sup>7</sup>Pharmaceutical Chemistry Department, College of Pharmacy, The Islamic University, Najaf, Iraq

<sup>8</sup>Department of Pharmacology and Toxicology, College of Pharmacy, Taibah University, Medina 42353, Saudi Arabia

<sup>9</sup>Department of Basic Science (Chemistry), College of Science and Humanities, Shaqra University, Afif, Saudi Arabia

<sup>10</sup> Division of Biochemistry, Department of Pharmacology, College of Pharmacy, Taif University, P.O. Box 11099, Taif 21944, Kingdom of Saudi Arabia.

<sup>11</sup>Department of biology, Jumum College University, Umm Al-Qura University, P.O Box7388, Makkah 21955, Sudia Arabia

<sup>12</sup>Agriculture Genetic Engineering Research Institute (AGERI), Agriculture Research Centre, Giza, Egypt

<sup>13</sup>Egyptian Drug Authority (EDA) 51 Wezaret El-Zeraa St, Dokki, Giza, A. R. Egypt

Corresponding Author:

Khaled El-Adl, [eladlkhaled74@yahoo.com](mailto:eladlkhaled74@yahoo.com); [eladlkhaled74@azhar.edu.eg](mailto:eladlkhaled74@azhar.edu.eg); [khaled.eladl@hu.edu.eg](mailto:khaled.eladl@hu.edu.eg)

Pulse Sequence: s2pu1

Solvent: DMSO  
Temp. 30.0 C / 303.1 K  
Mercury-30088 "NMR300"

Relax. delay 1.000 sec  
Pulse 74.1 degrees  
Acq. time 4.004 sec  
Width 8000.0 Hz  
10 repetitions  
OBSERVE H1, 300.0687875 MHz  
DATA PROCESSING  
FT size 65536  
Total time 19 min, 19 sec

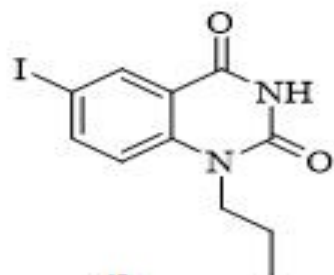

4b

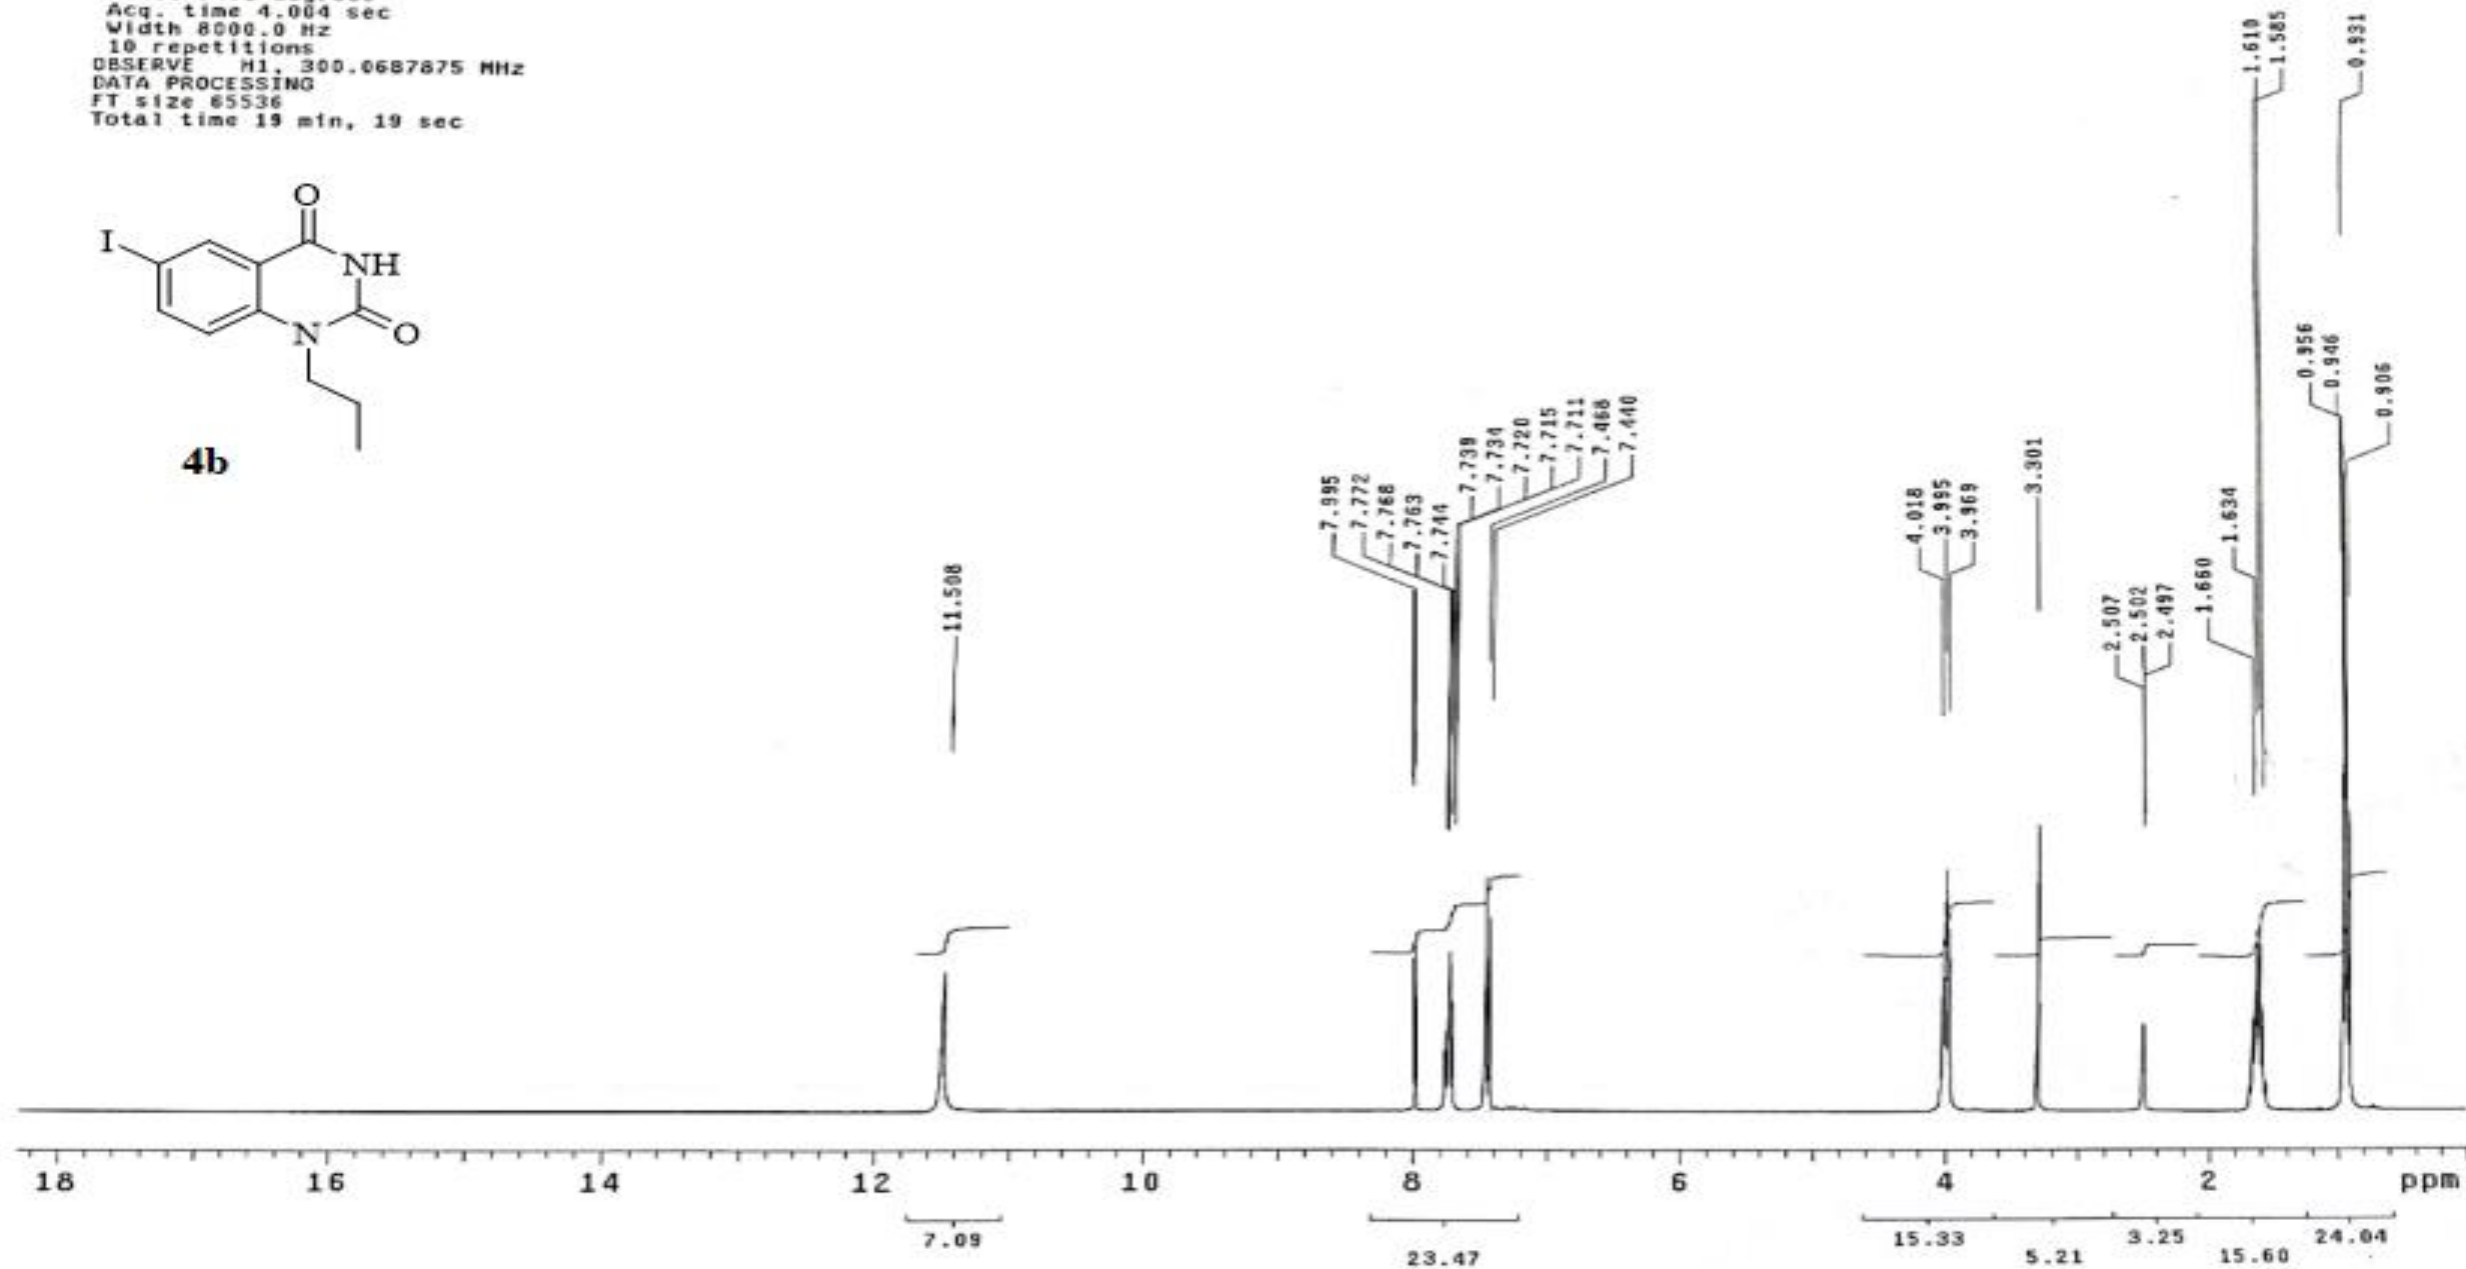

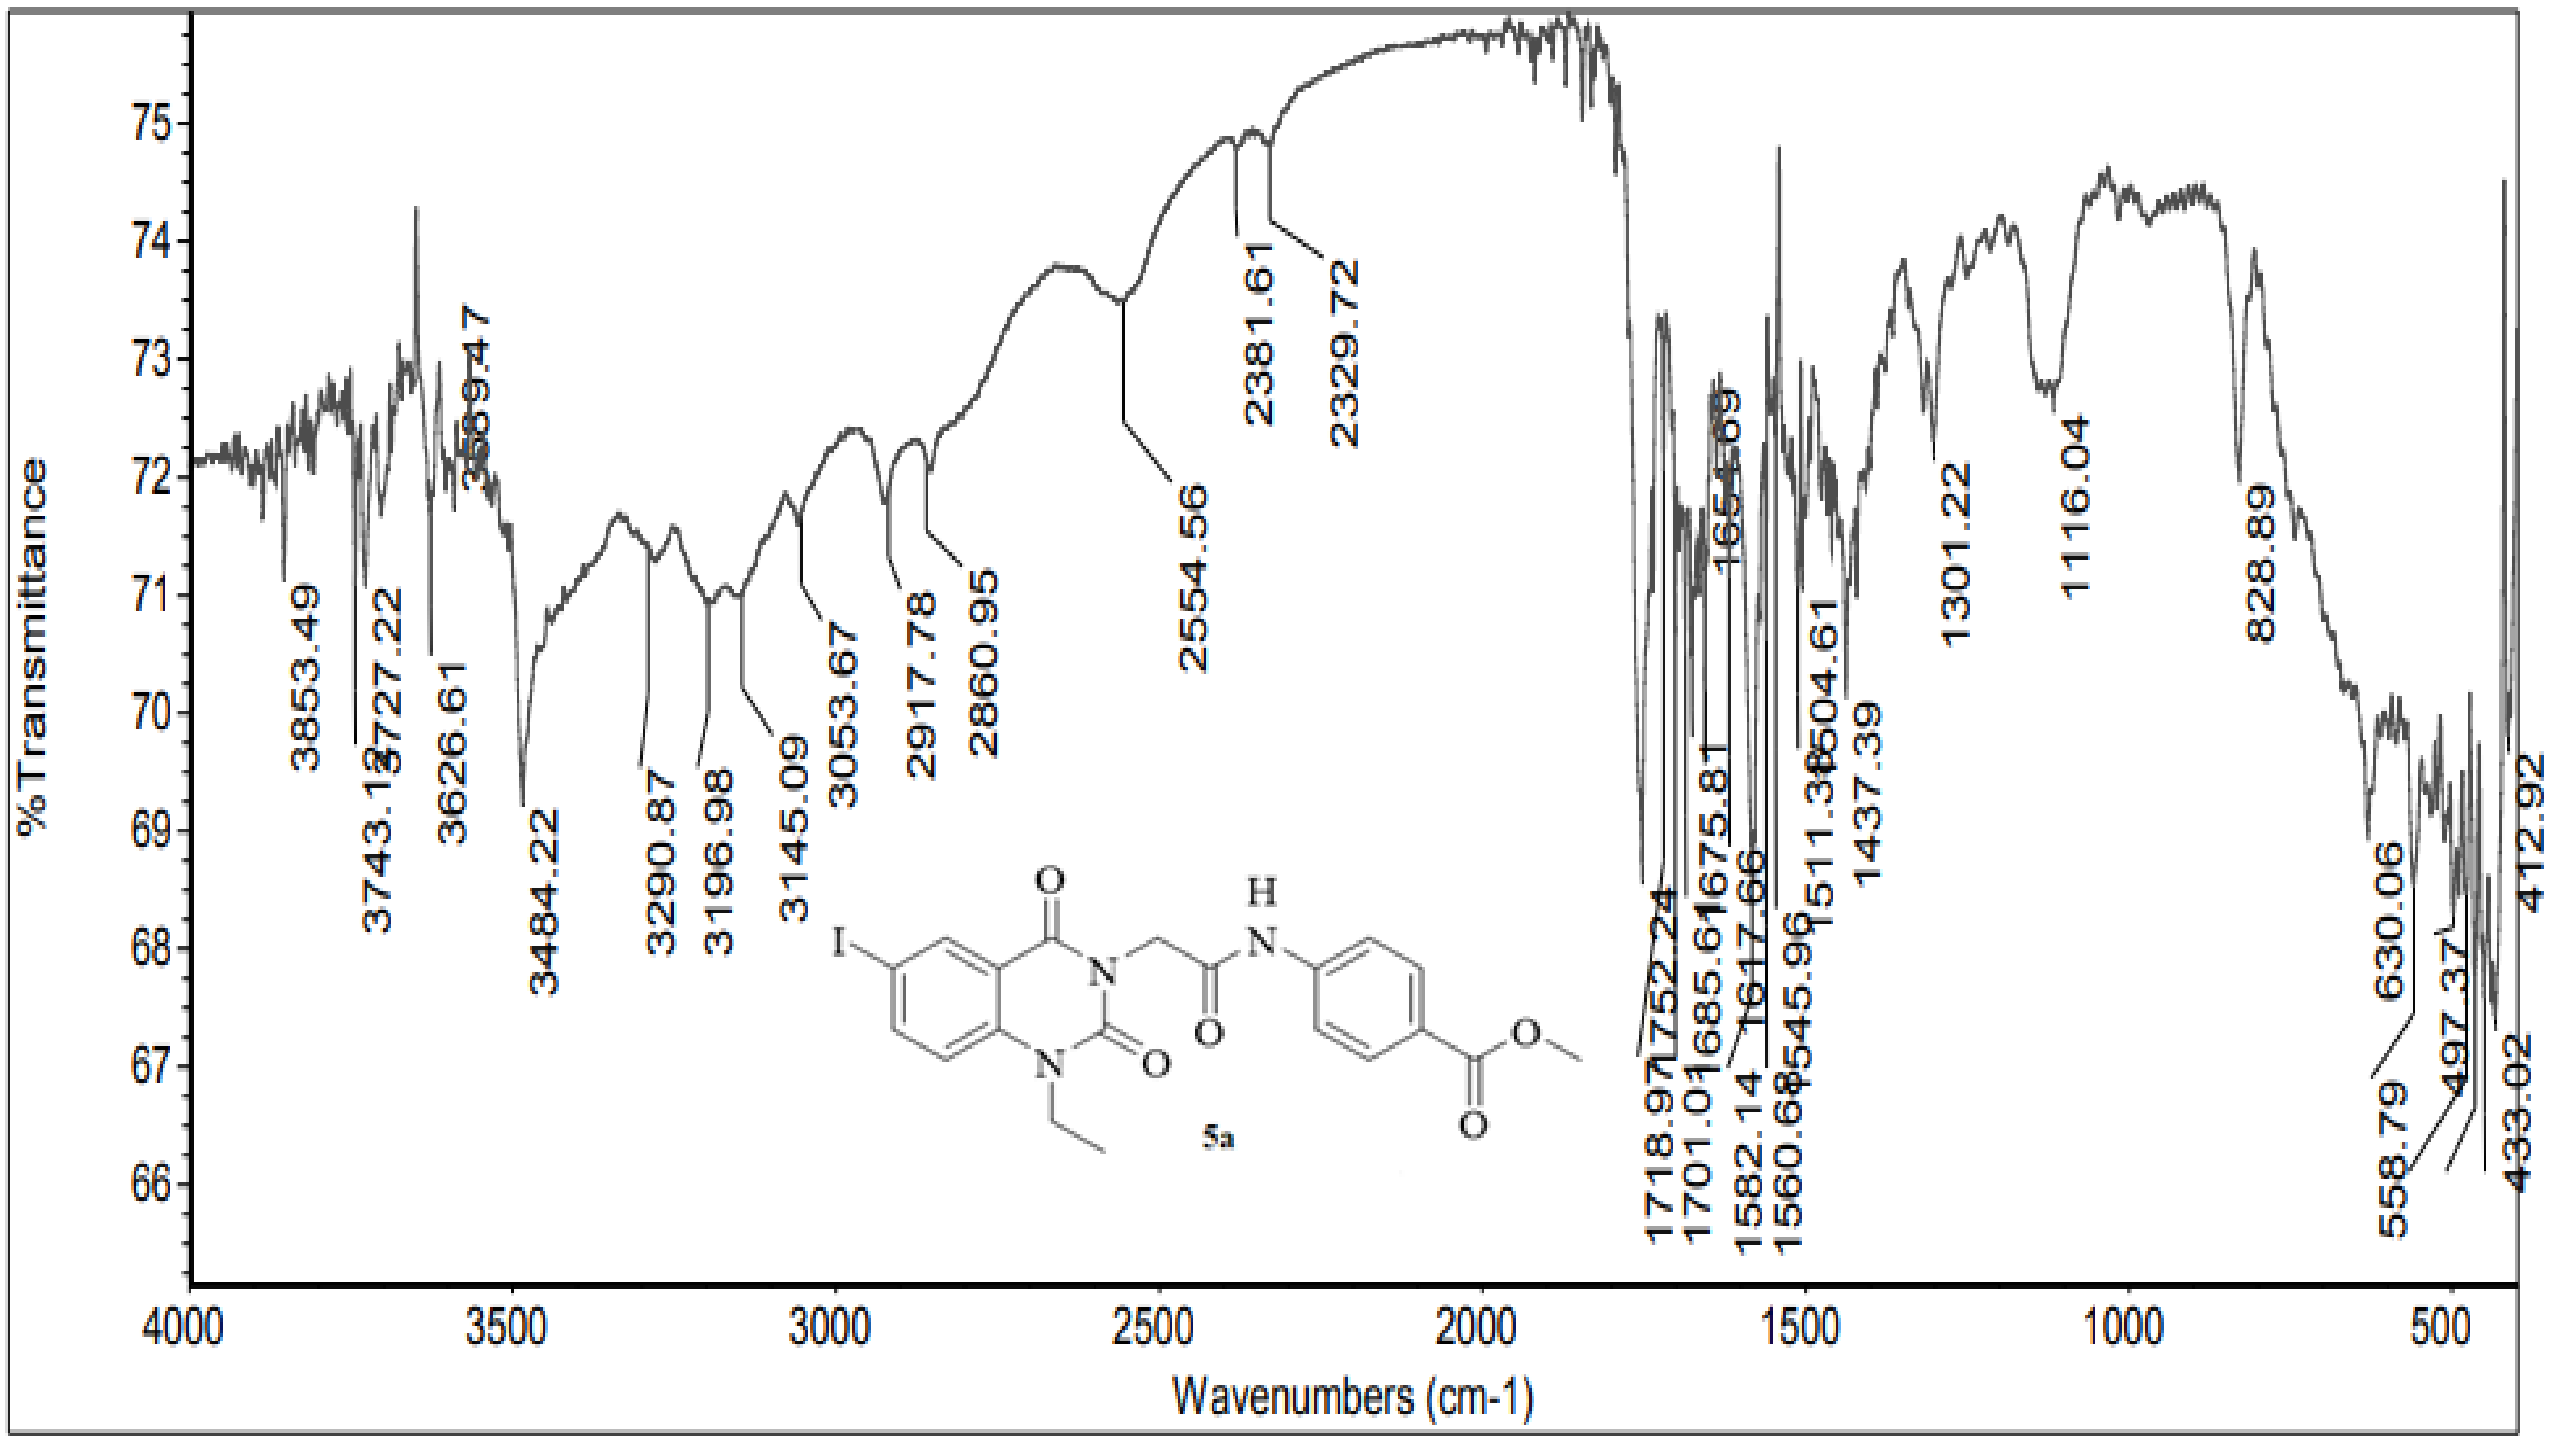

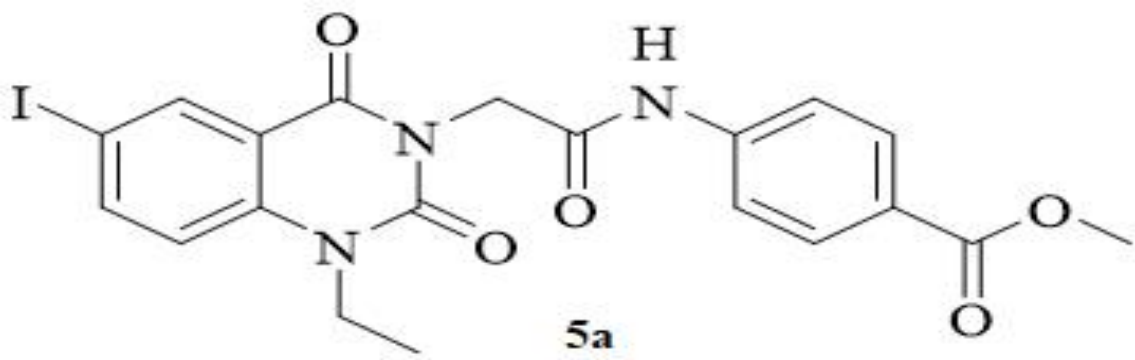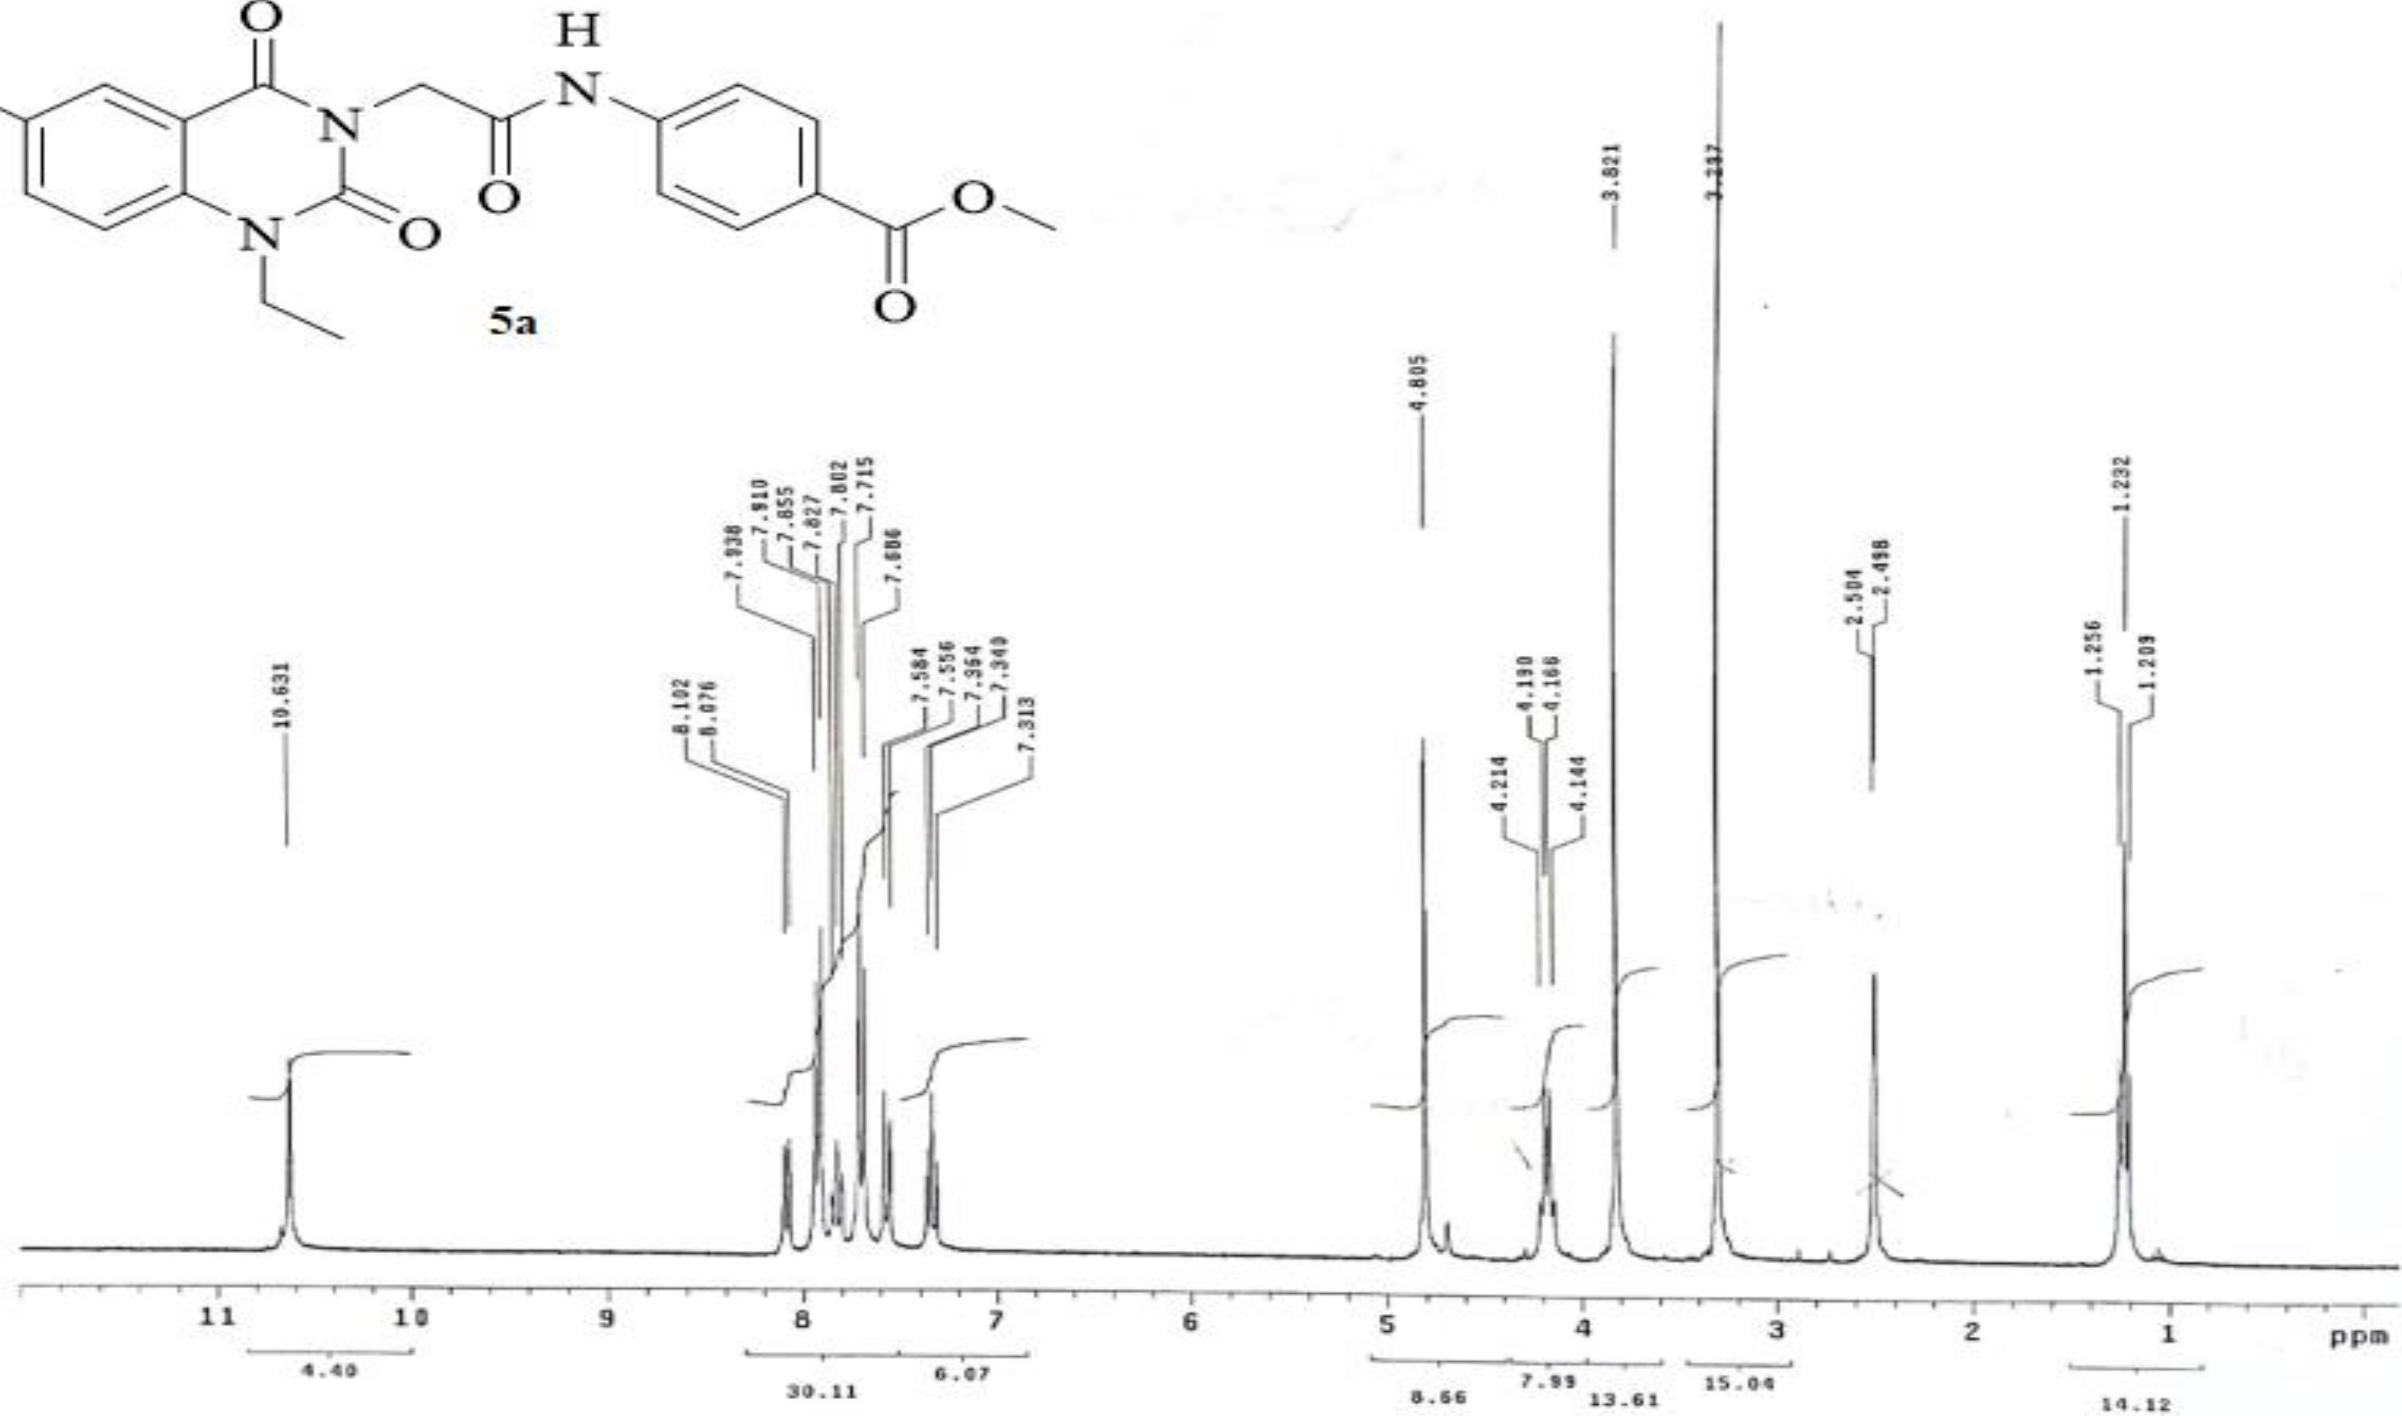

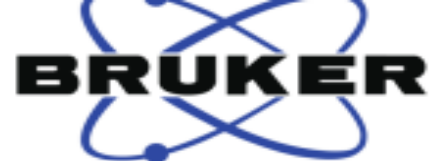

Current Data Parameters  
NAME K-9  
EXPNO 2  
PROCNO 1

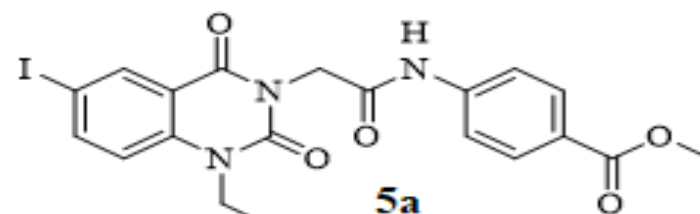

DS 4  
SWH 24038.461 Hz  
FIDRES 0.366798 Hz  
AQ 1.3631488 sec  
RG 205.37  
DW 20.800 usec  
DE 6.50 usec  
TE 300.0 K  
D1 2.00000000 sec  
D11 0.03000000 sec  
TD0 1

----- CHANNEL f1 -----  
SFO1 100.6278588 MHz  
NUC1 13C  
P1 10.00 usec  
PLW1 47.00000000 W

----- CHANNEL f2 -----  
SFO2 400.1516006 MHz  
NUC2 1H  
PCPD2 waltz16  
PCPD2 90.00 usec  
PLW2 18.00000000 W  
PLW12 0.34722000 W  
PLW13 0.28125000 W

F2 - Processing parameters  
SI 32768  
SF 100.6177975 MHz  
WDW EM  
SSB 0  
LB 1.00 Hz  
GB 0  
PC 1.40

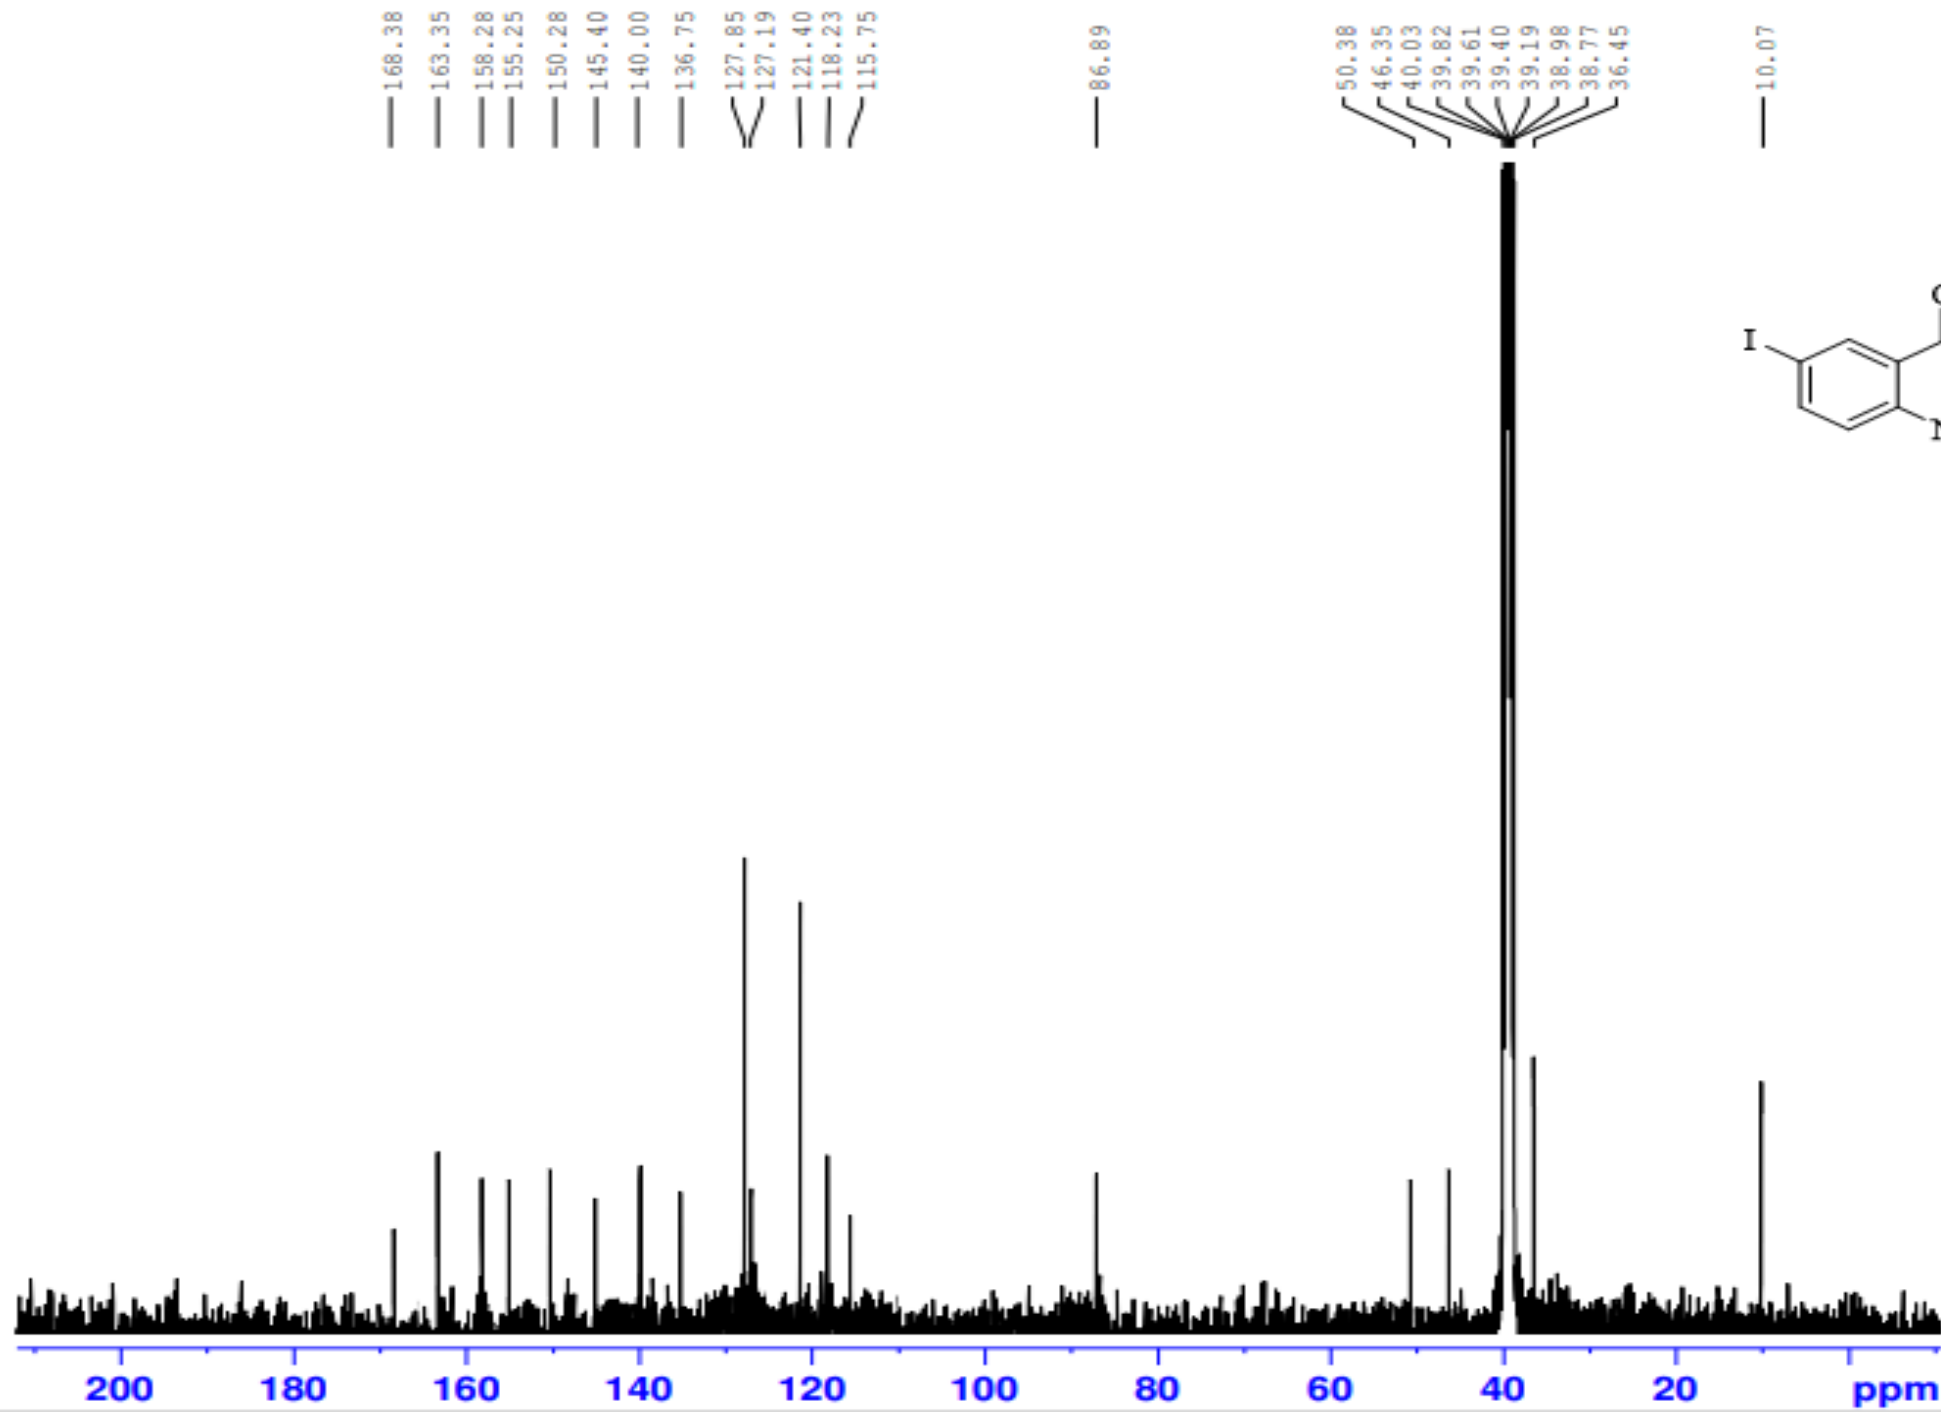

Relative Abundance

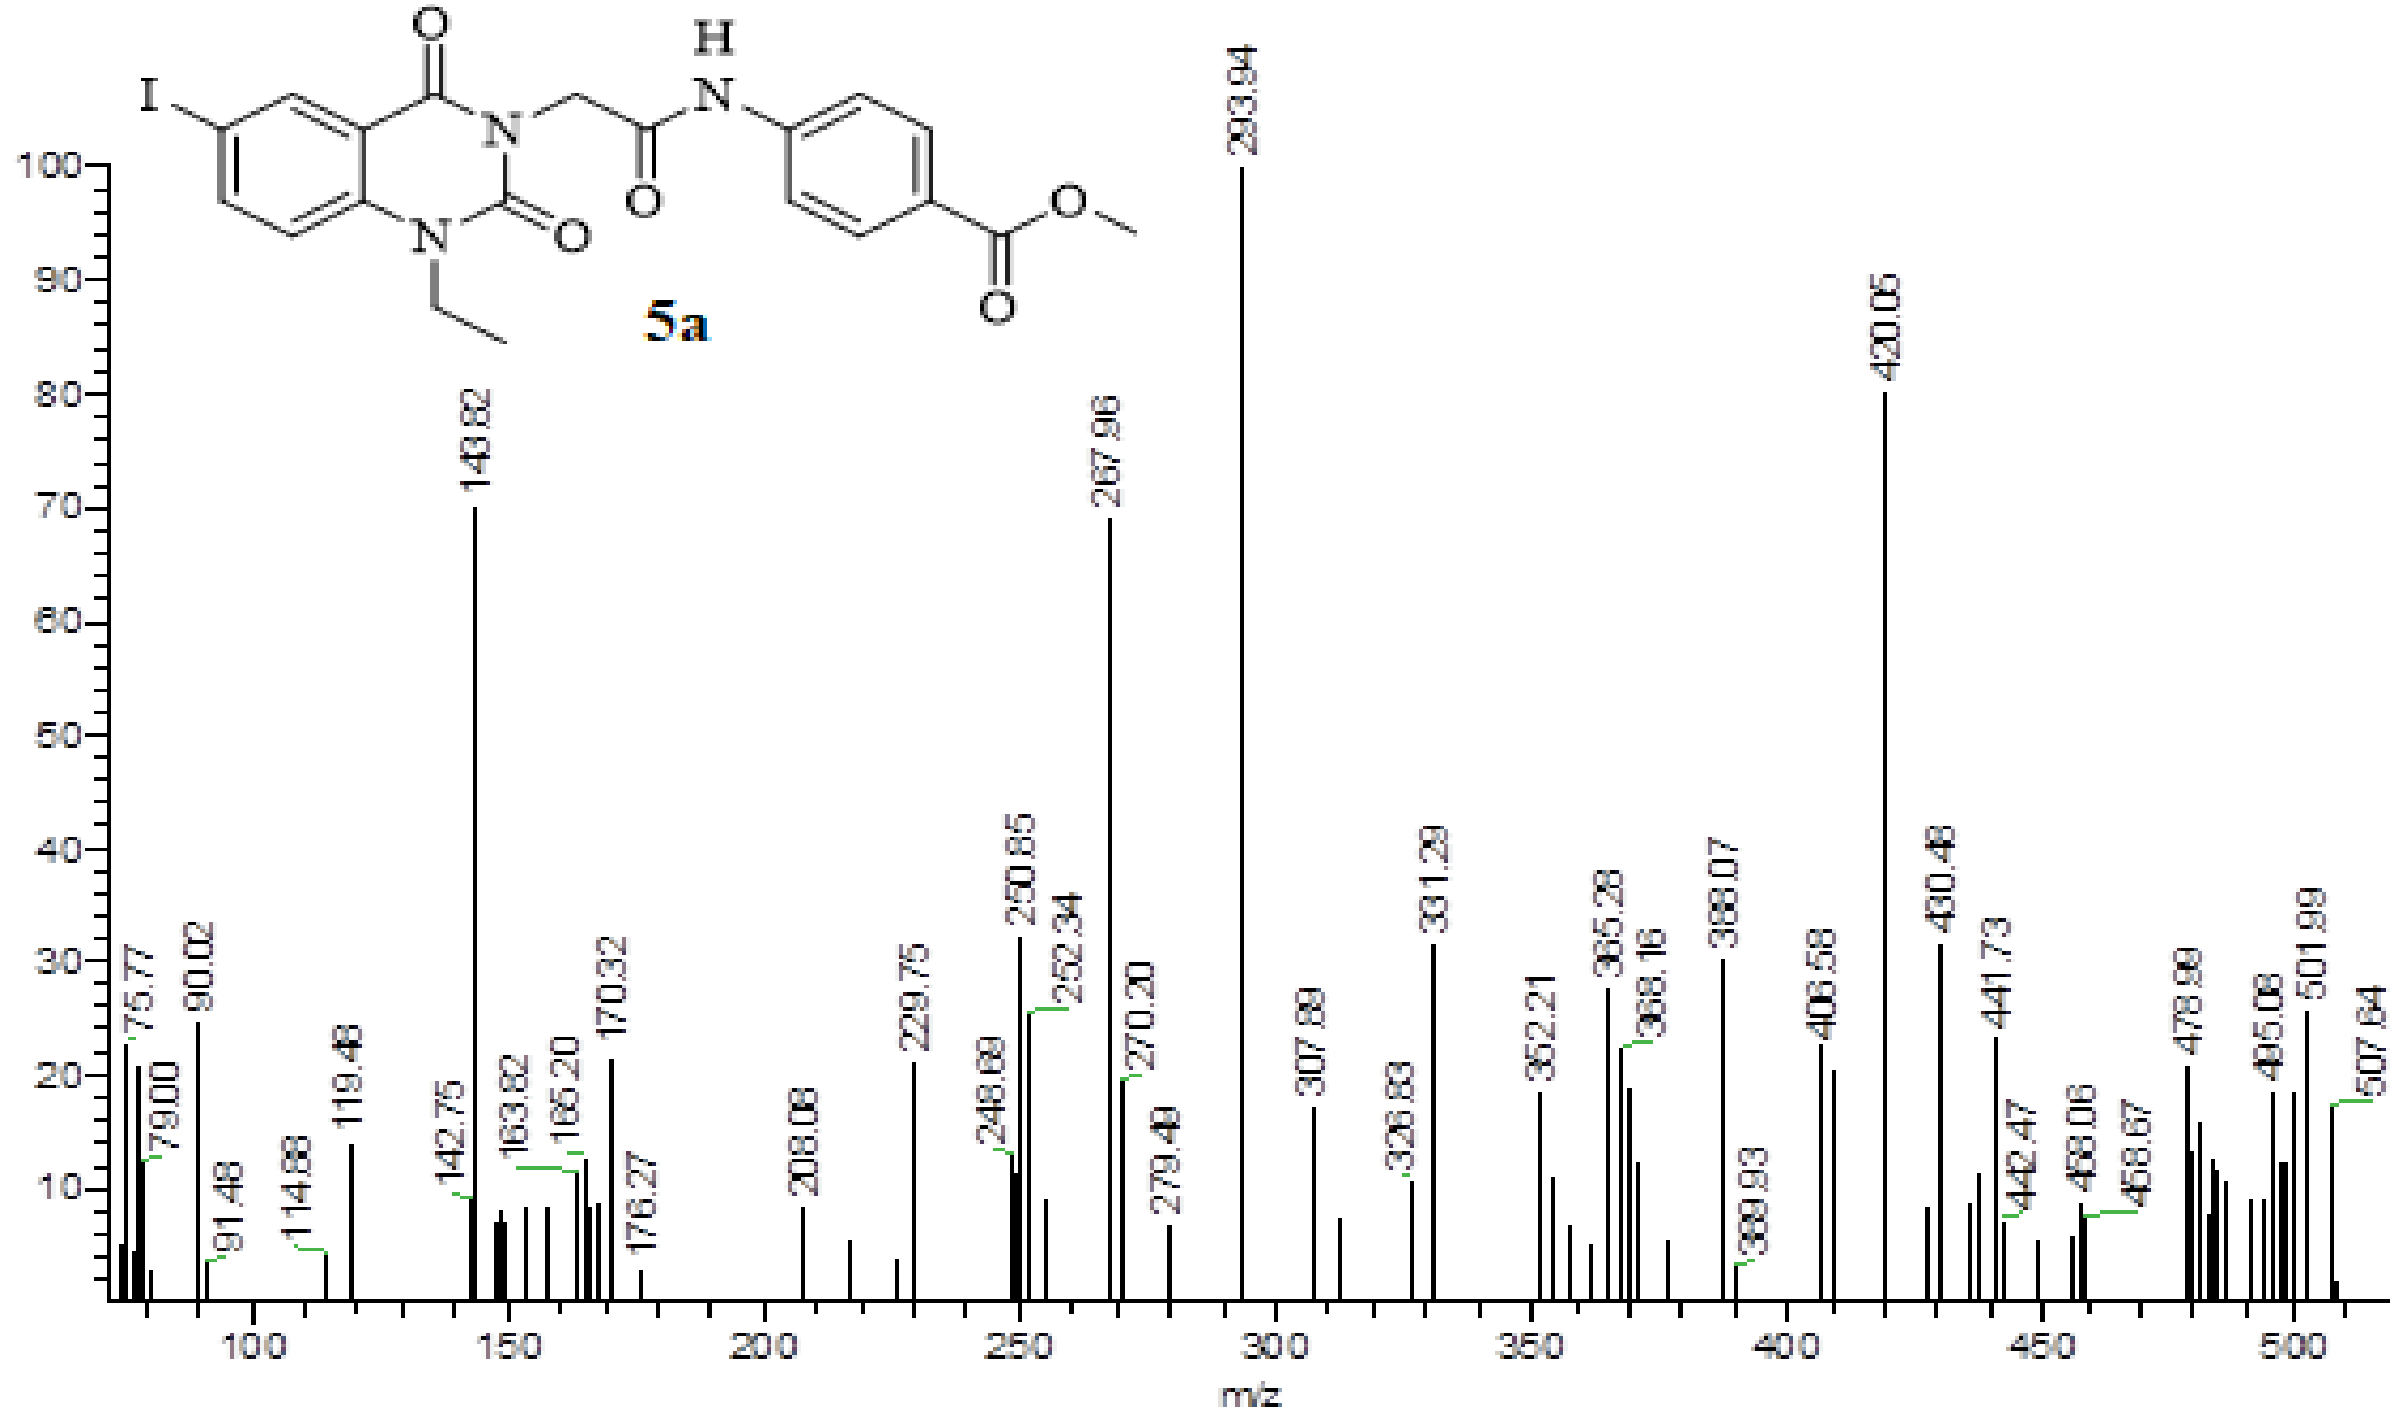

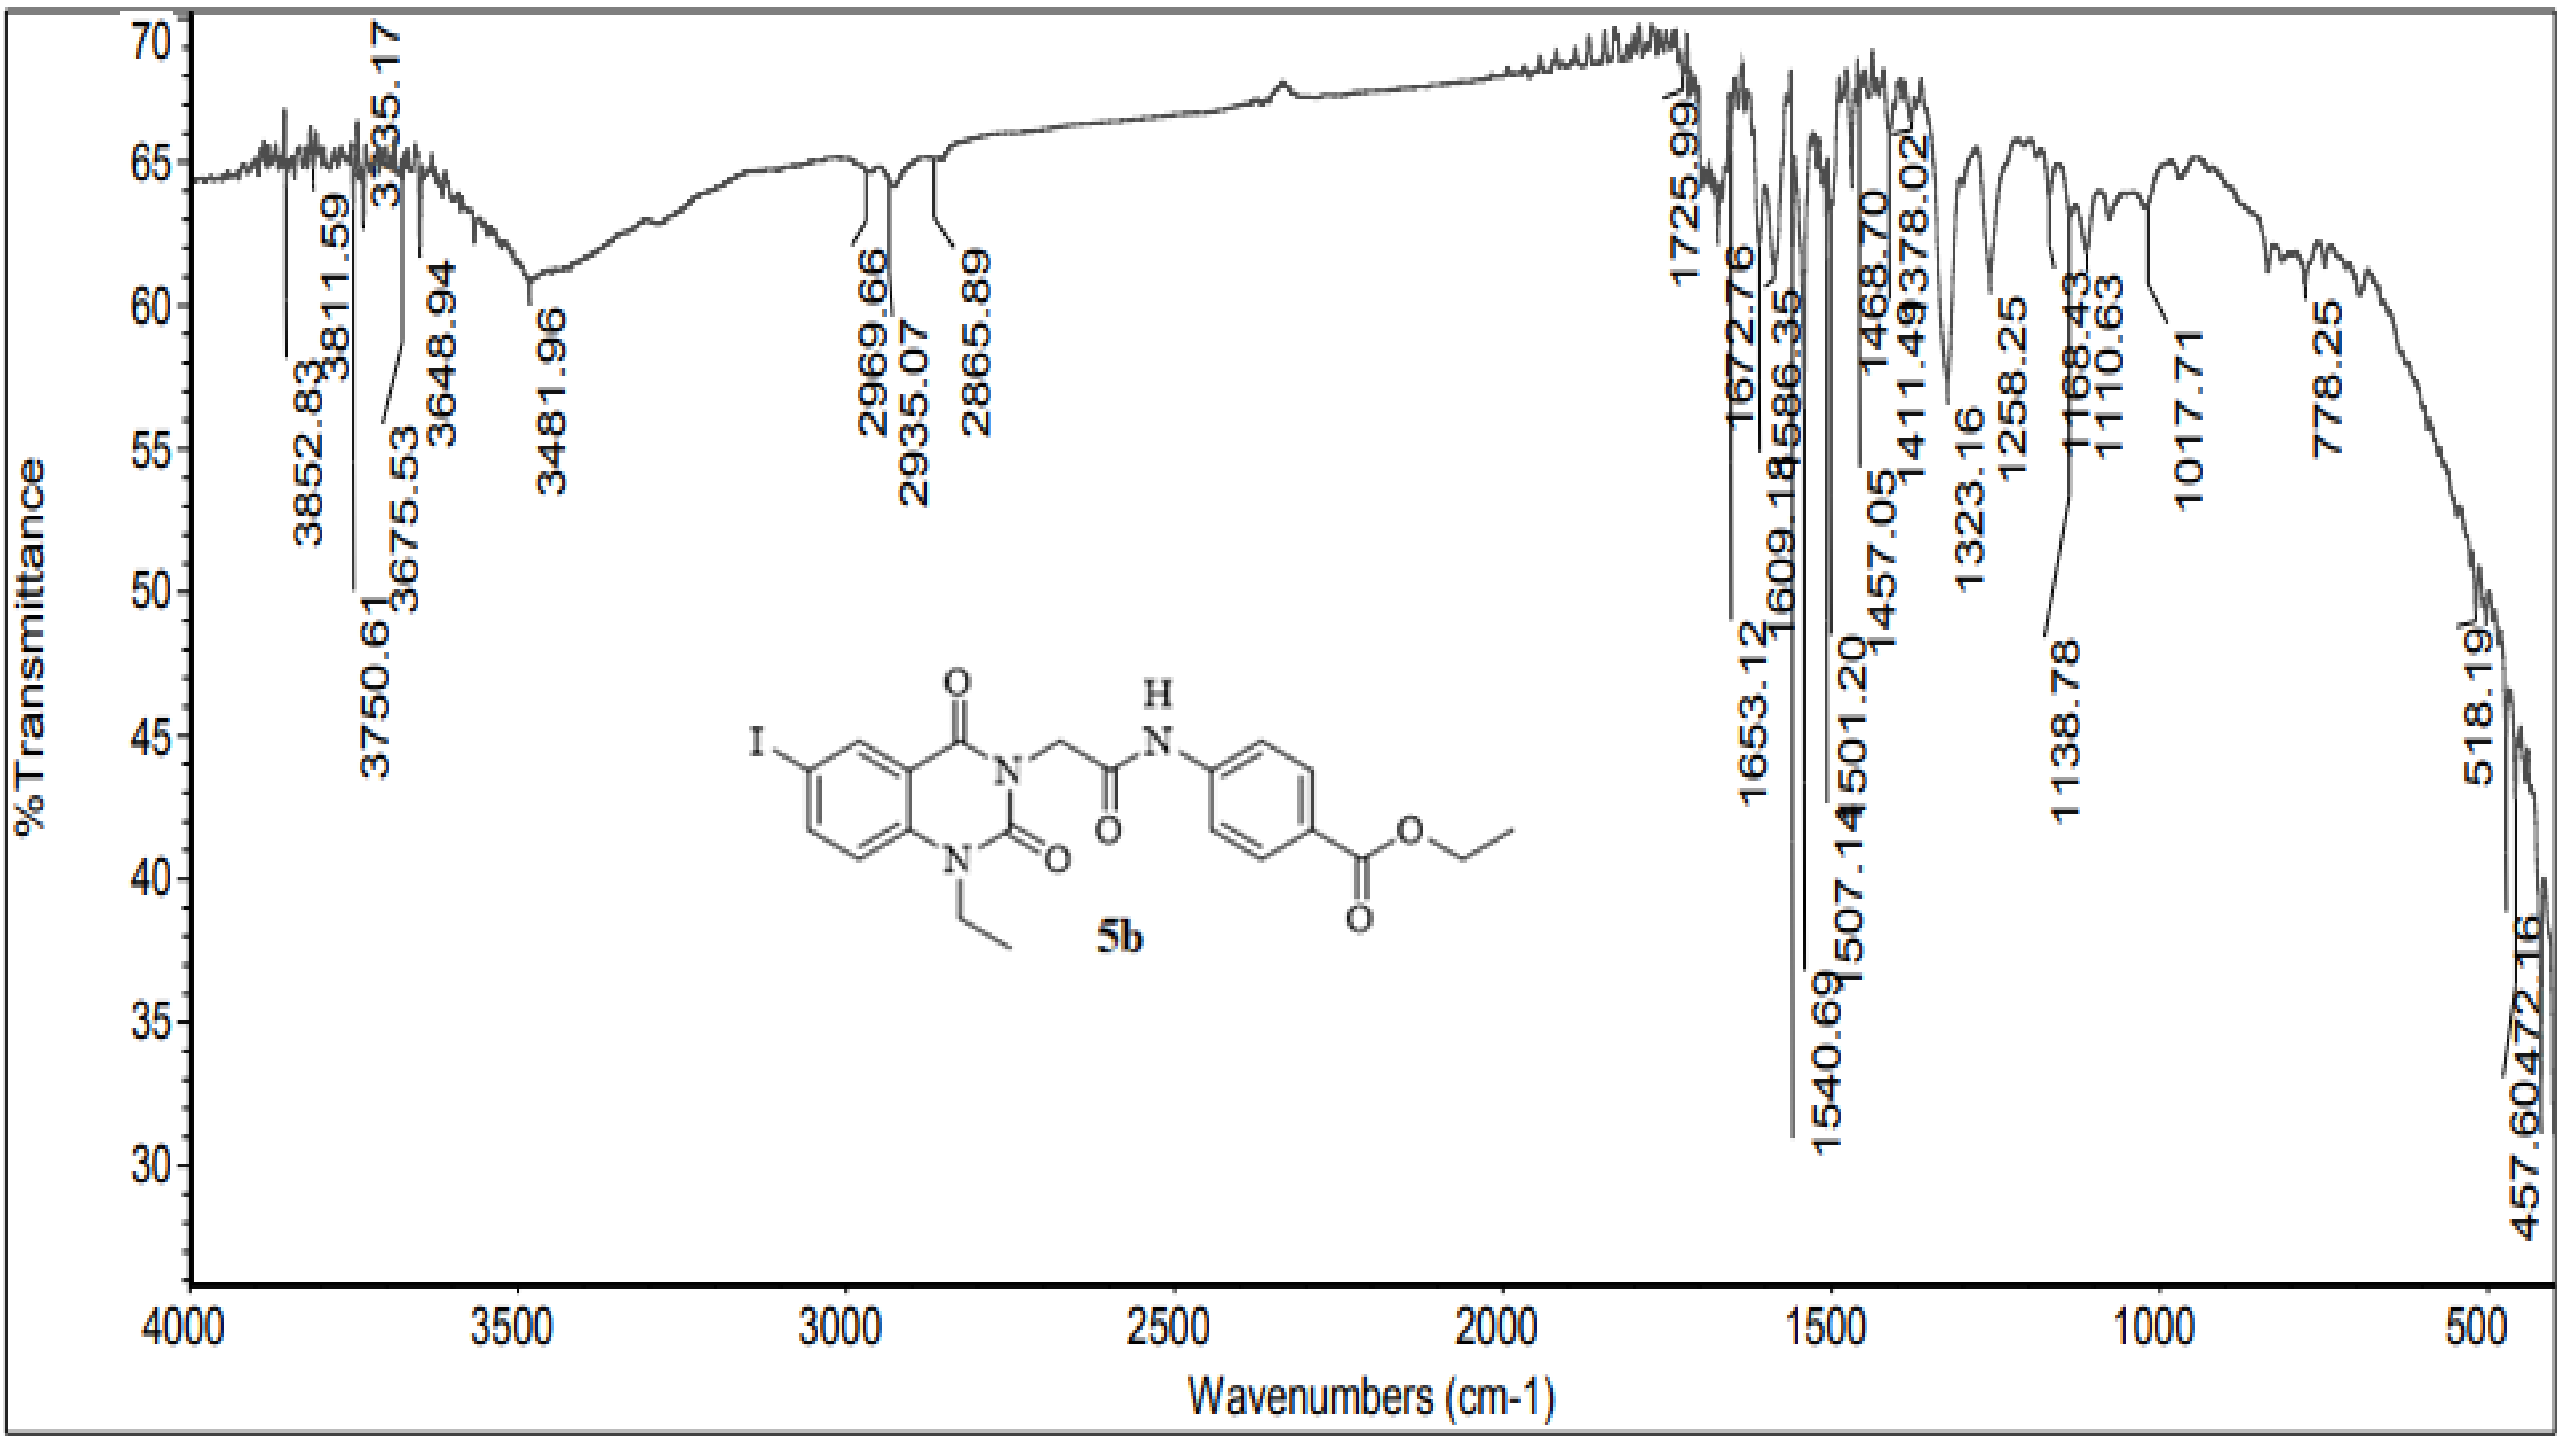

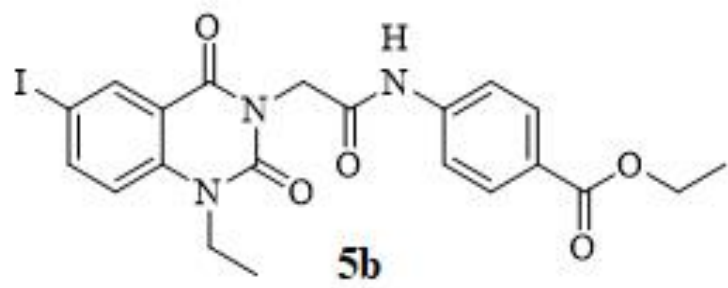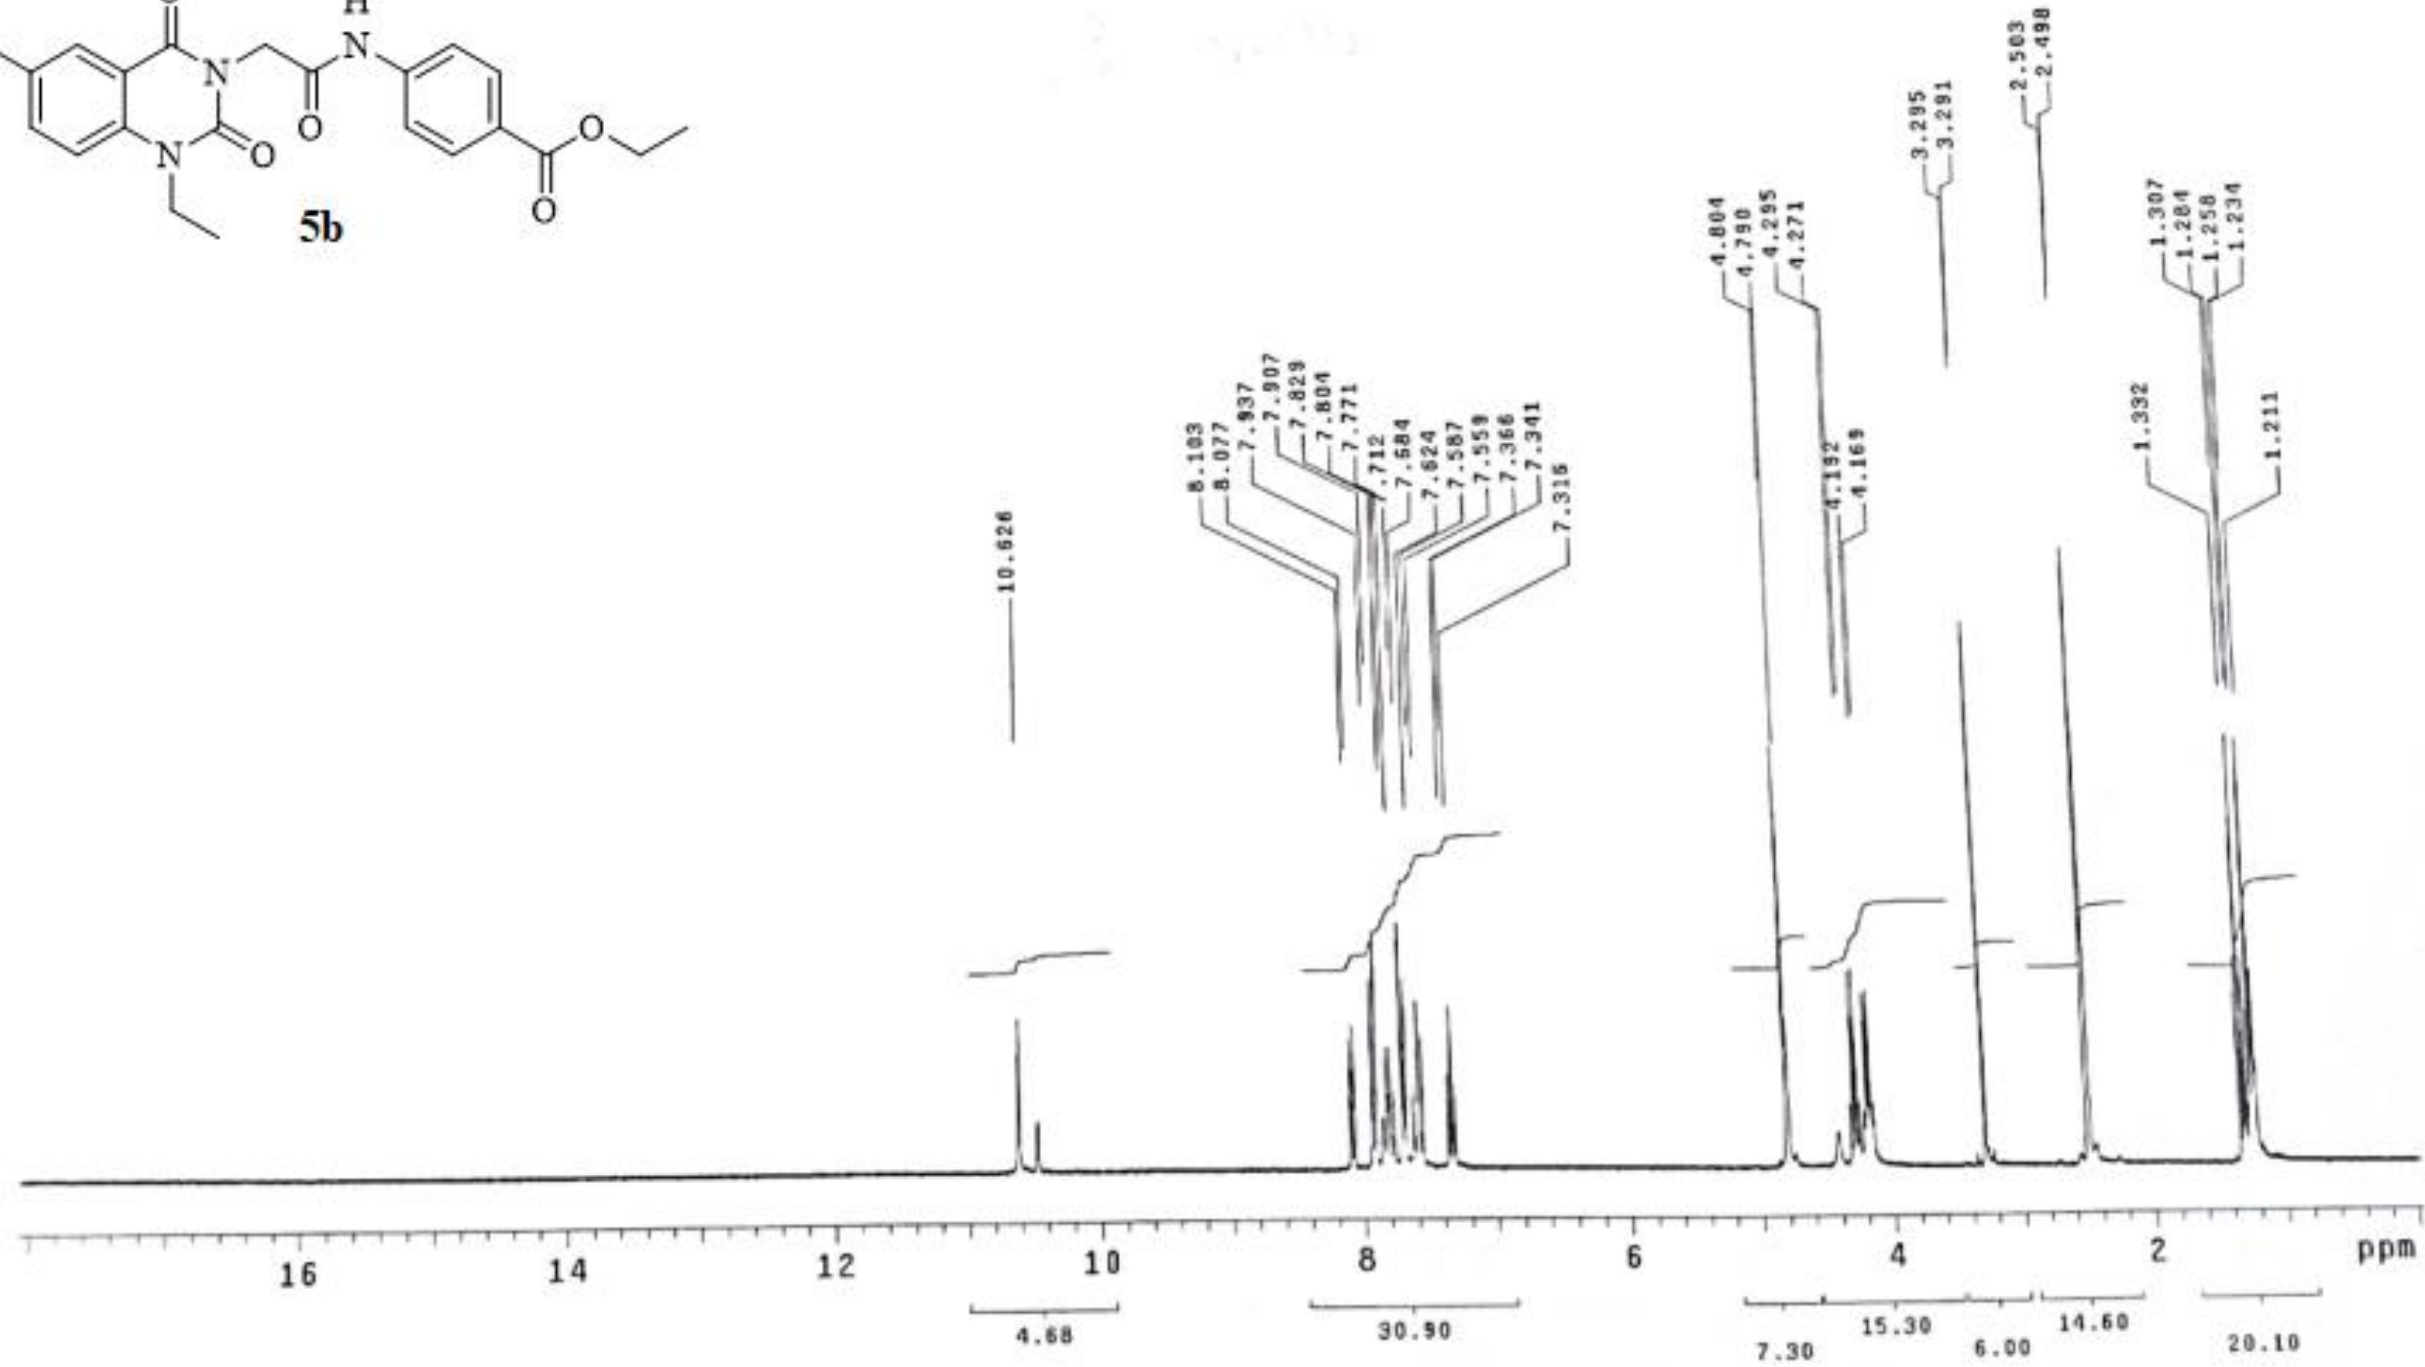



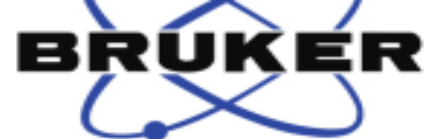

Current Data Parameters  
NAME K-H  
EXPNO 3  
PROCNO 1

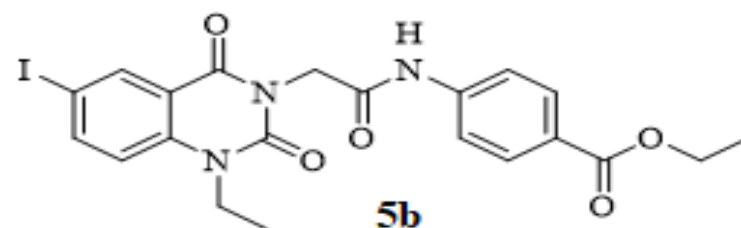

DS 4  
SWH 24038.461 Hz  
FIDRES 0.366798 Hz  
AQ 1.3631488 sec  
RG 205.37  
DW 20.800 usec  
DE 6.50 usec  
TE 300.0 K  
D1 2.00000000 sec  
D11 0.03000000 sec  
TD0 1

----- CHANNEL f1 -----  
SFO1 100.6278588 MHz  
NUC1 13C  
P1 10.00 usec  
PLW1 47.00000000 W

----- CHANNEL f2 -----  
SFO2 400.1516006 MHz  
NUC2 1H  
CPDPRG[2] waltz16  
PCPD2 90.00 usec  
PLW2 18.00000000 W  
PLW12 0.34722000 W  
PLW13 0.28125000 W

F2 - Processing parameters  
SI 32768  
SF 100.6177975 MHz  
WDW EM  
SSB 0  
LB 1.00 Hz  
GB 0  
PC 1.40

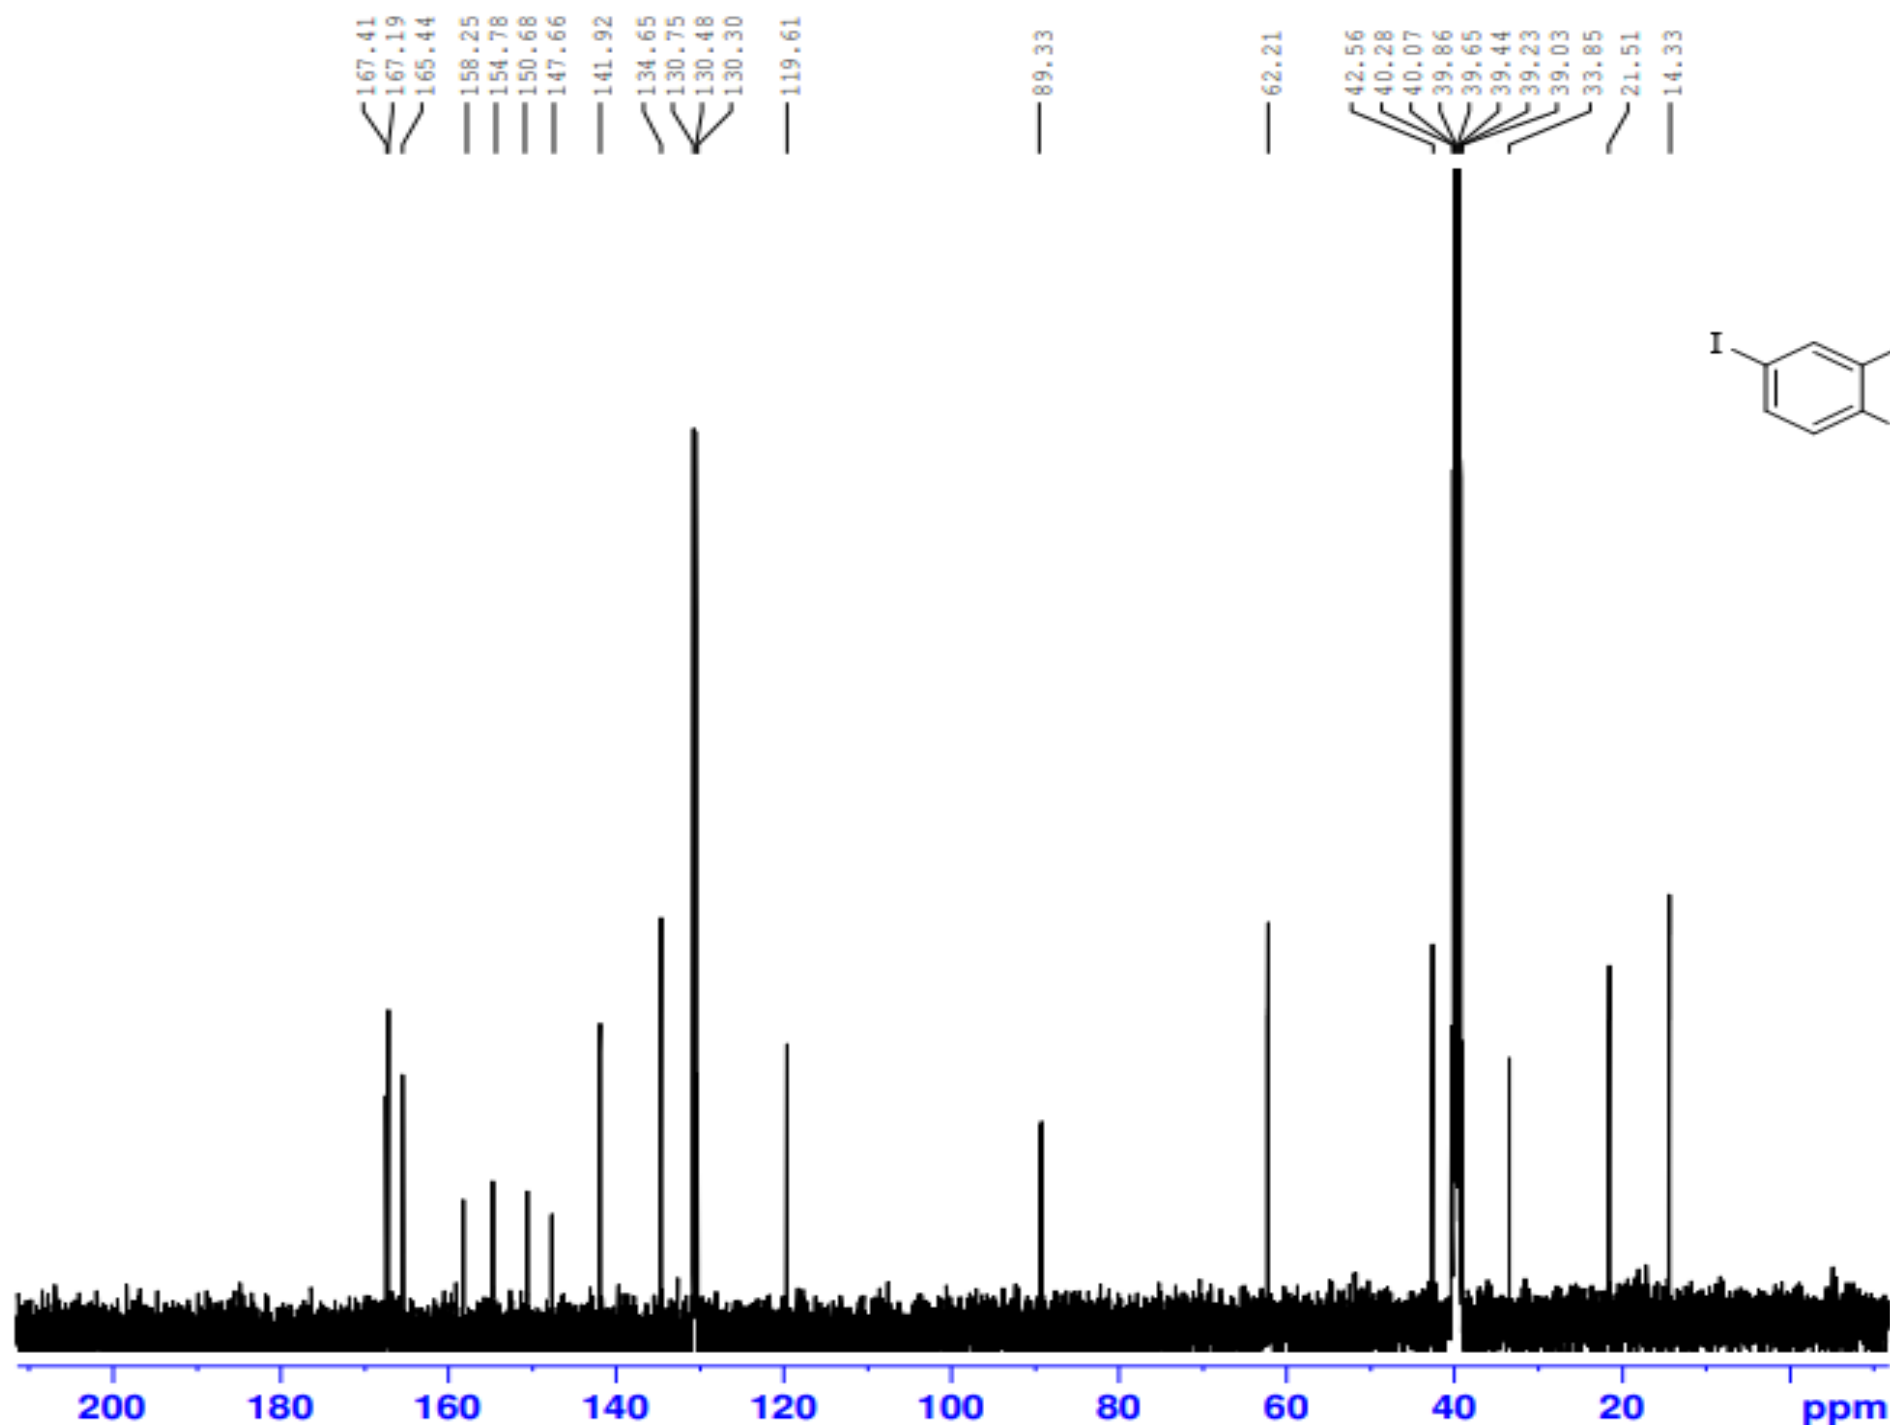

% Transmittance

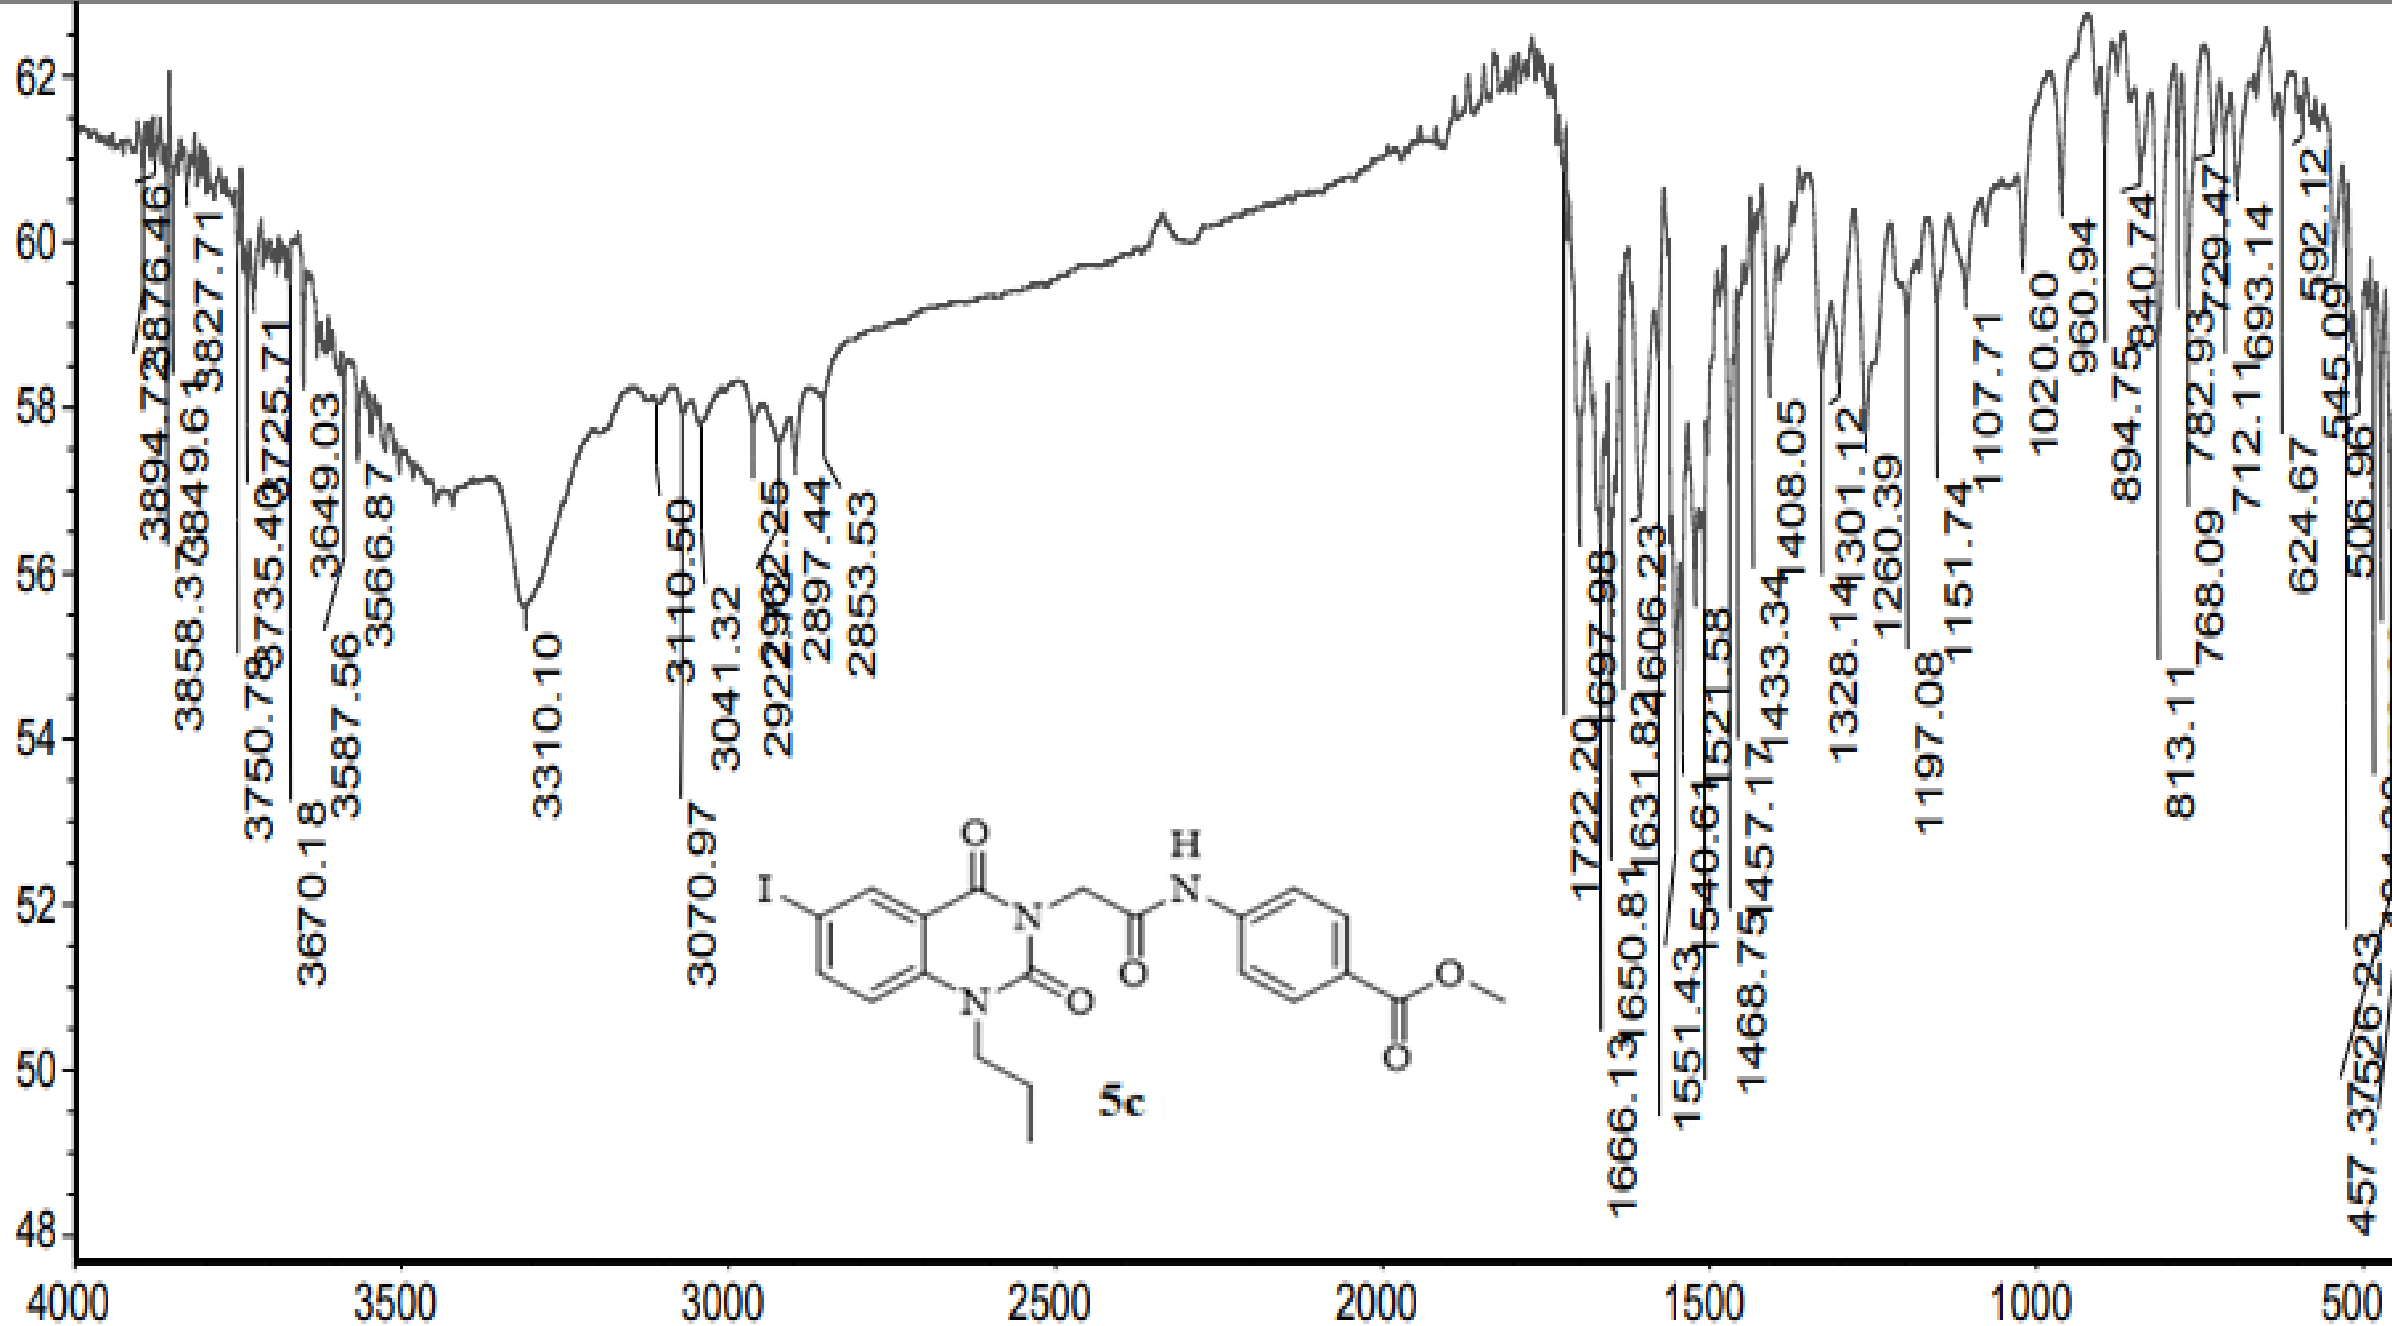

Wavenumbers (cm-1)

Acq. time 4.004 sec  
Width 8000.0 Hz  
14 repetitions  
OBSERVE H1, 300.0687875 MHz  
DATA PROCESSING  
FT size 65536  
Total time 19 min, 19 sec

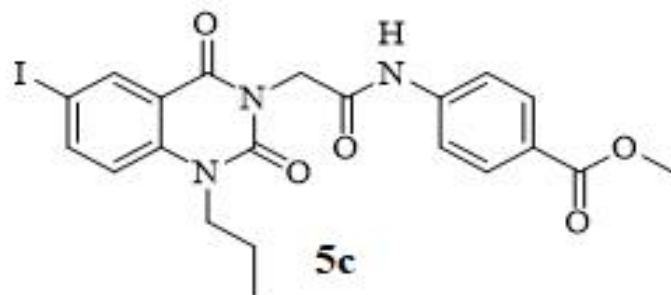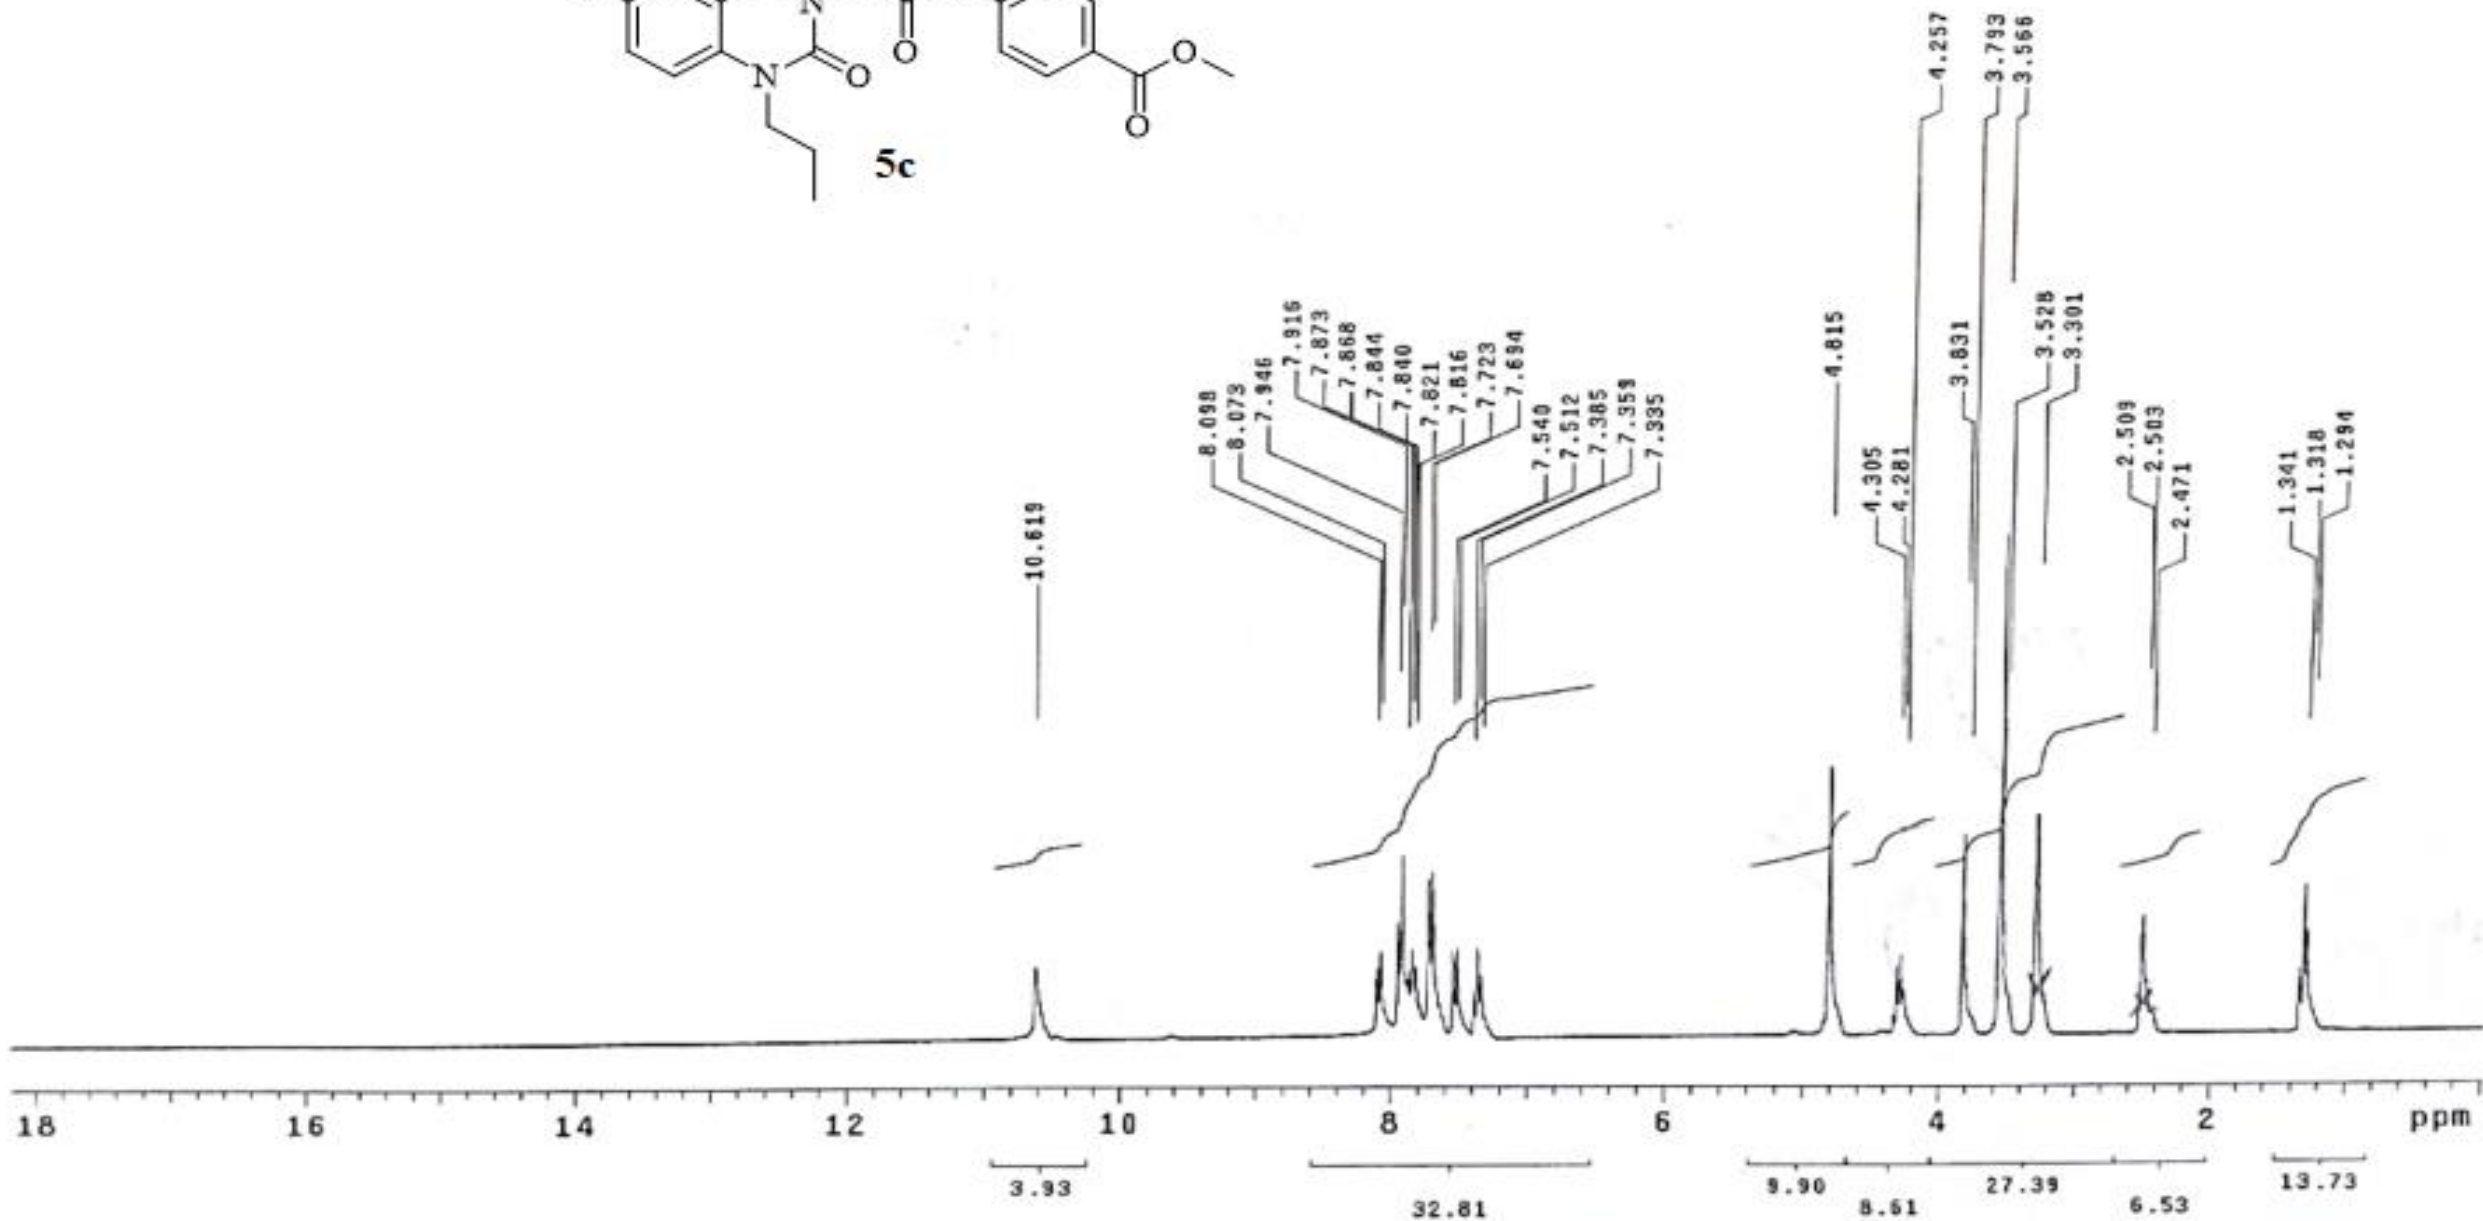

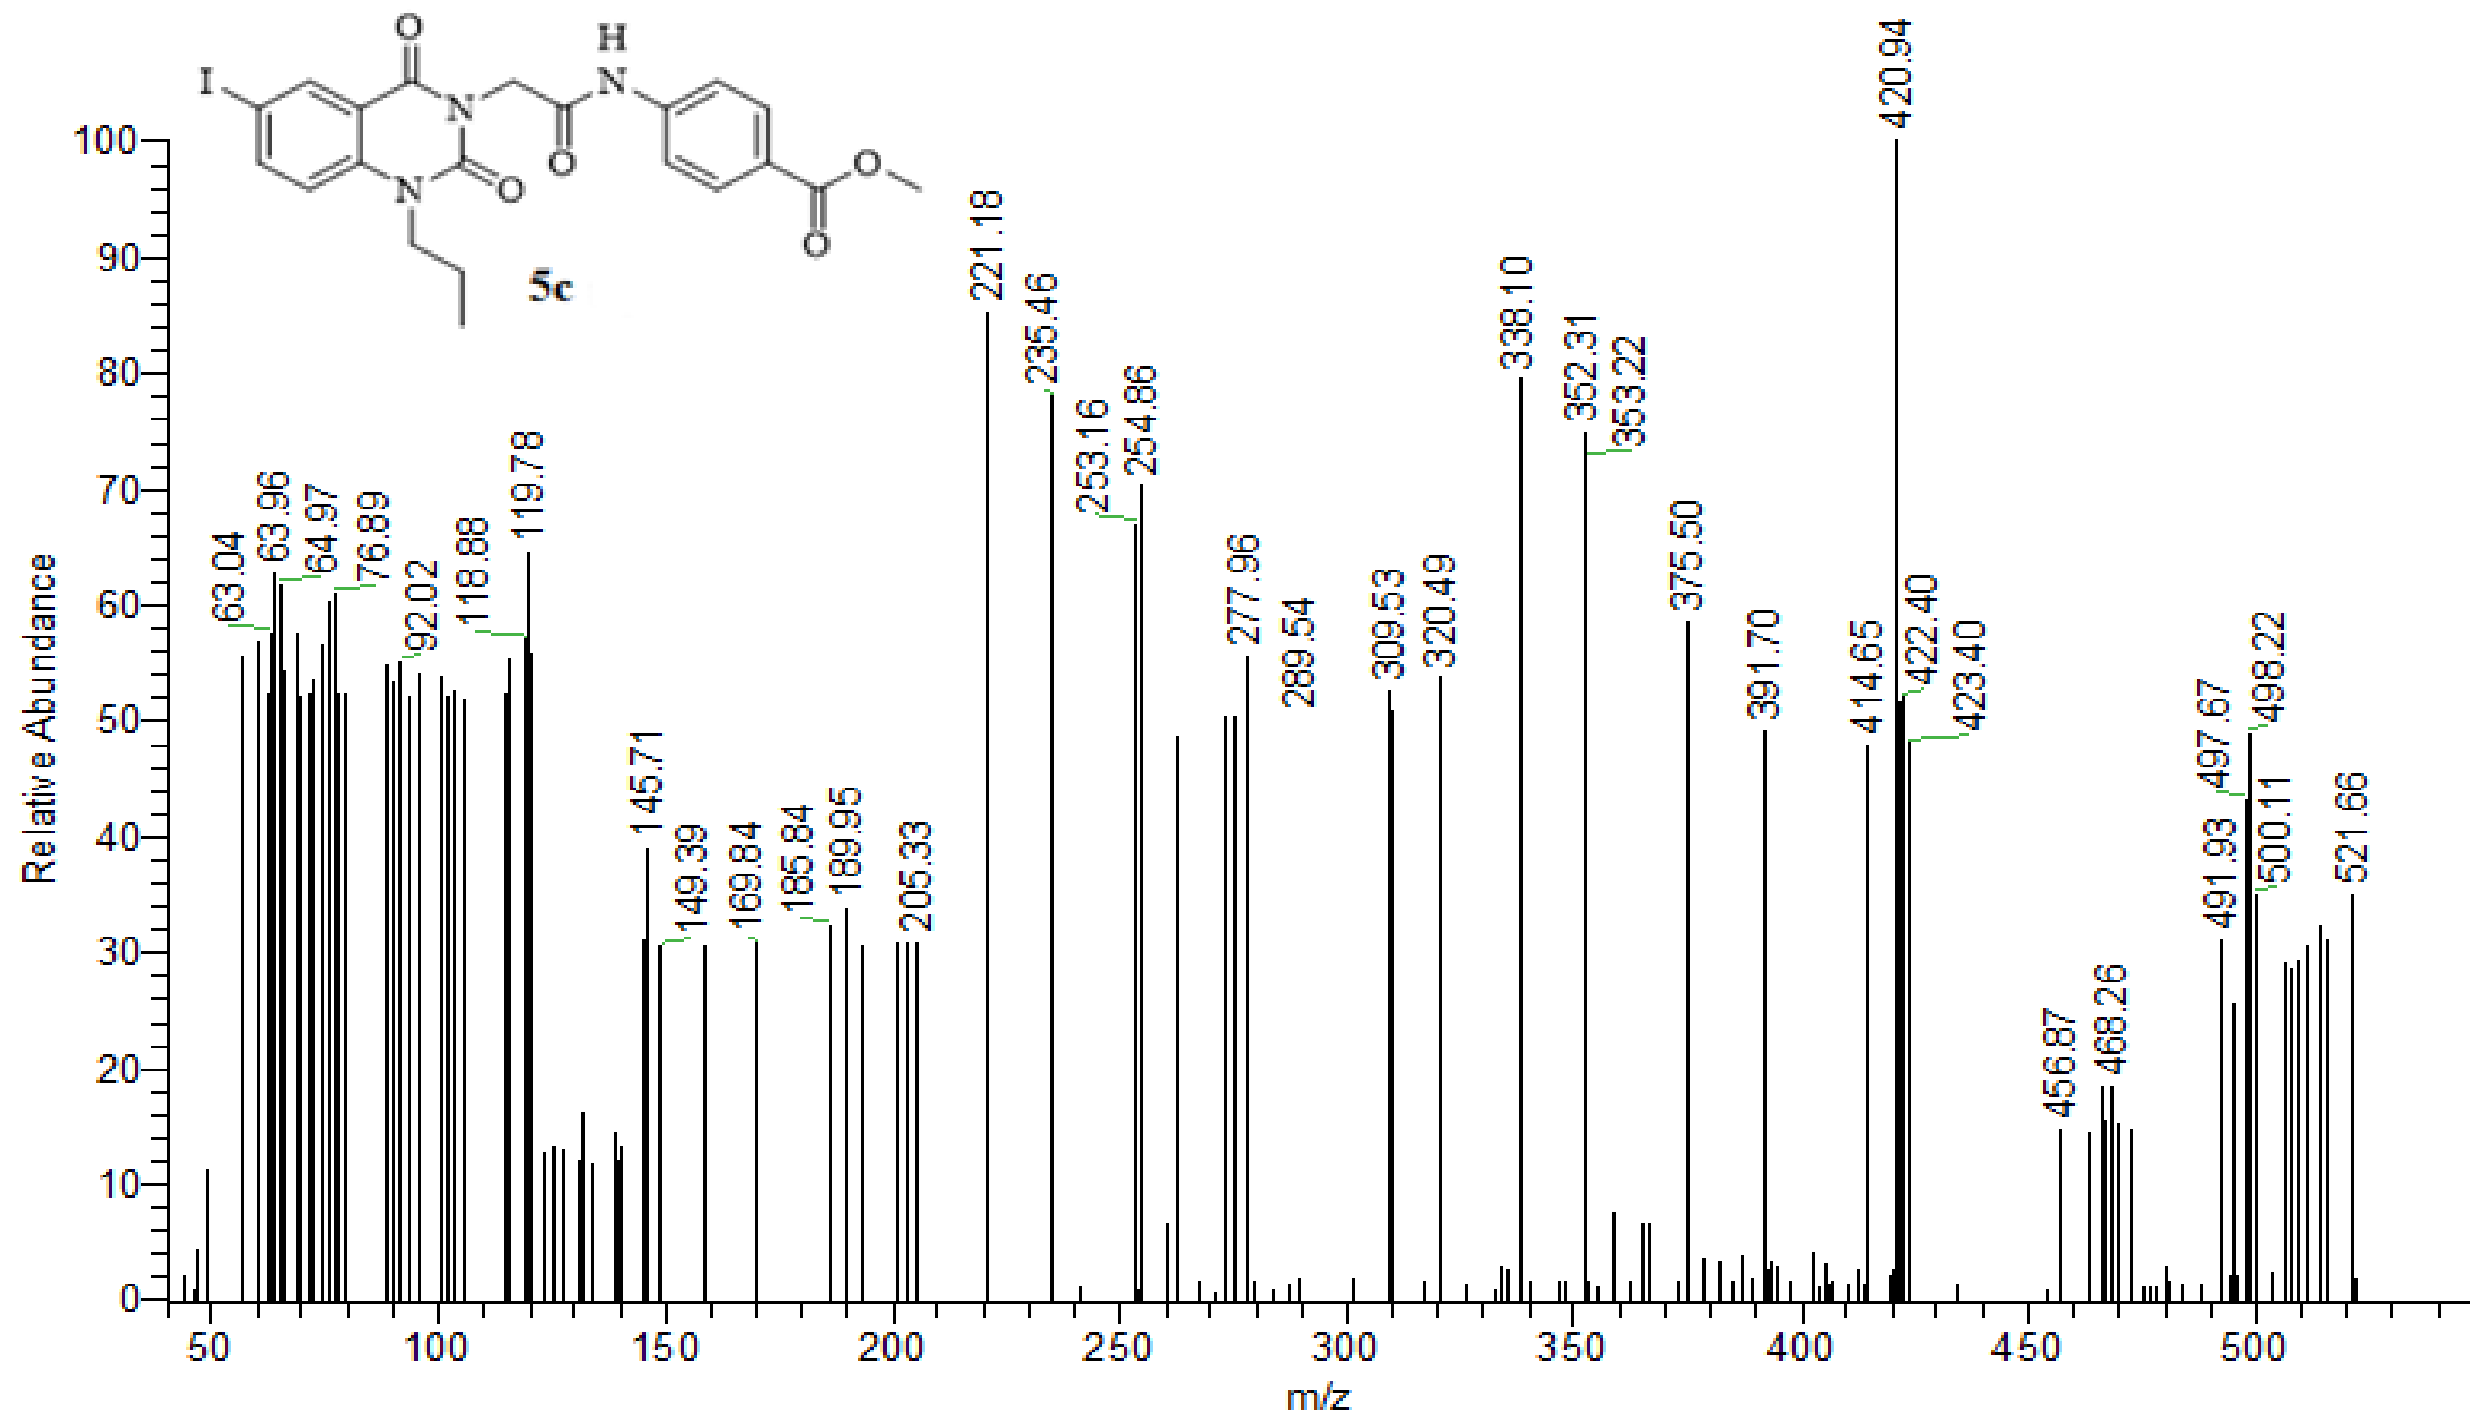

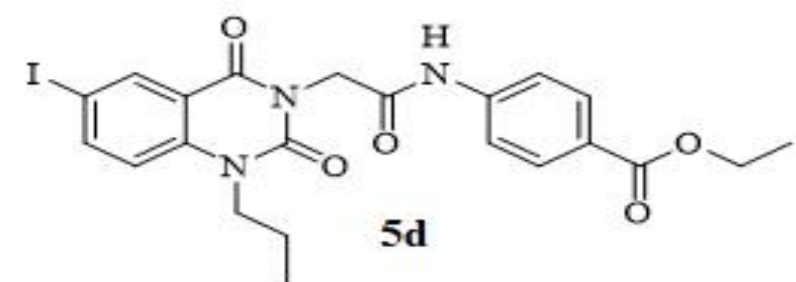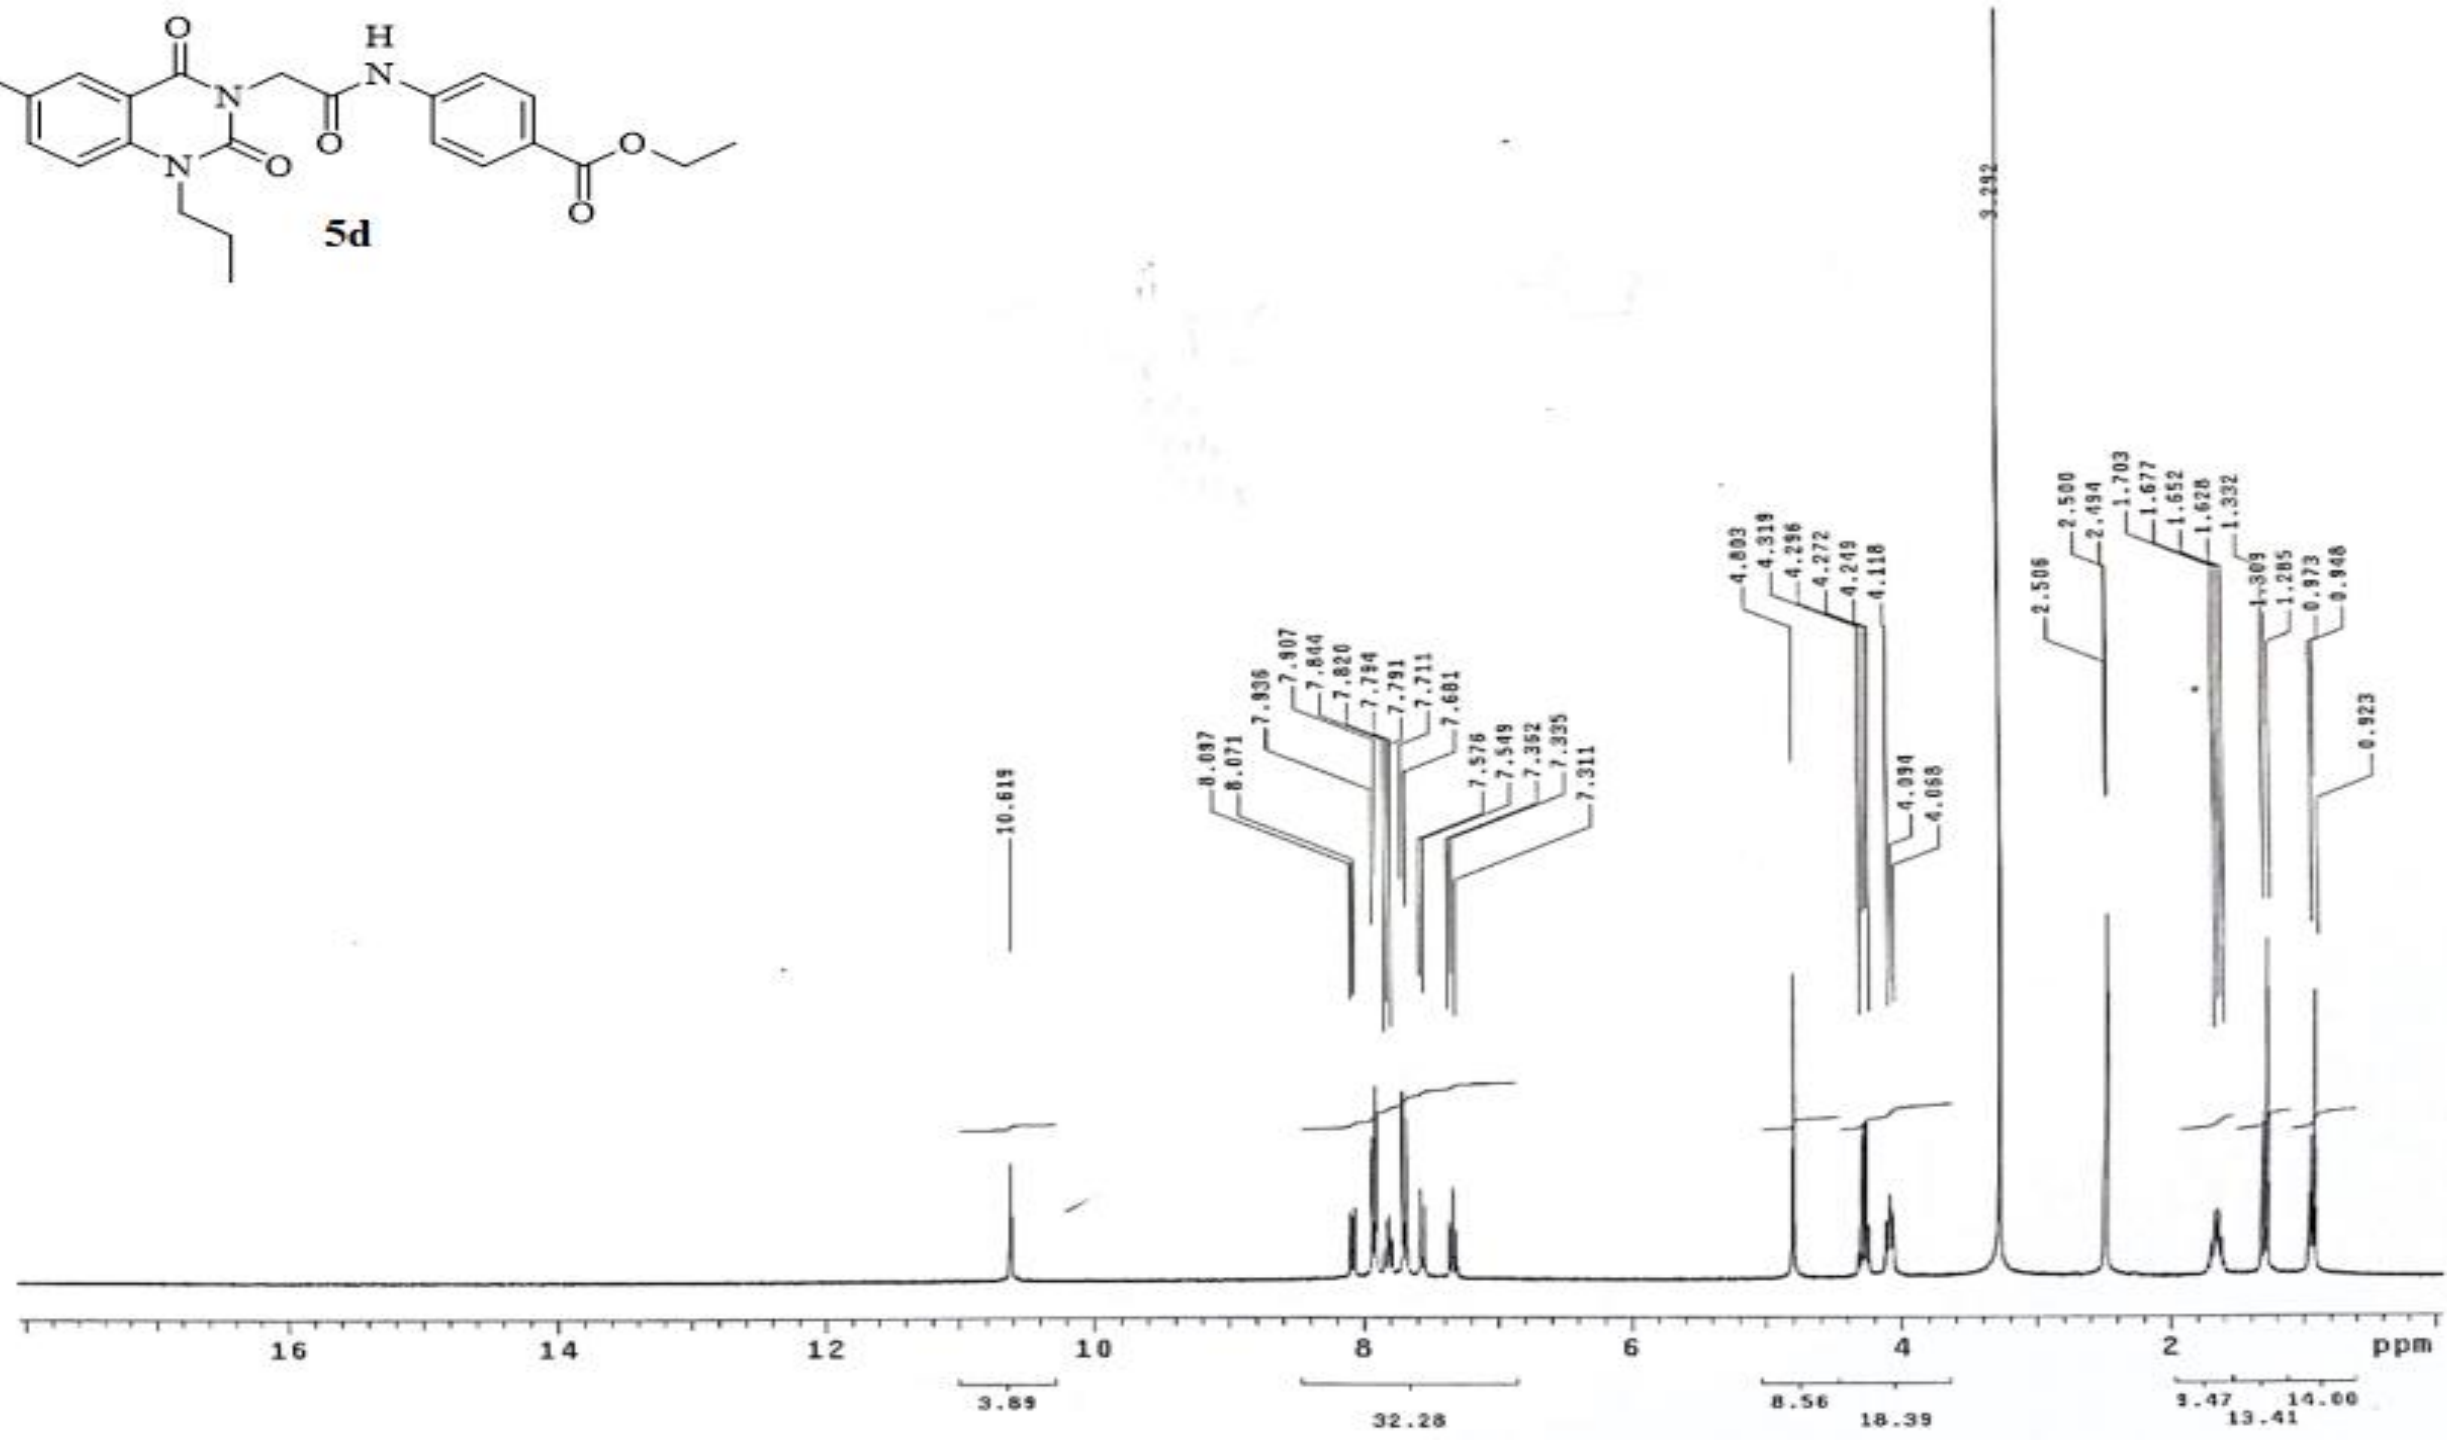

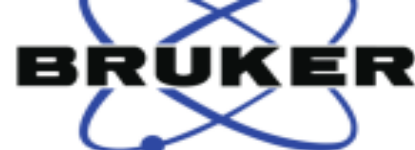

Current Data Parameters  
NAME K-1  
EXPNO 2  
PROCNO 1

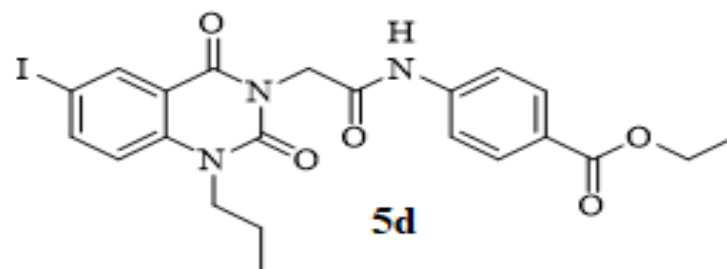

FIDRES 0.366798 Hz  
AQ 1.3631488 sec  
RG 205.37  
DW 20.800 usec  
DE 6.50 usec  
TE 300.0 K  
D1 2.00000000 sec  
D11 0.03000000 sec  
TD0 1

----- CHANNEL f1 -----  
SFO1 100.6278588 MHz  
NUC1 13C  
P1 10.00 usec  
PLW1 47.00000000 W

----- CHANNEL f2 -----  
SFO2 400.1516006 MHz  
NUC2 1H  
CPDPRG[2] waltz16  
PCPD2 90.00 usec  
PLW2 18.00000000 W  
PLW12 0.34722000 W  
PLW13 0.28125000 W

F2 - Processing parameters  
SI 32768  
SF 100.6177975 MHz  
WDW EM  
SSB 0  
LB 1.00 Hz  
GB 0  
PC 1.40

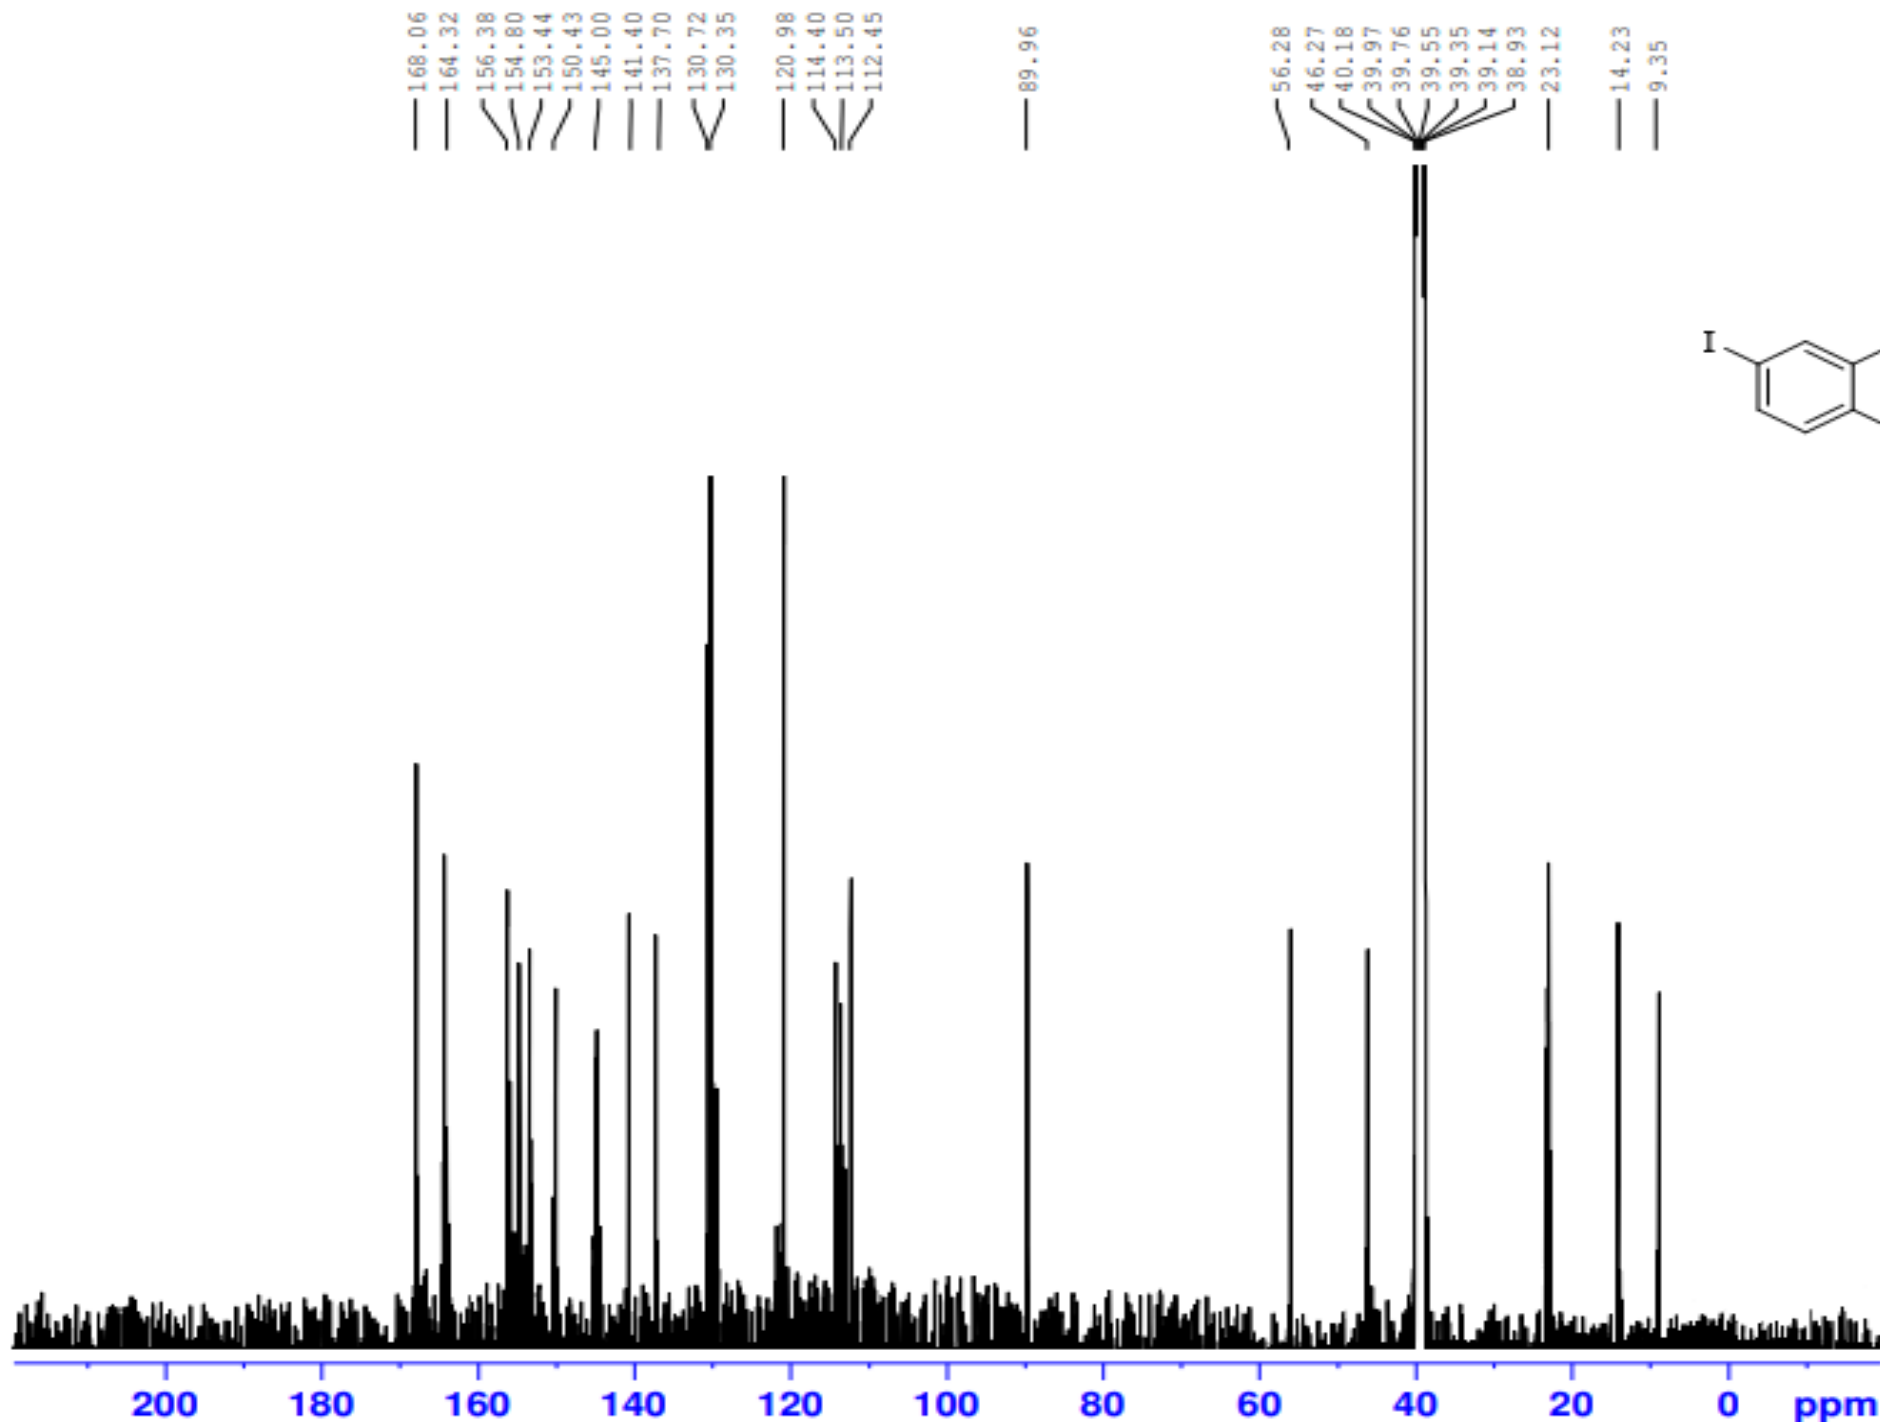

% Transmittance

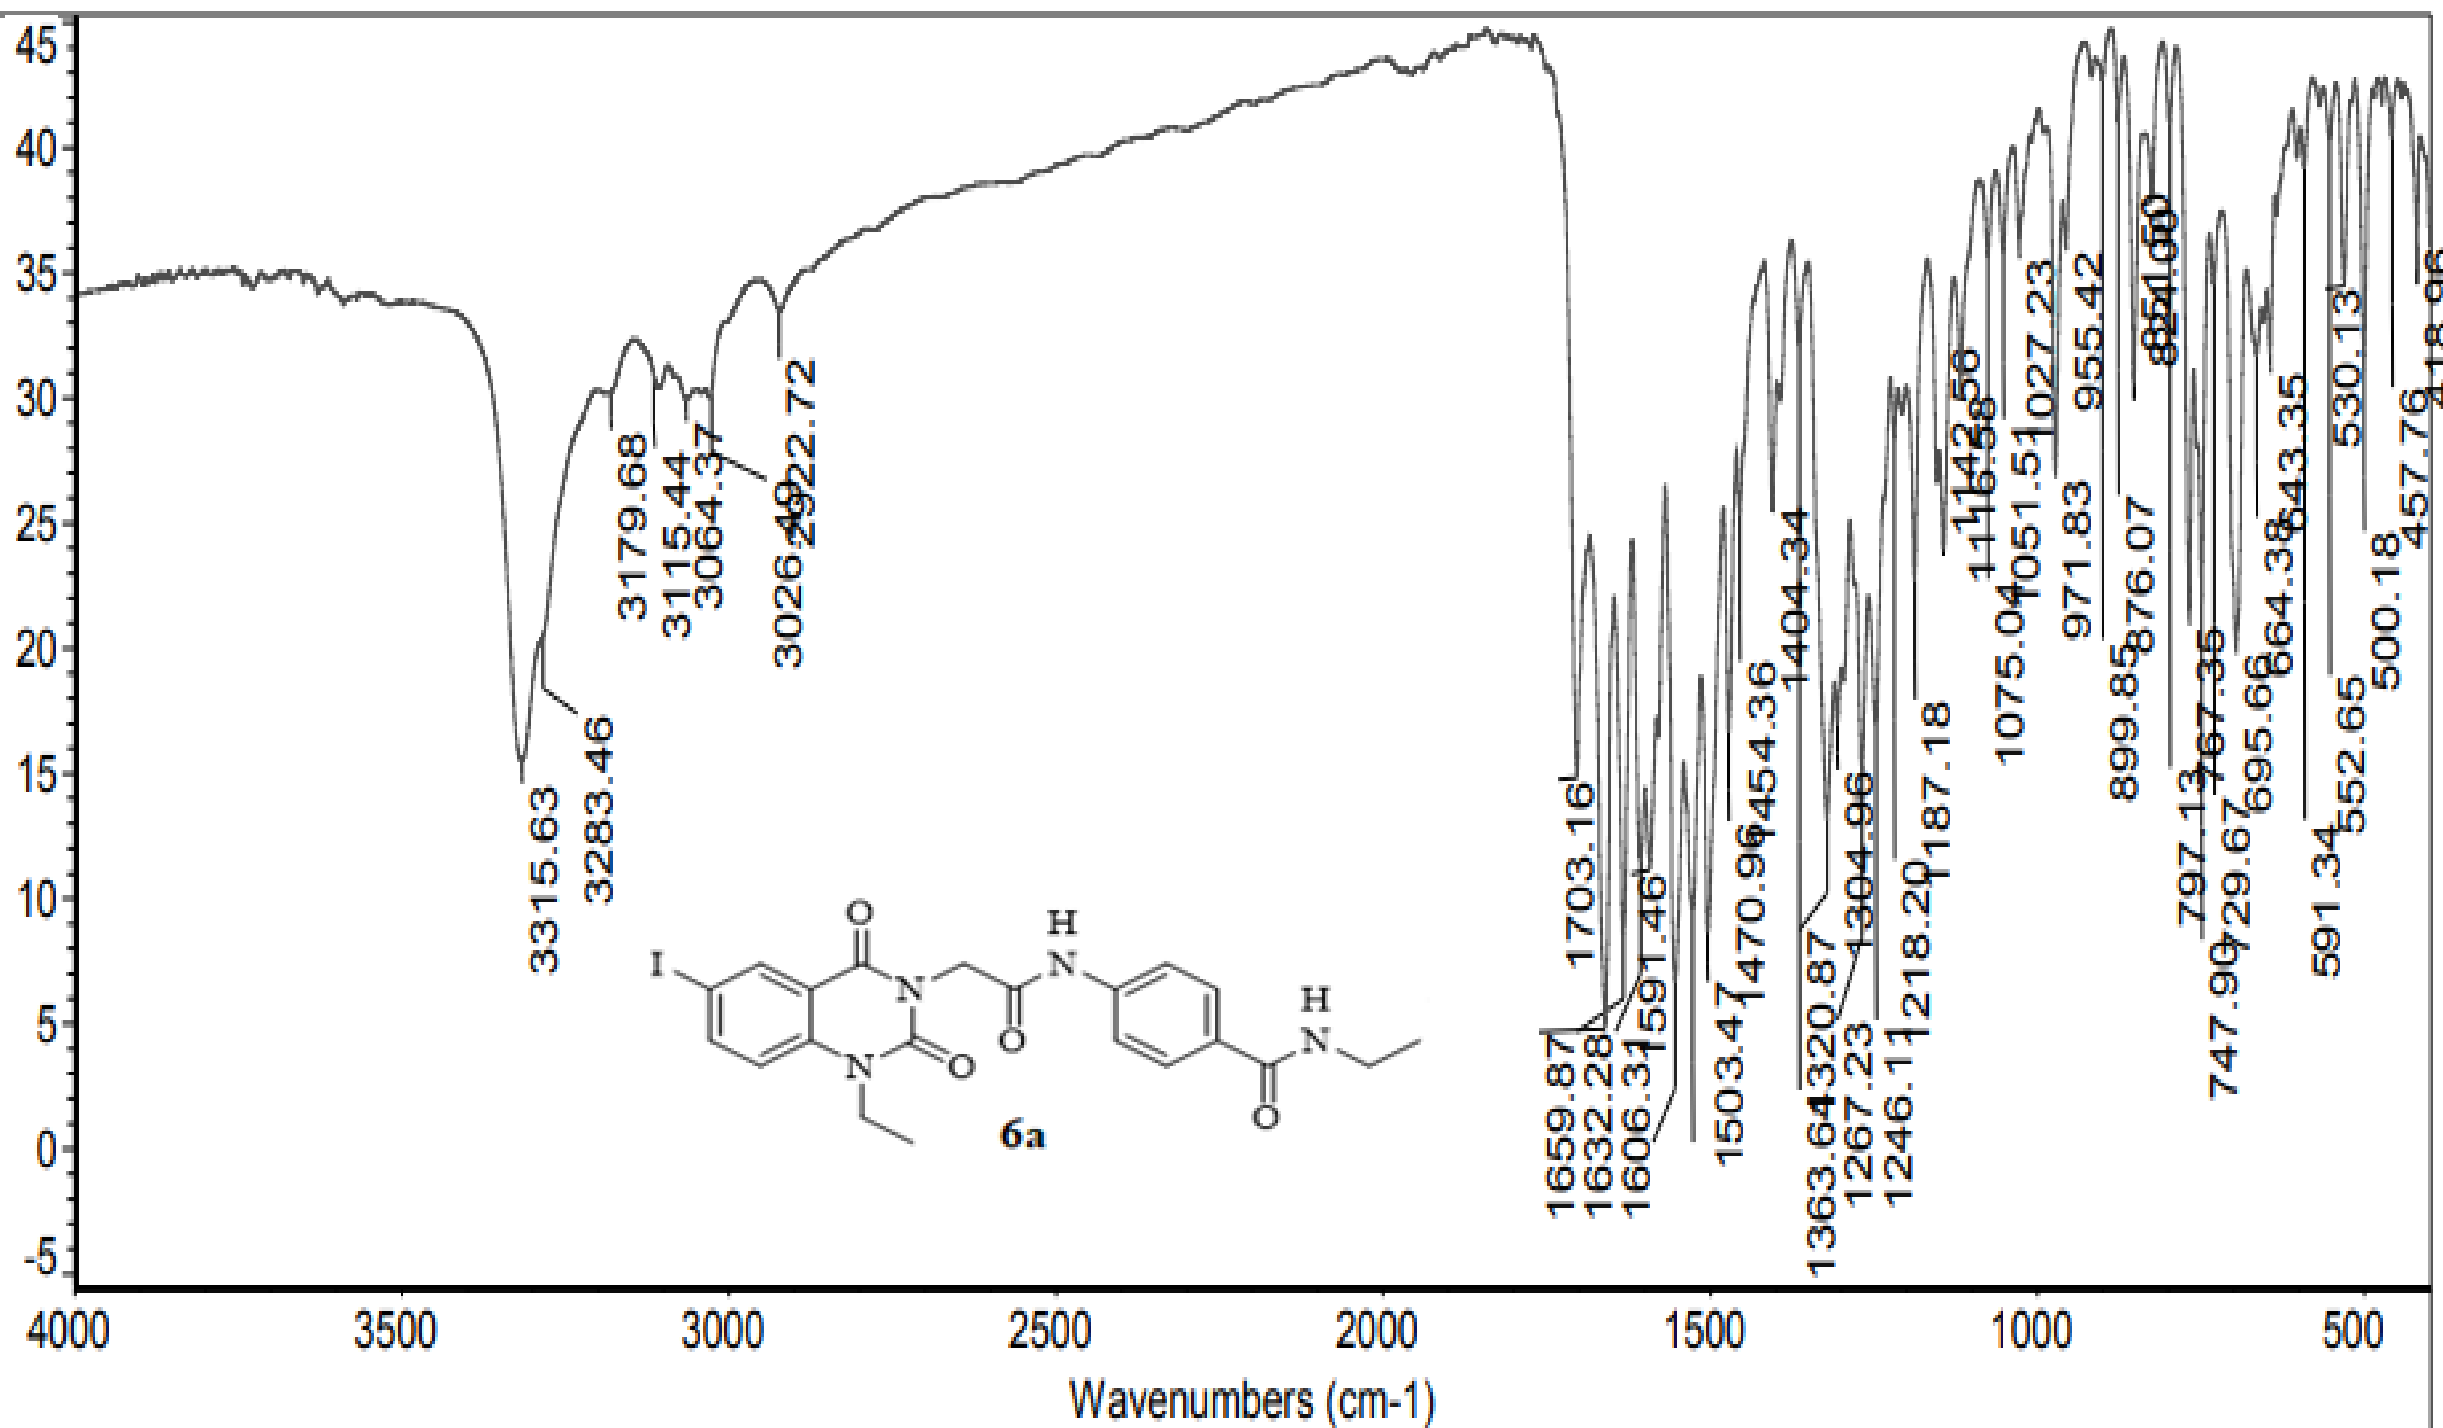

Relax. delay 1.000 sec  
 Pulse 74.1 degrees  
 Acq. time 4.064 sec  
 Width 8000.0 Hz  
 11 repetitions  
 OBSERVE M1, 300.0687675 MHz  
 DATA PROCESSING  
 FT size 65536  
 Total time 19 min, 19 sec

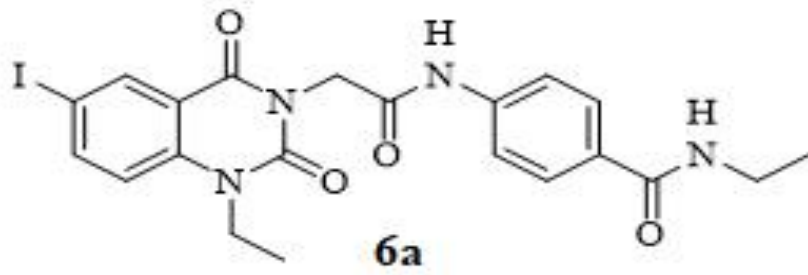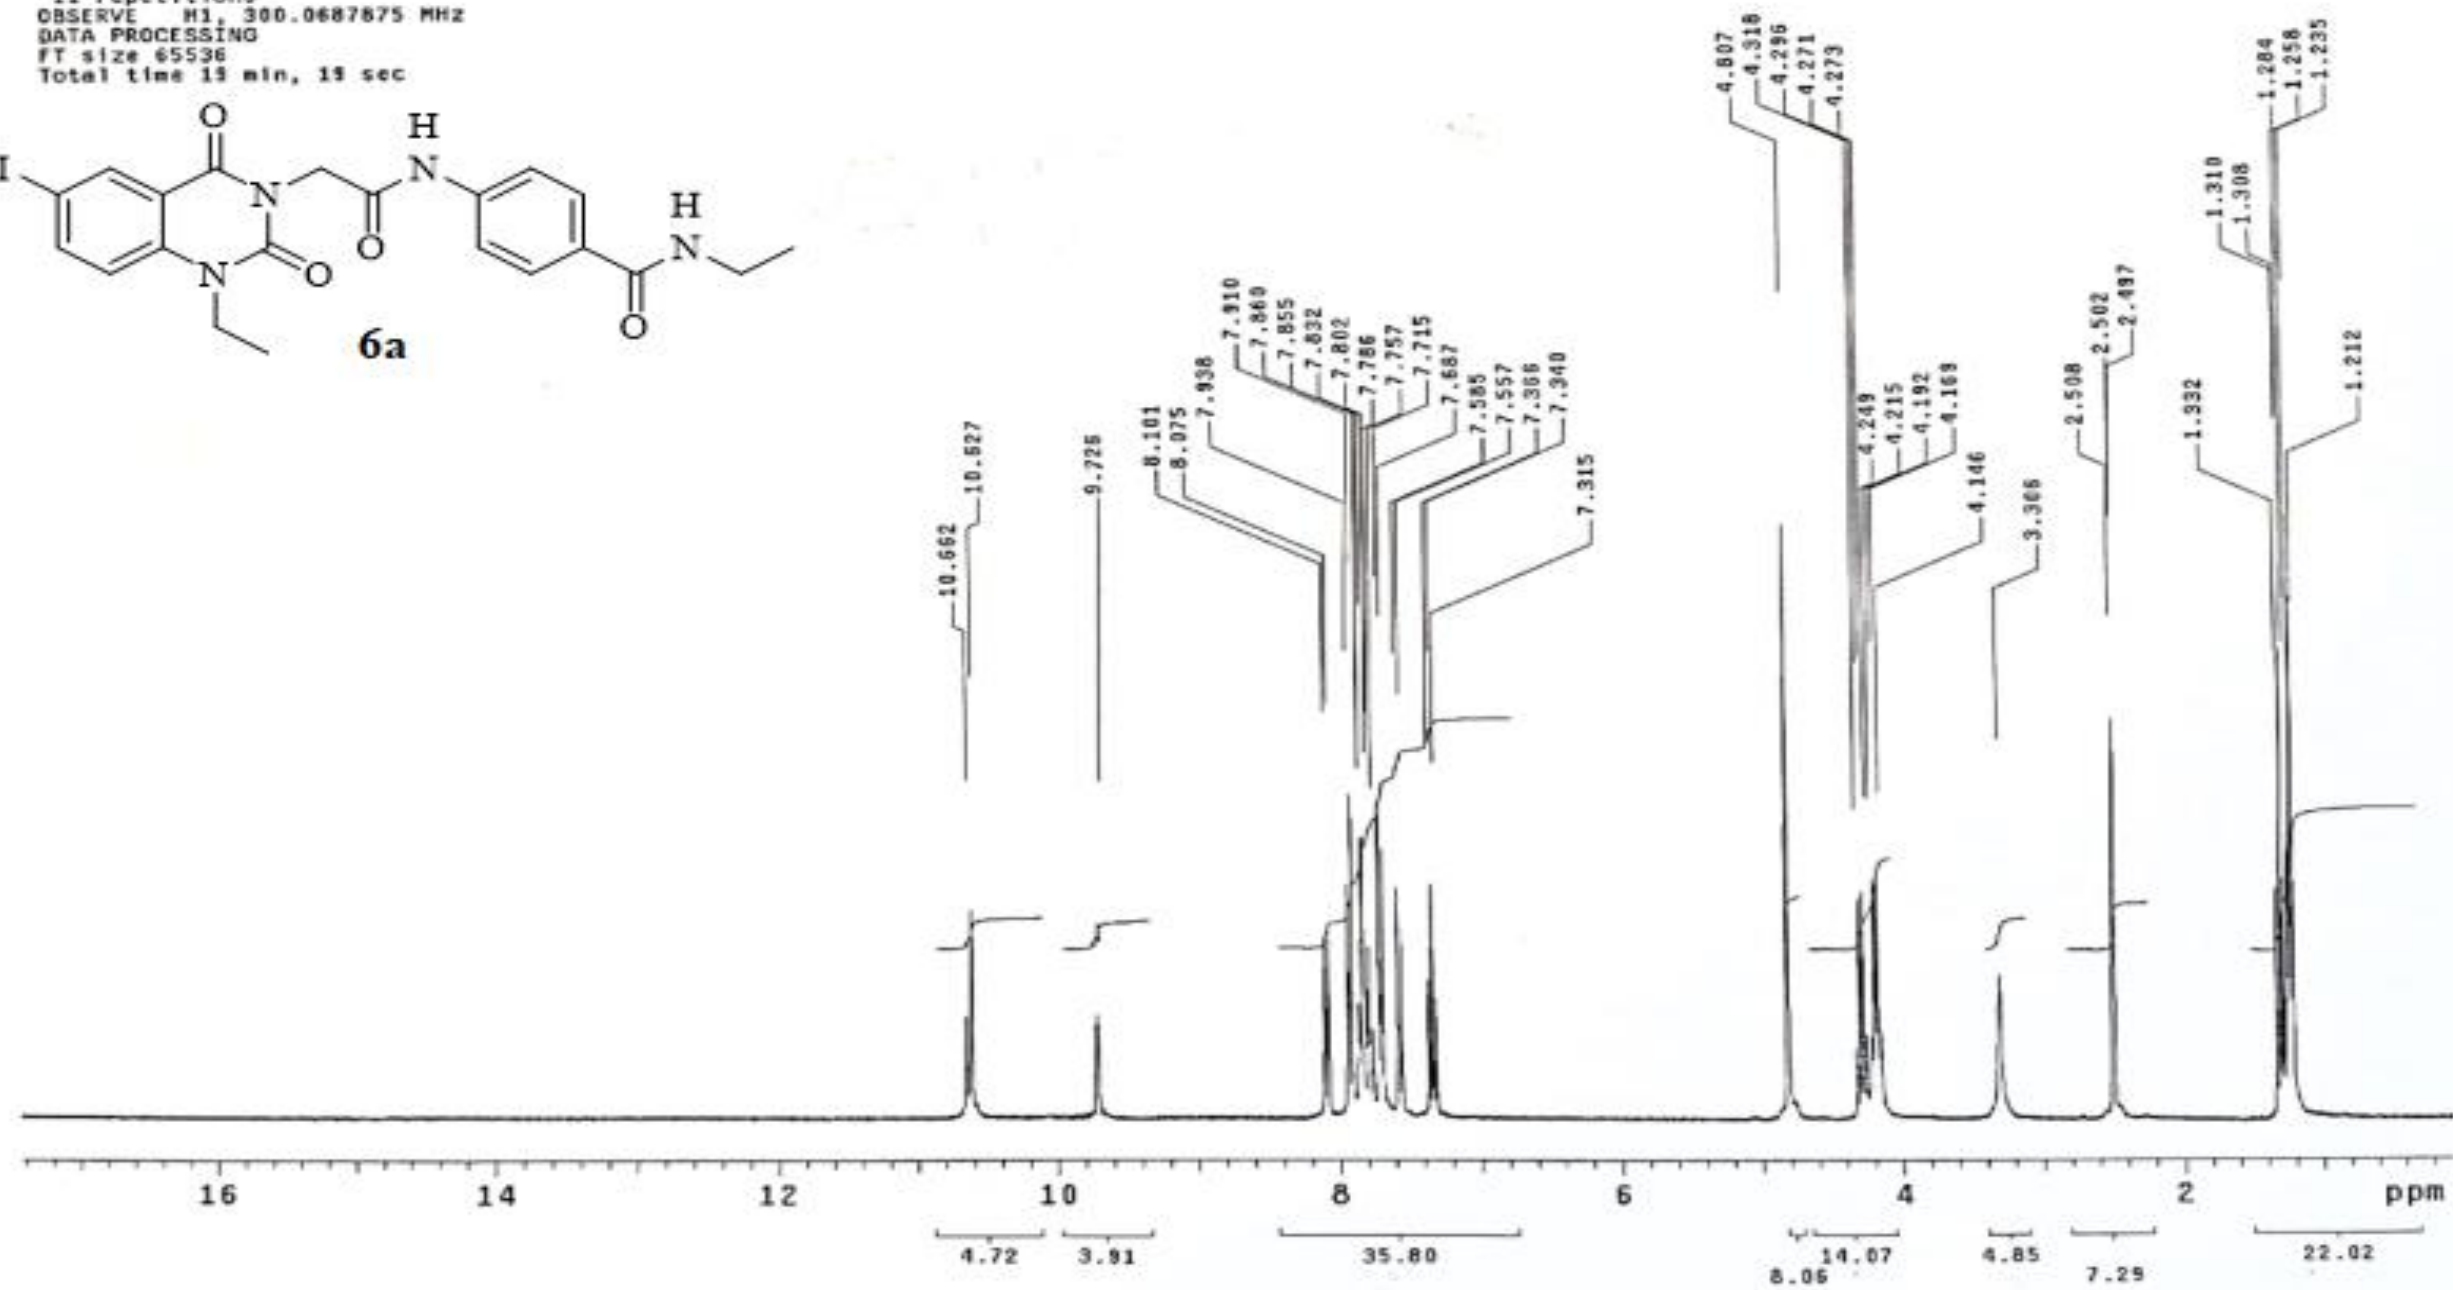



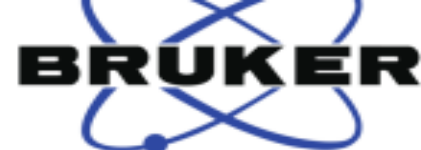

Current Data Parameters  
NAME K-E  
EXPNO 2  
PROCNO 1

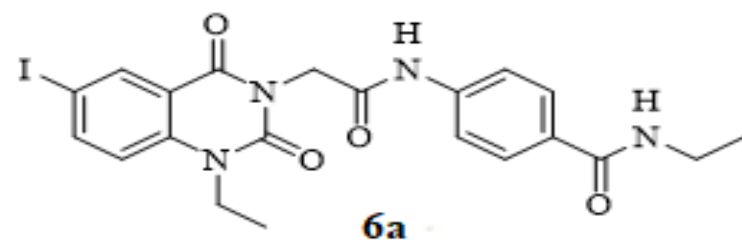

-----  
AQ 0.300750 sec  
RG 1.3631488 sec  
DW 205.37  
DE 20.800 usec  
TE 6.50 usec  
D1 300.0 K  
D11 2.00000000 sec  
D11 0.03000000 sec  
TD0 1

----- CHANNEL f1 -----  
SFO1 100.6278588 MHz  
NUC1 13C  
P1 10.00 usec  
PLW1 47.00000000 W

----- CHANNEL f2 -----  
SFO2 400.1516006 MHz  
NUC2 1H  
CPDPRG[2] waltz16  
PCPD2 90.00 usec  
PLW2 18.00000000 W  
PLW12 0.34722000 W  
PLW13 0.28125000 W

F2 - Processing parameters  
SI 32768  
SF 100.6177975 MHz  
WDW EM  
SSB 0  
LB 1.00 Hz  
GB 0  
PC 1.40

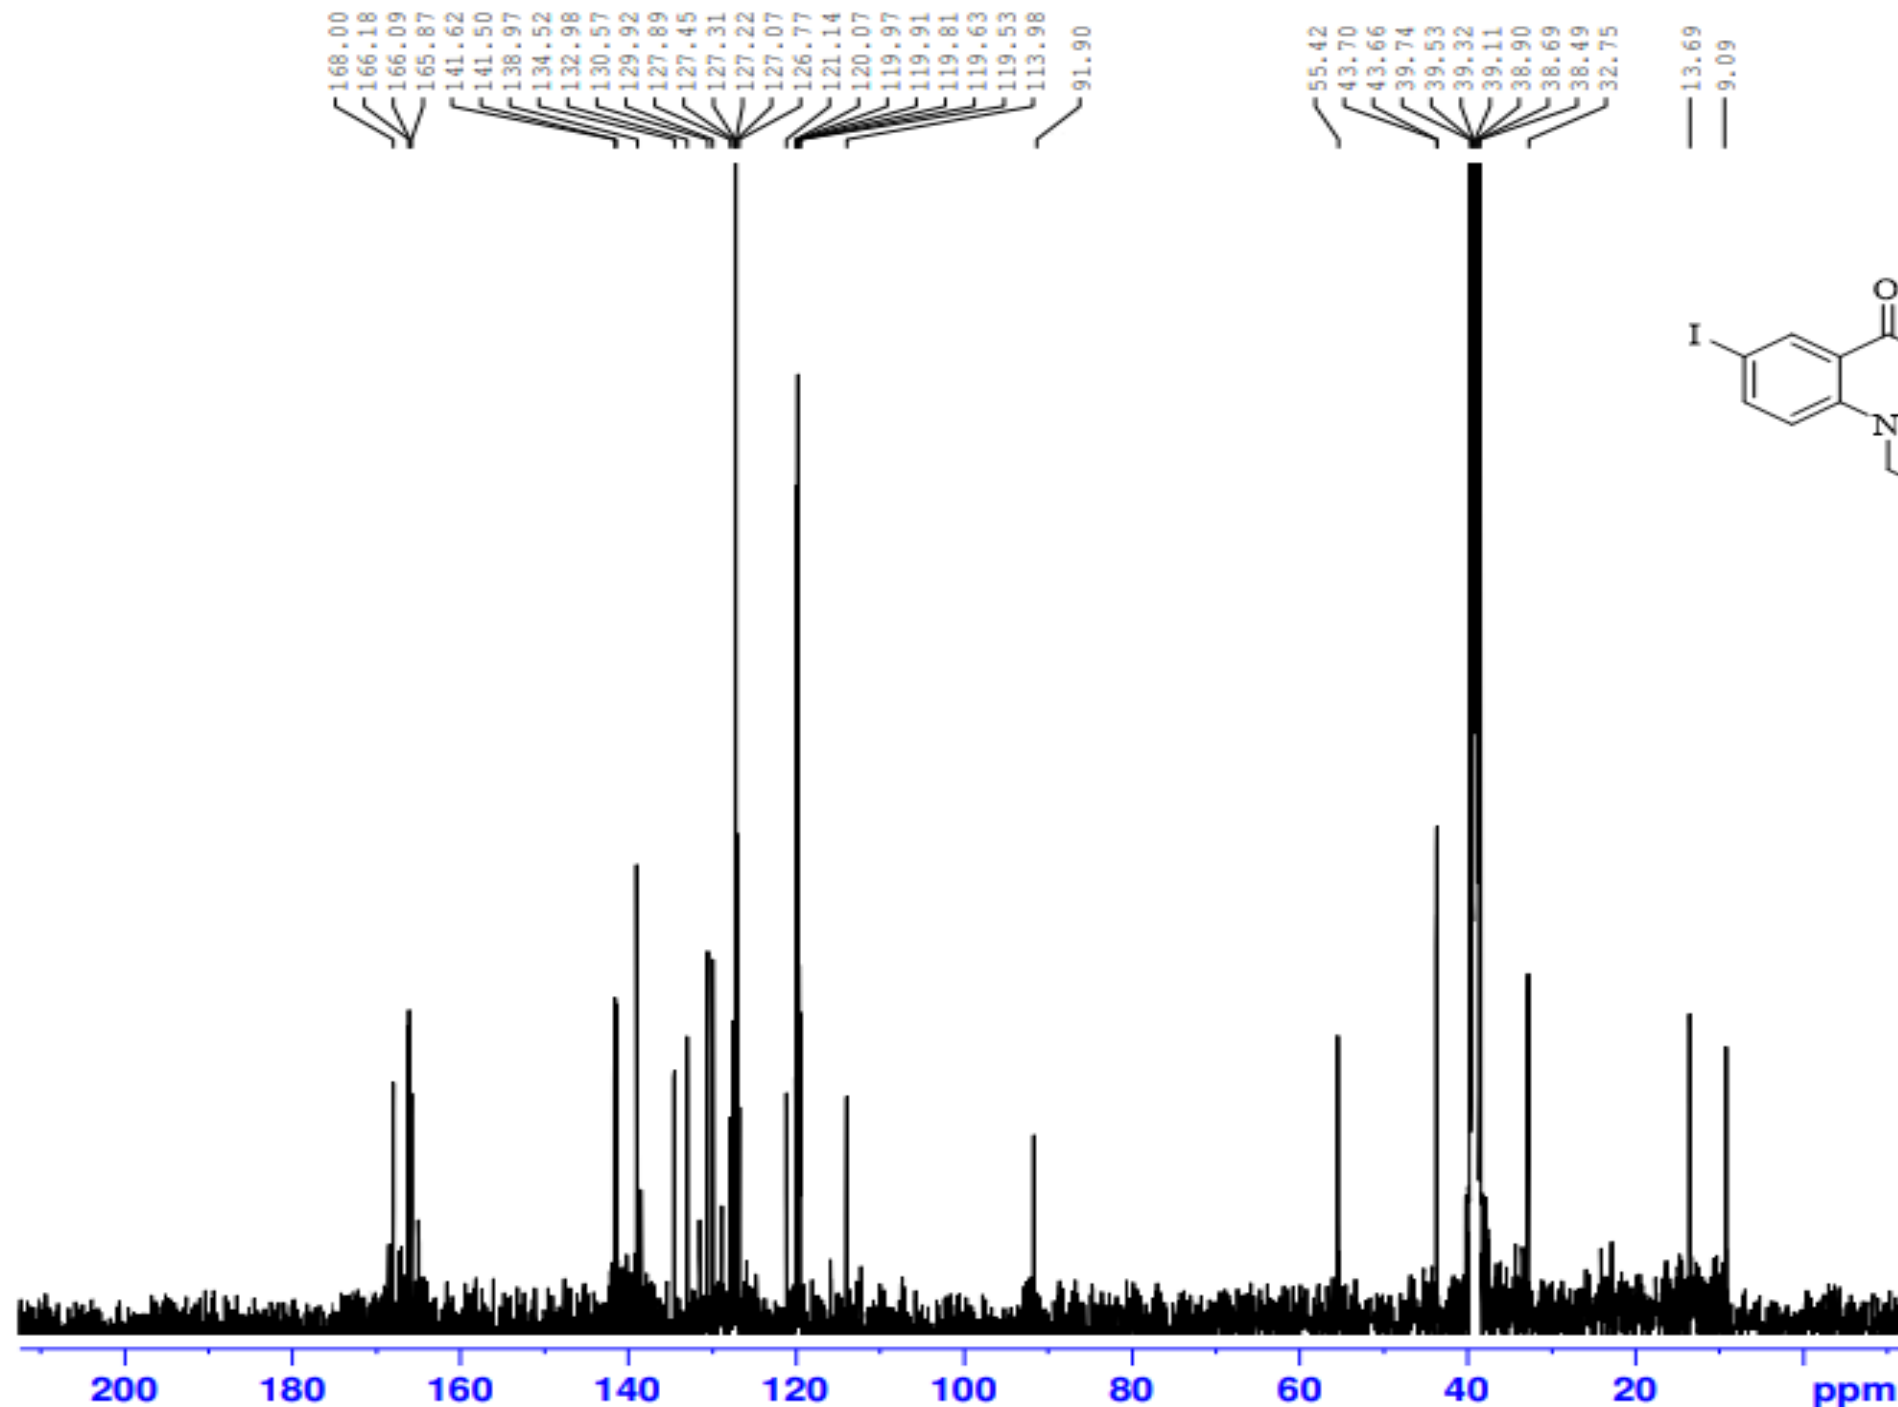

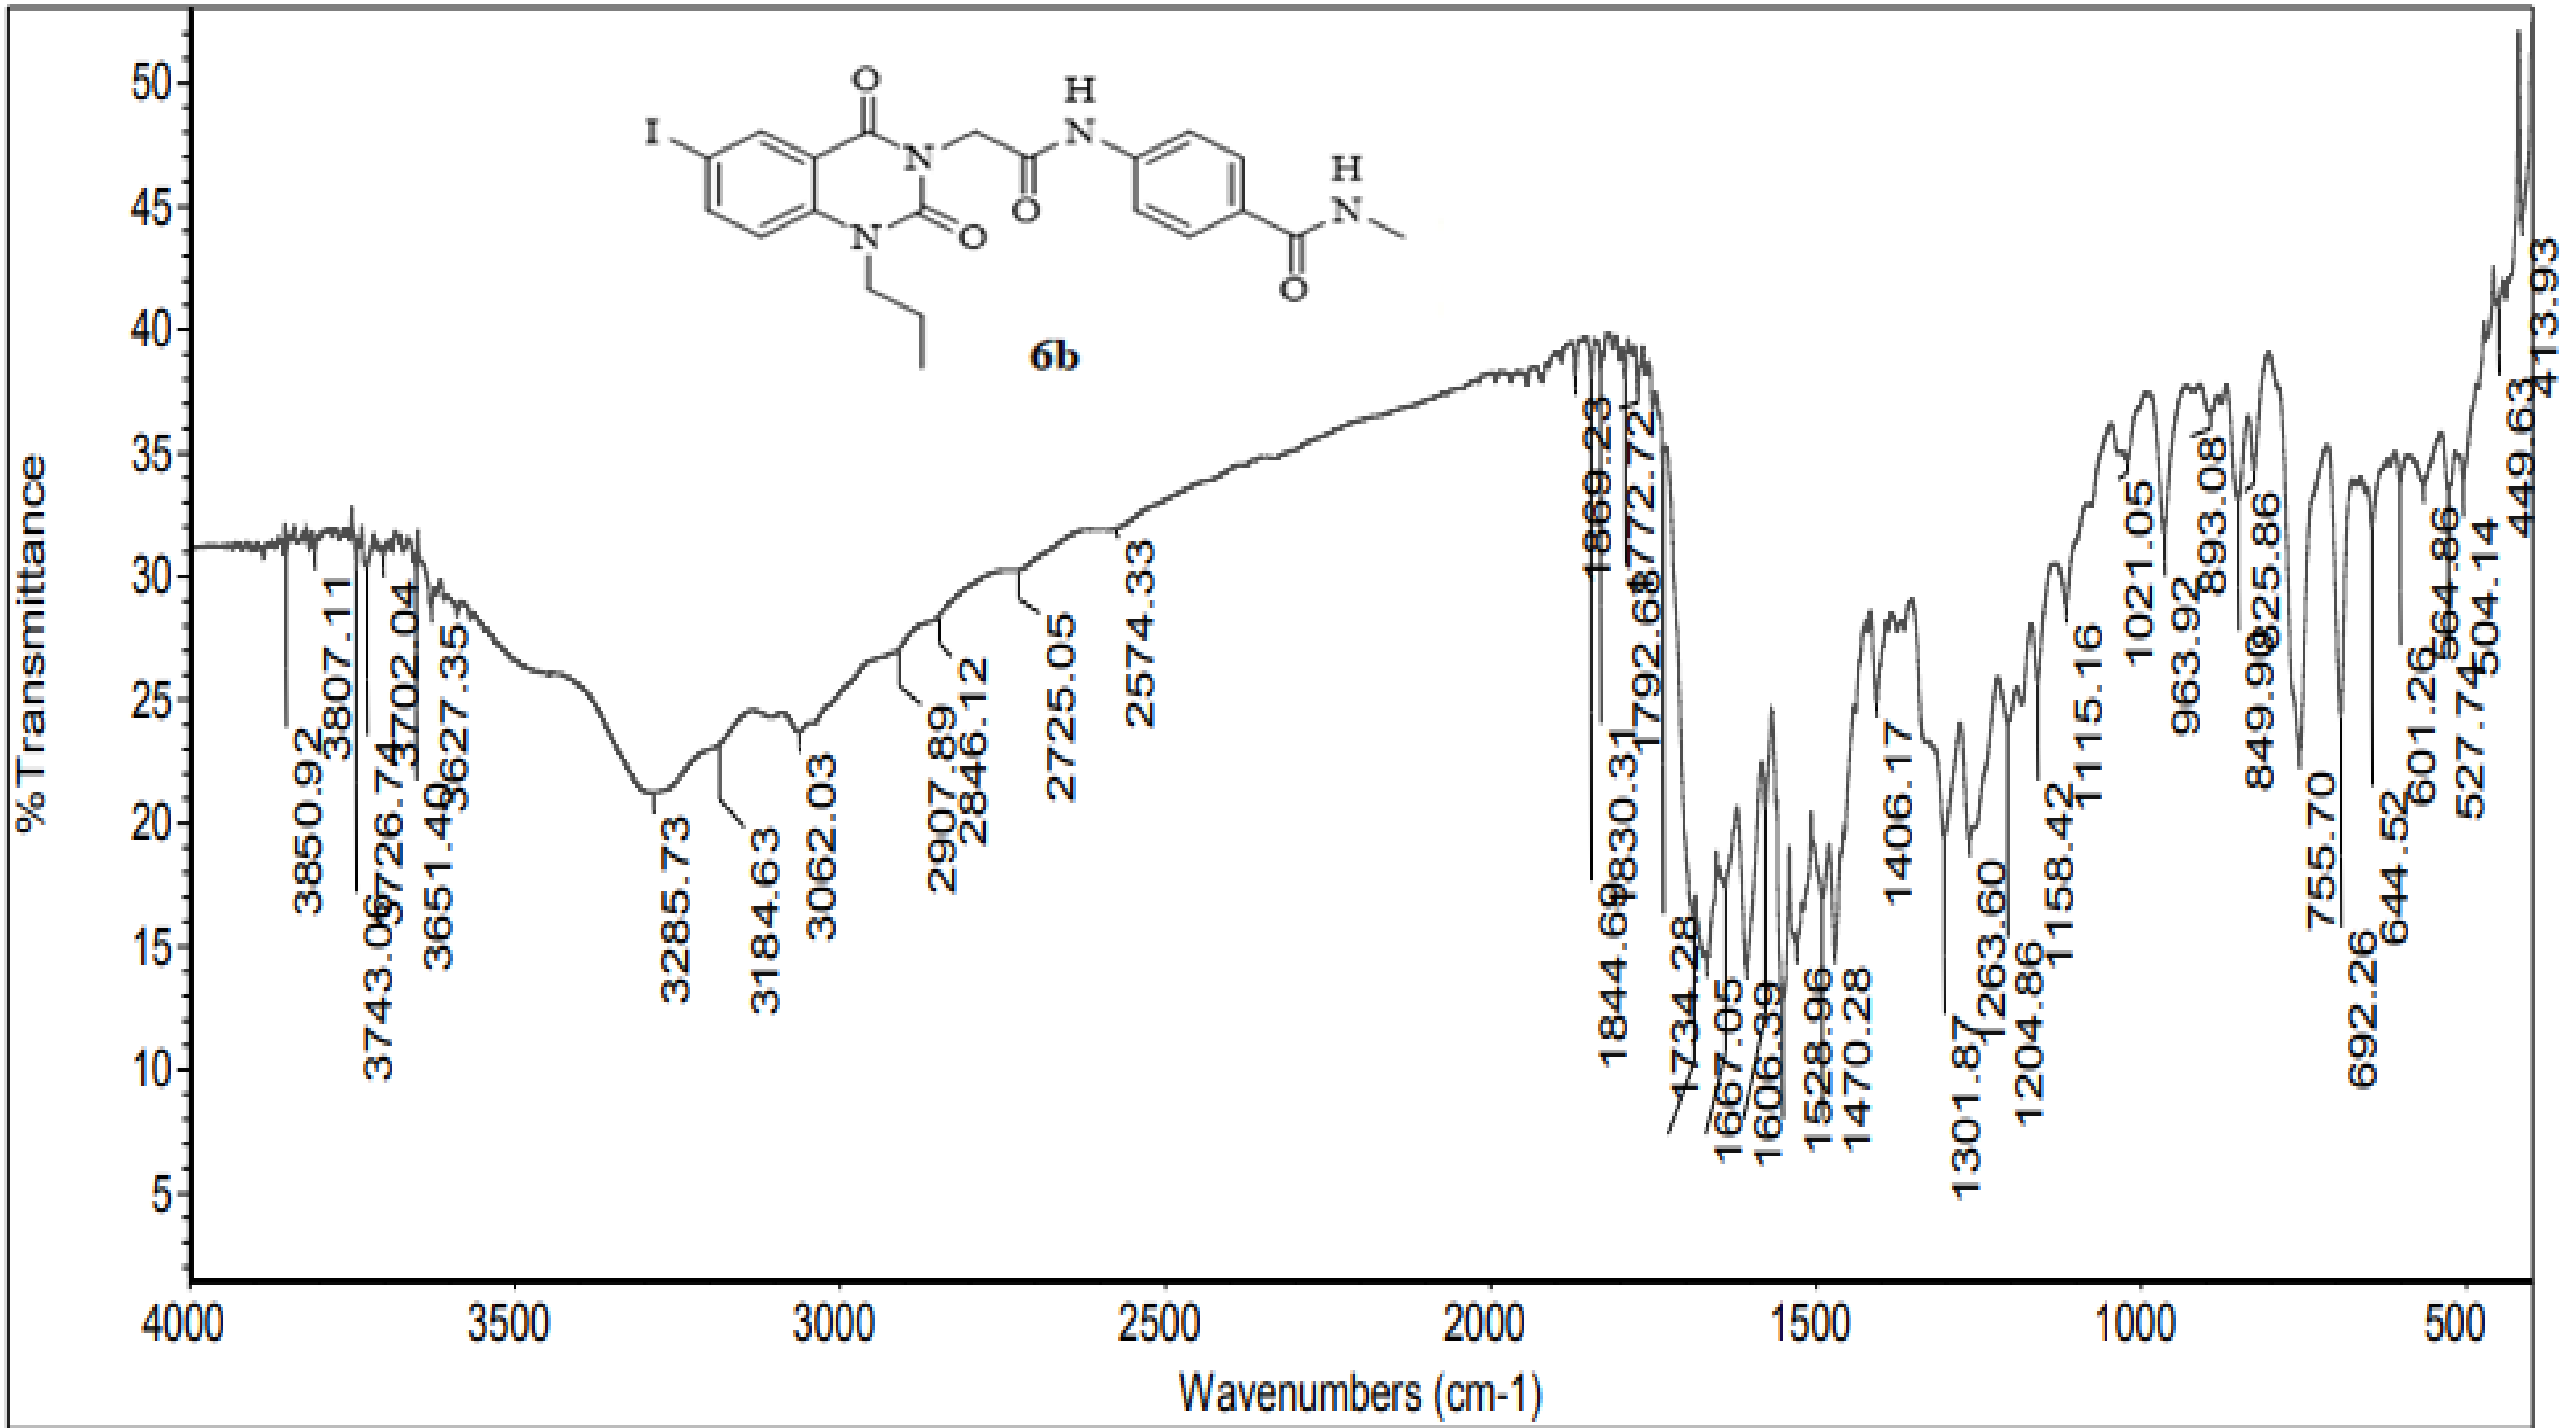

Relax. delay 1.000 sec  
 Pulse 74.1 degree  
 Acq. time 4.004  
 Width 8000.0 Hz  
 11 repetitions  
 OBSERVE M1 300  
 DATA PROCESSING  
 FT size 65536  
 Total time 19 min

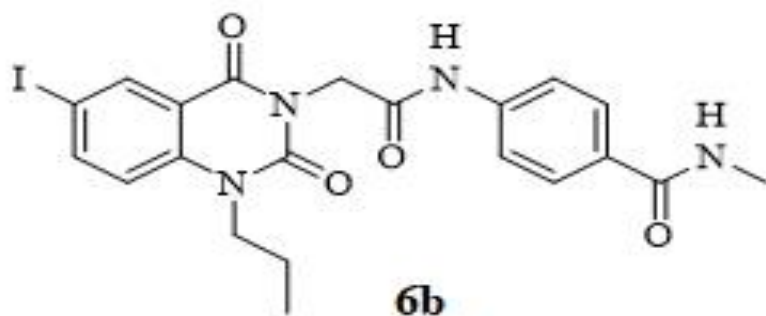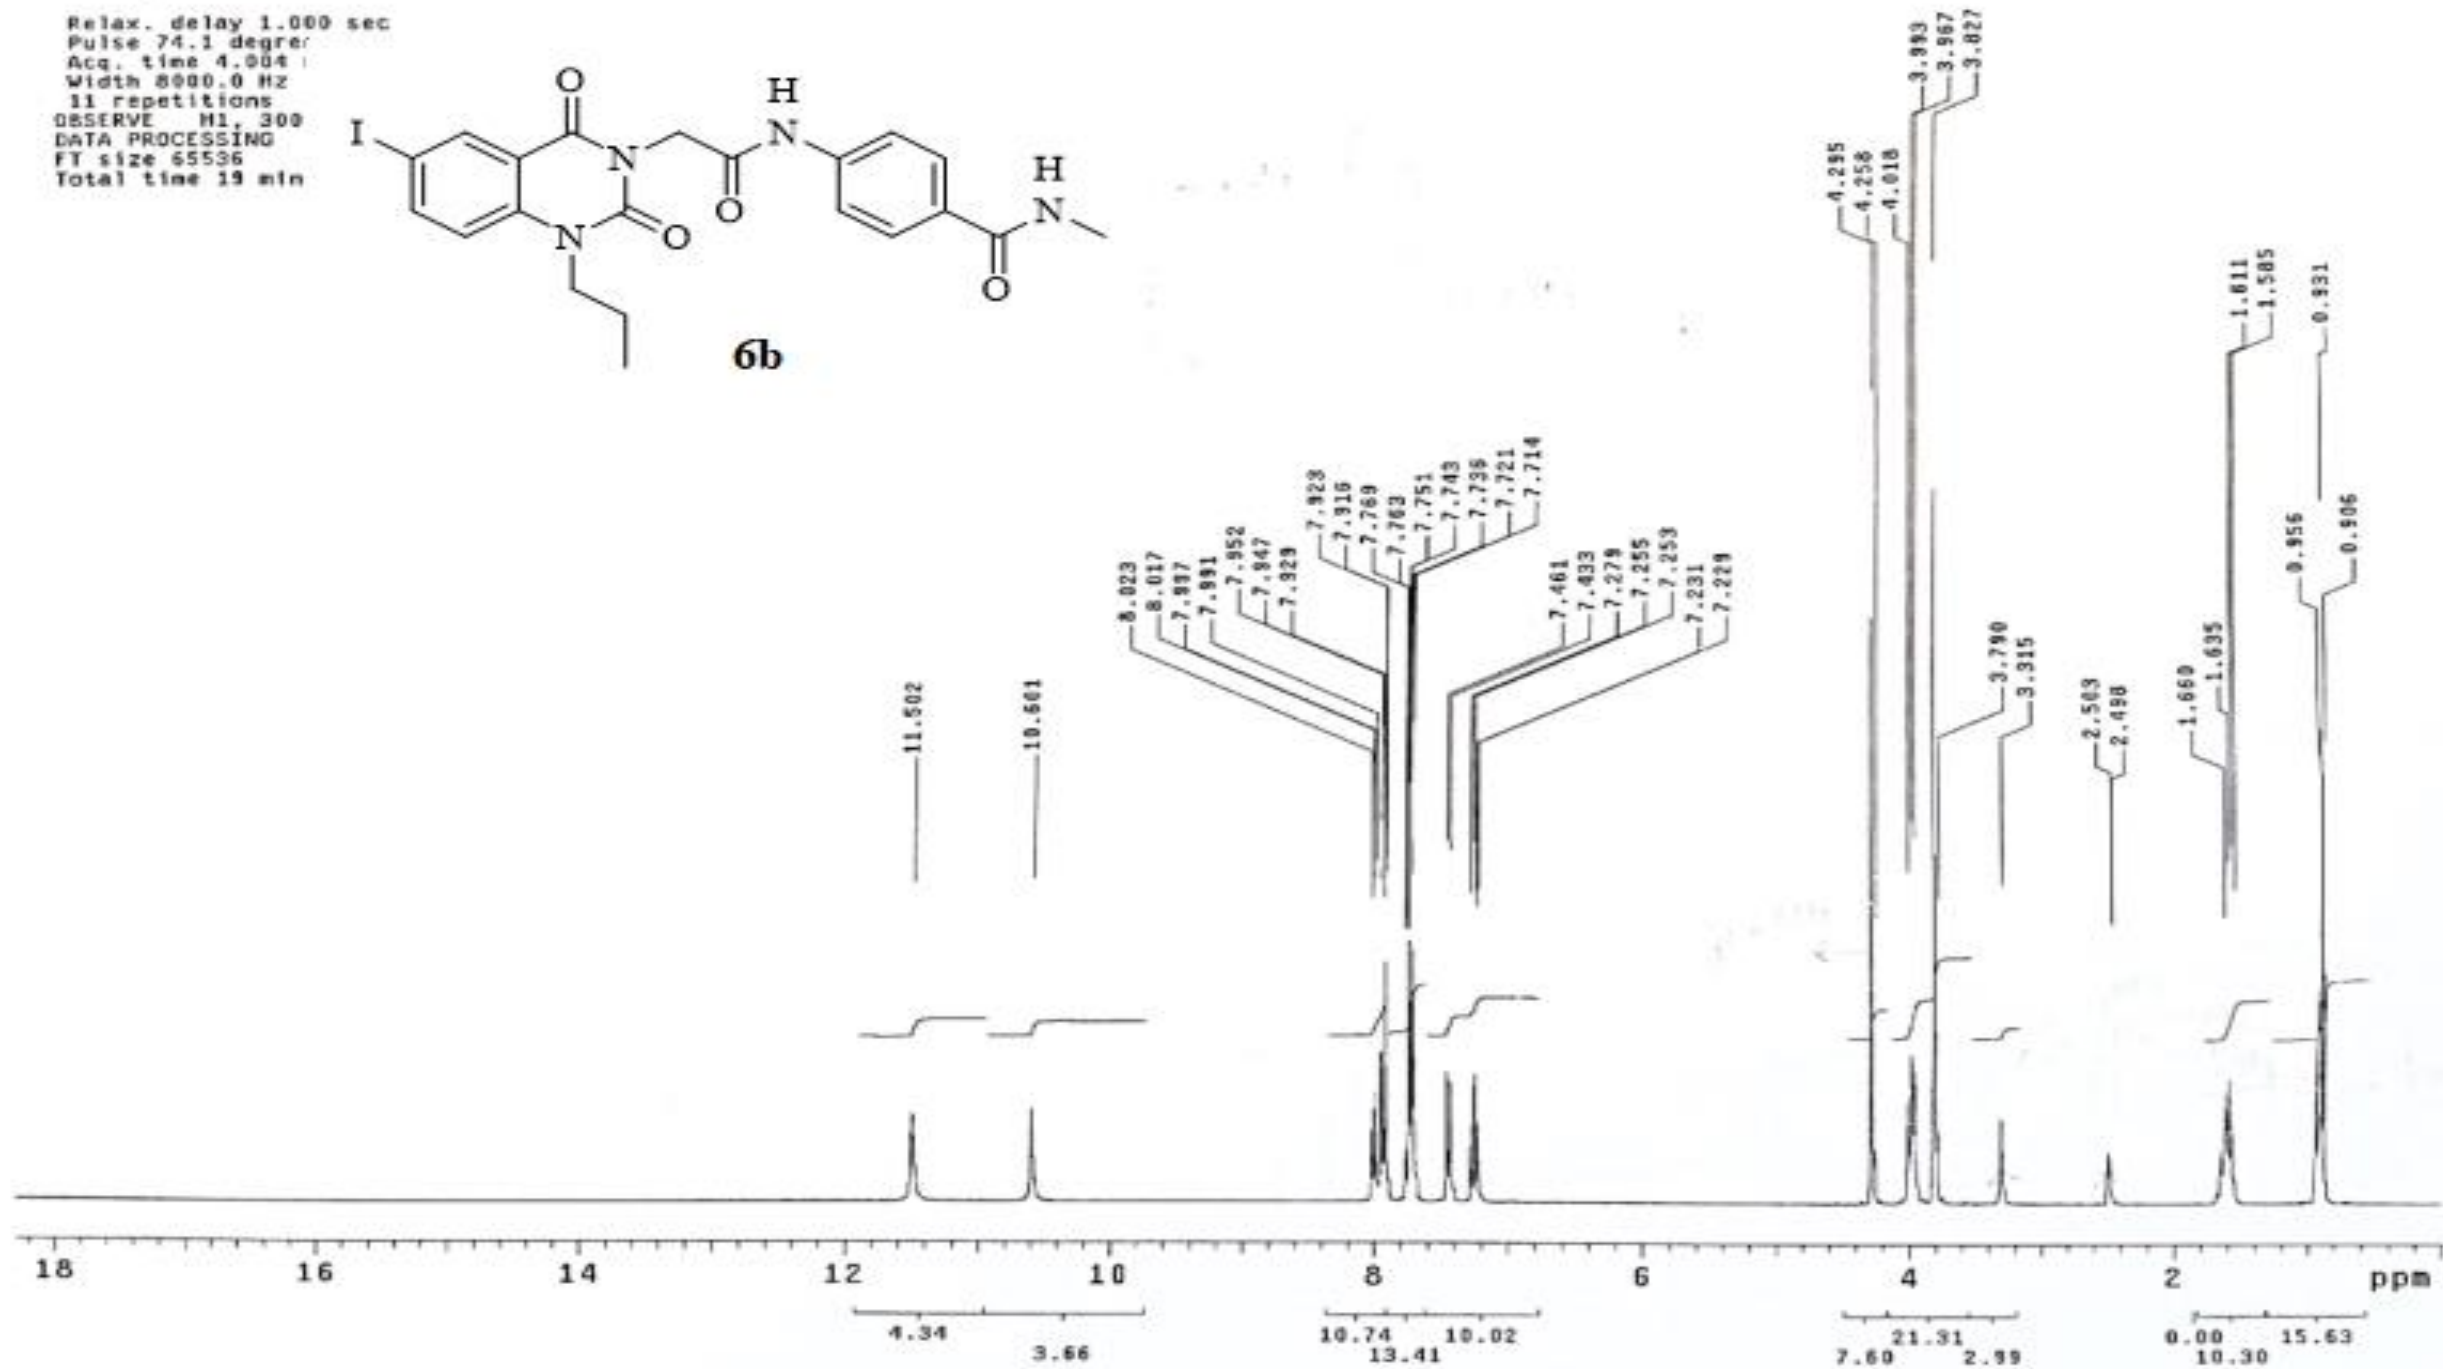

Relative Abundance

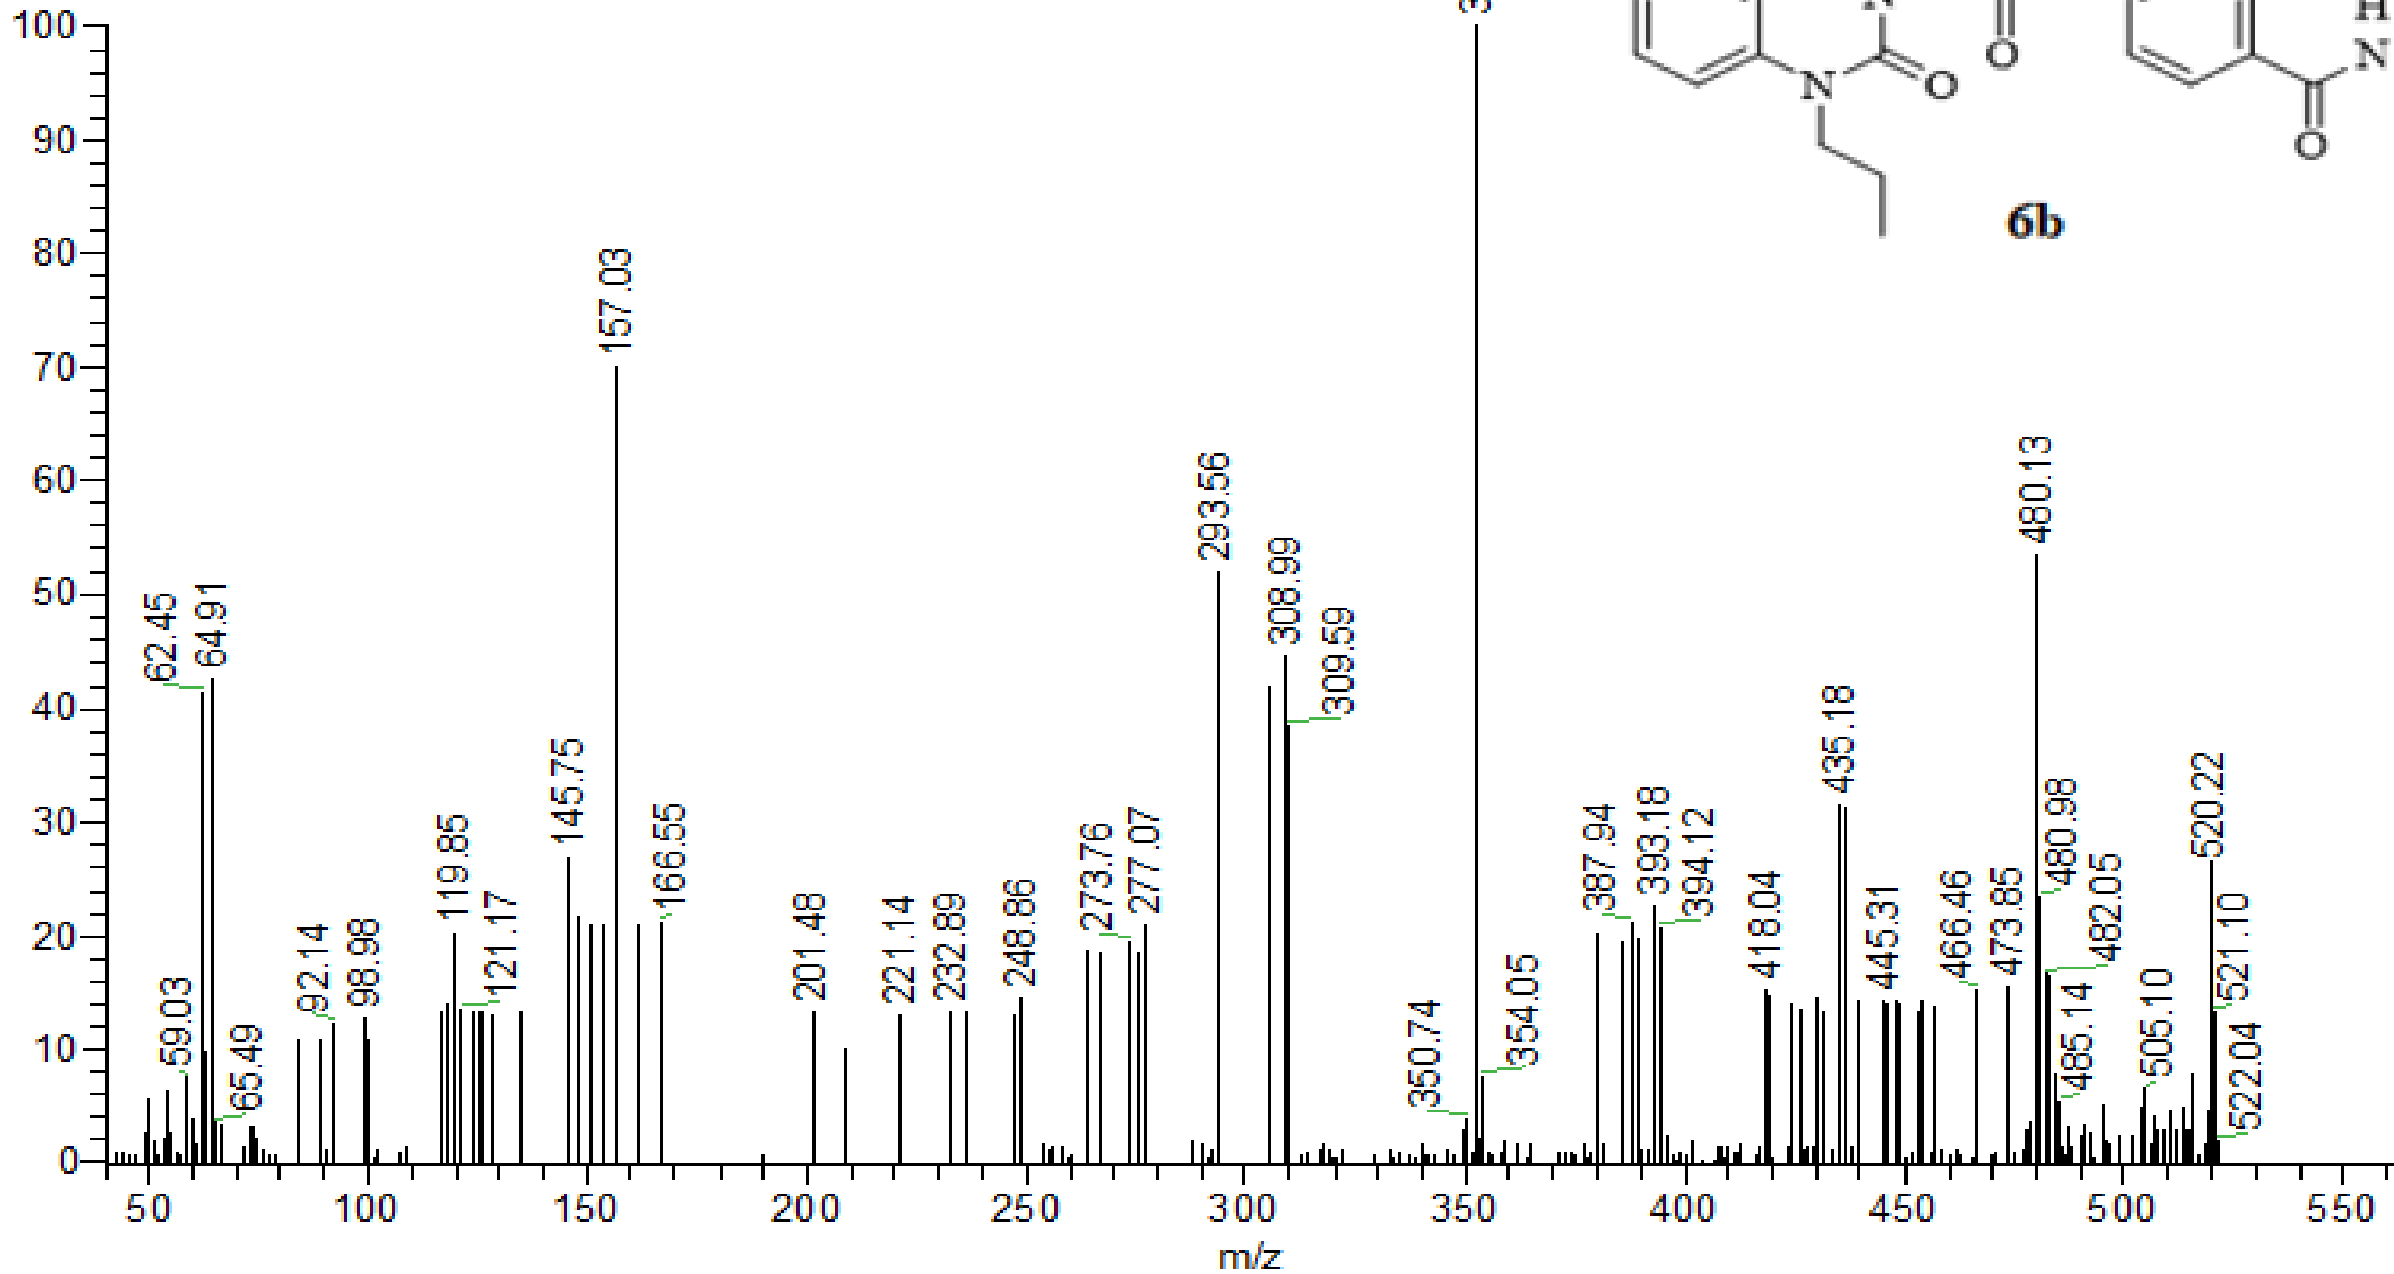

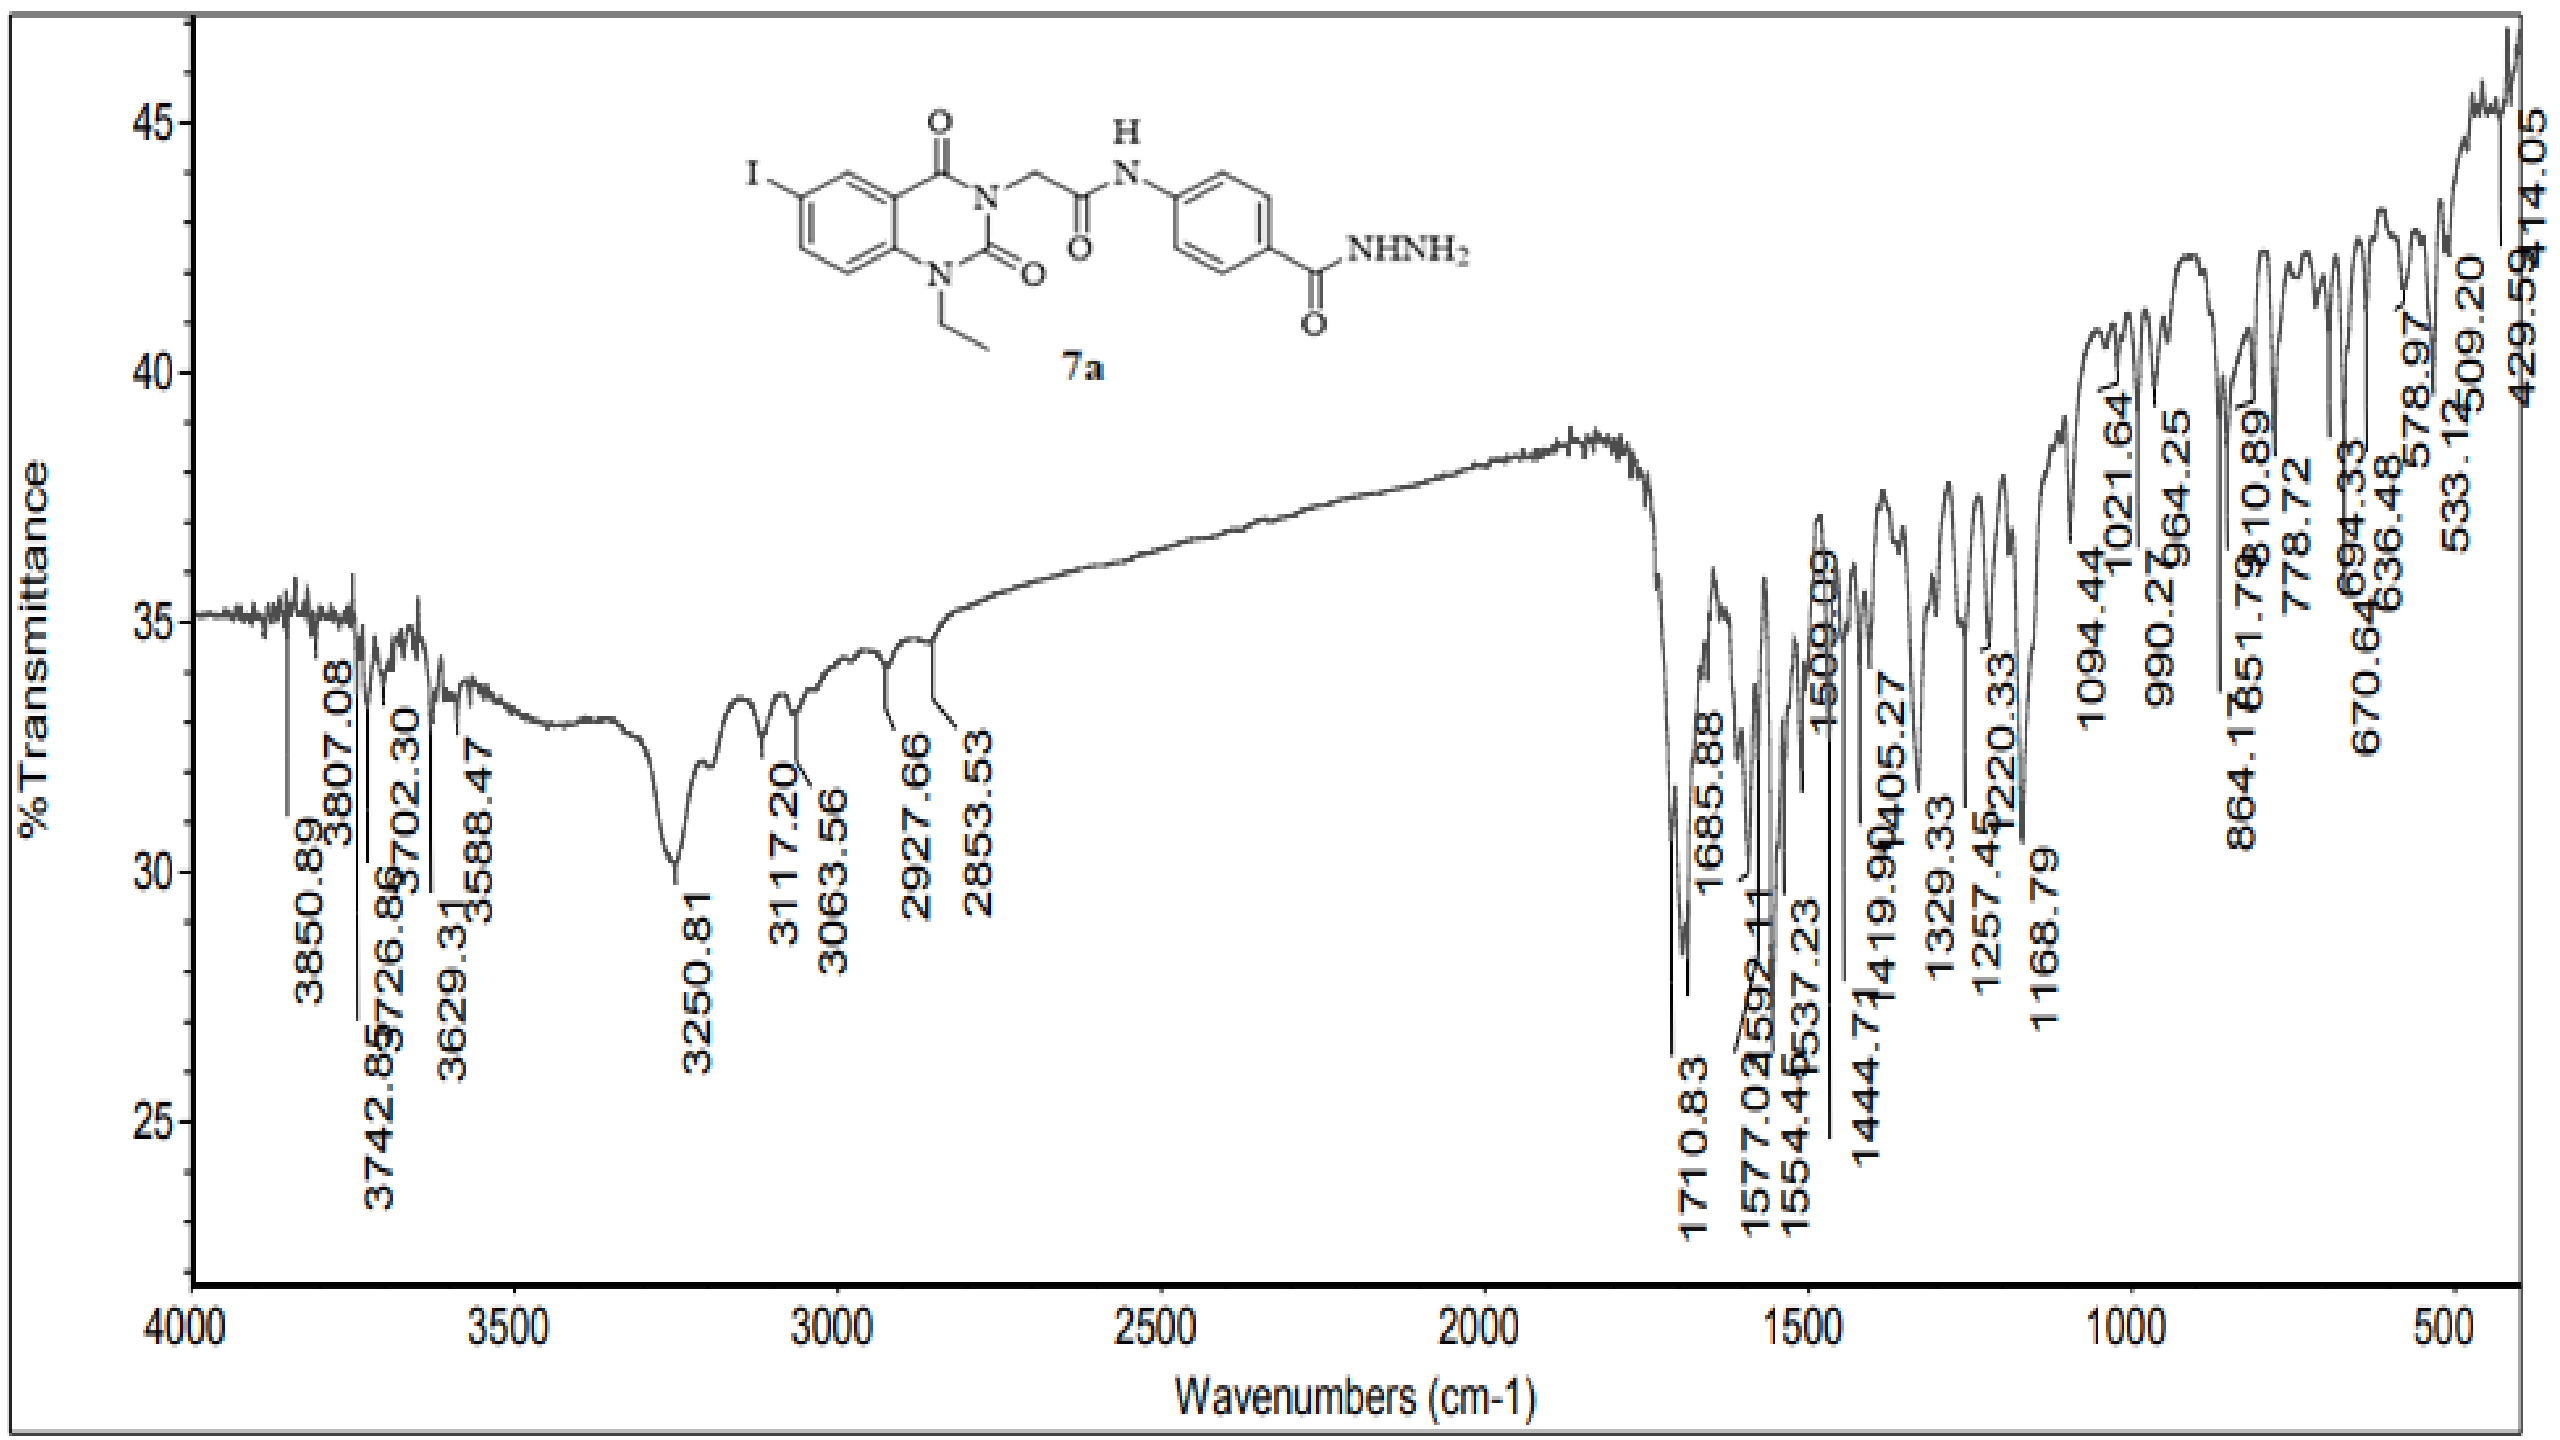

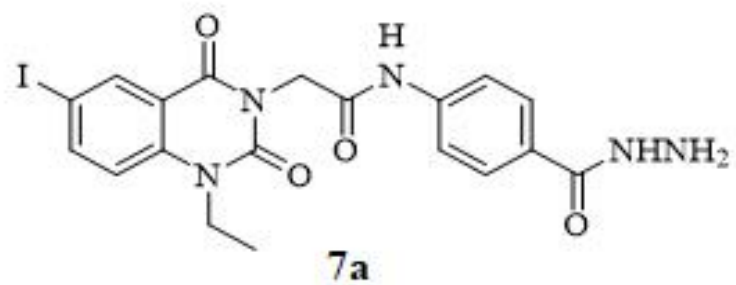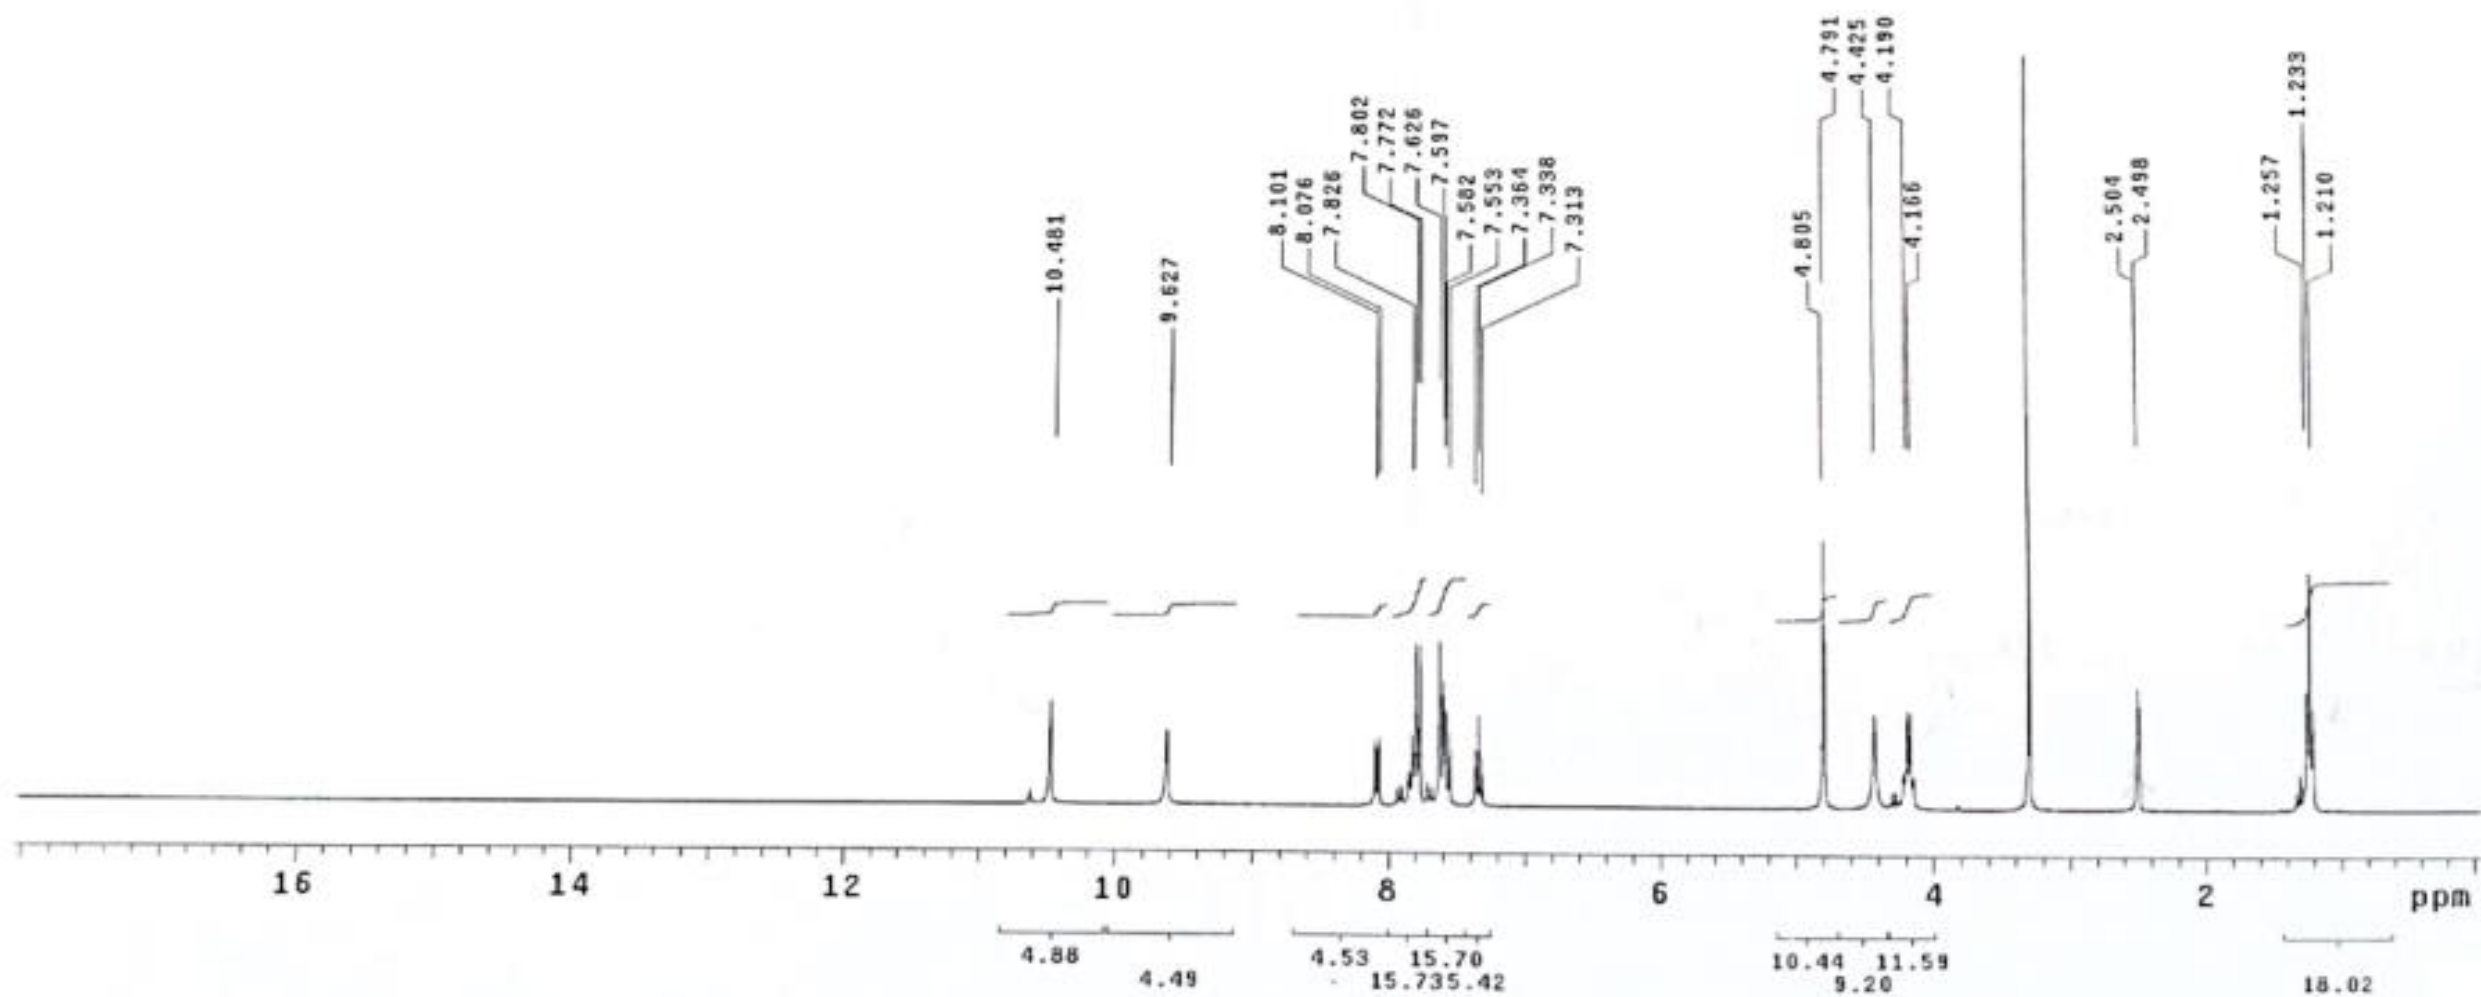

% Transmittance

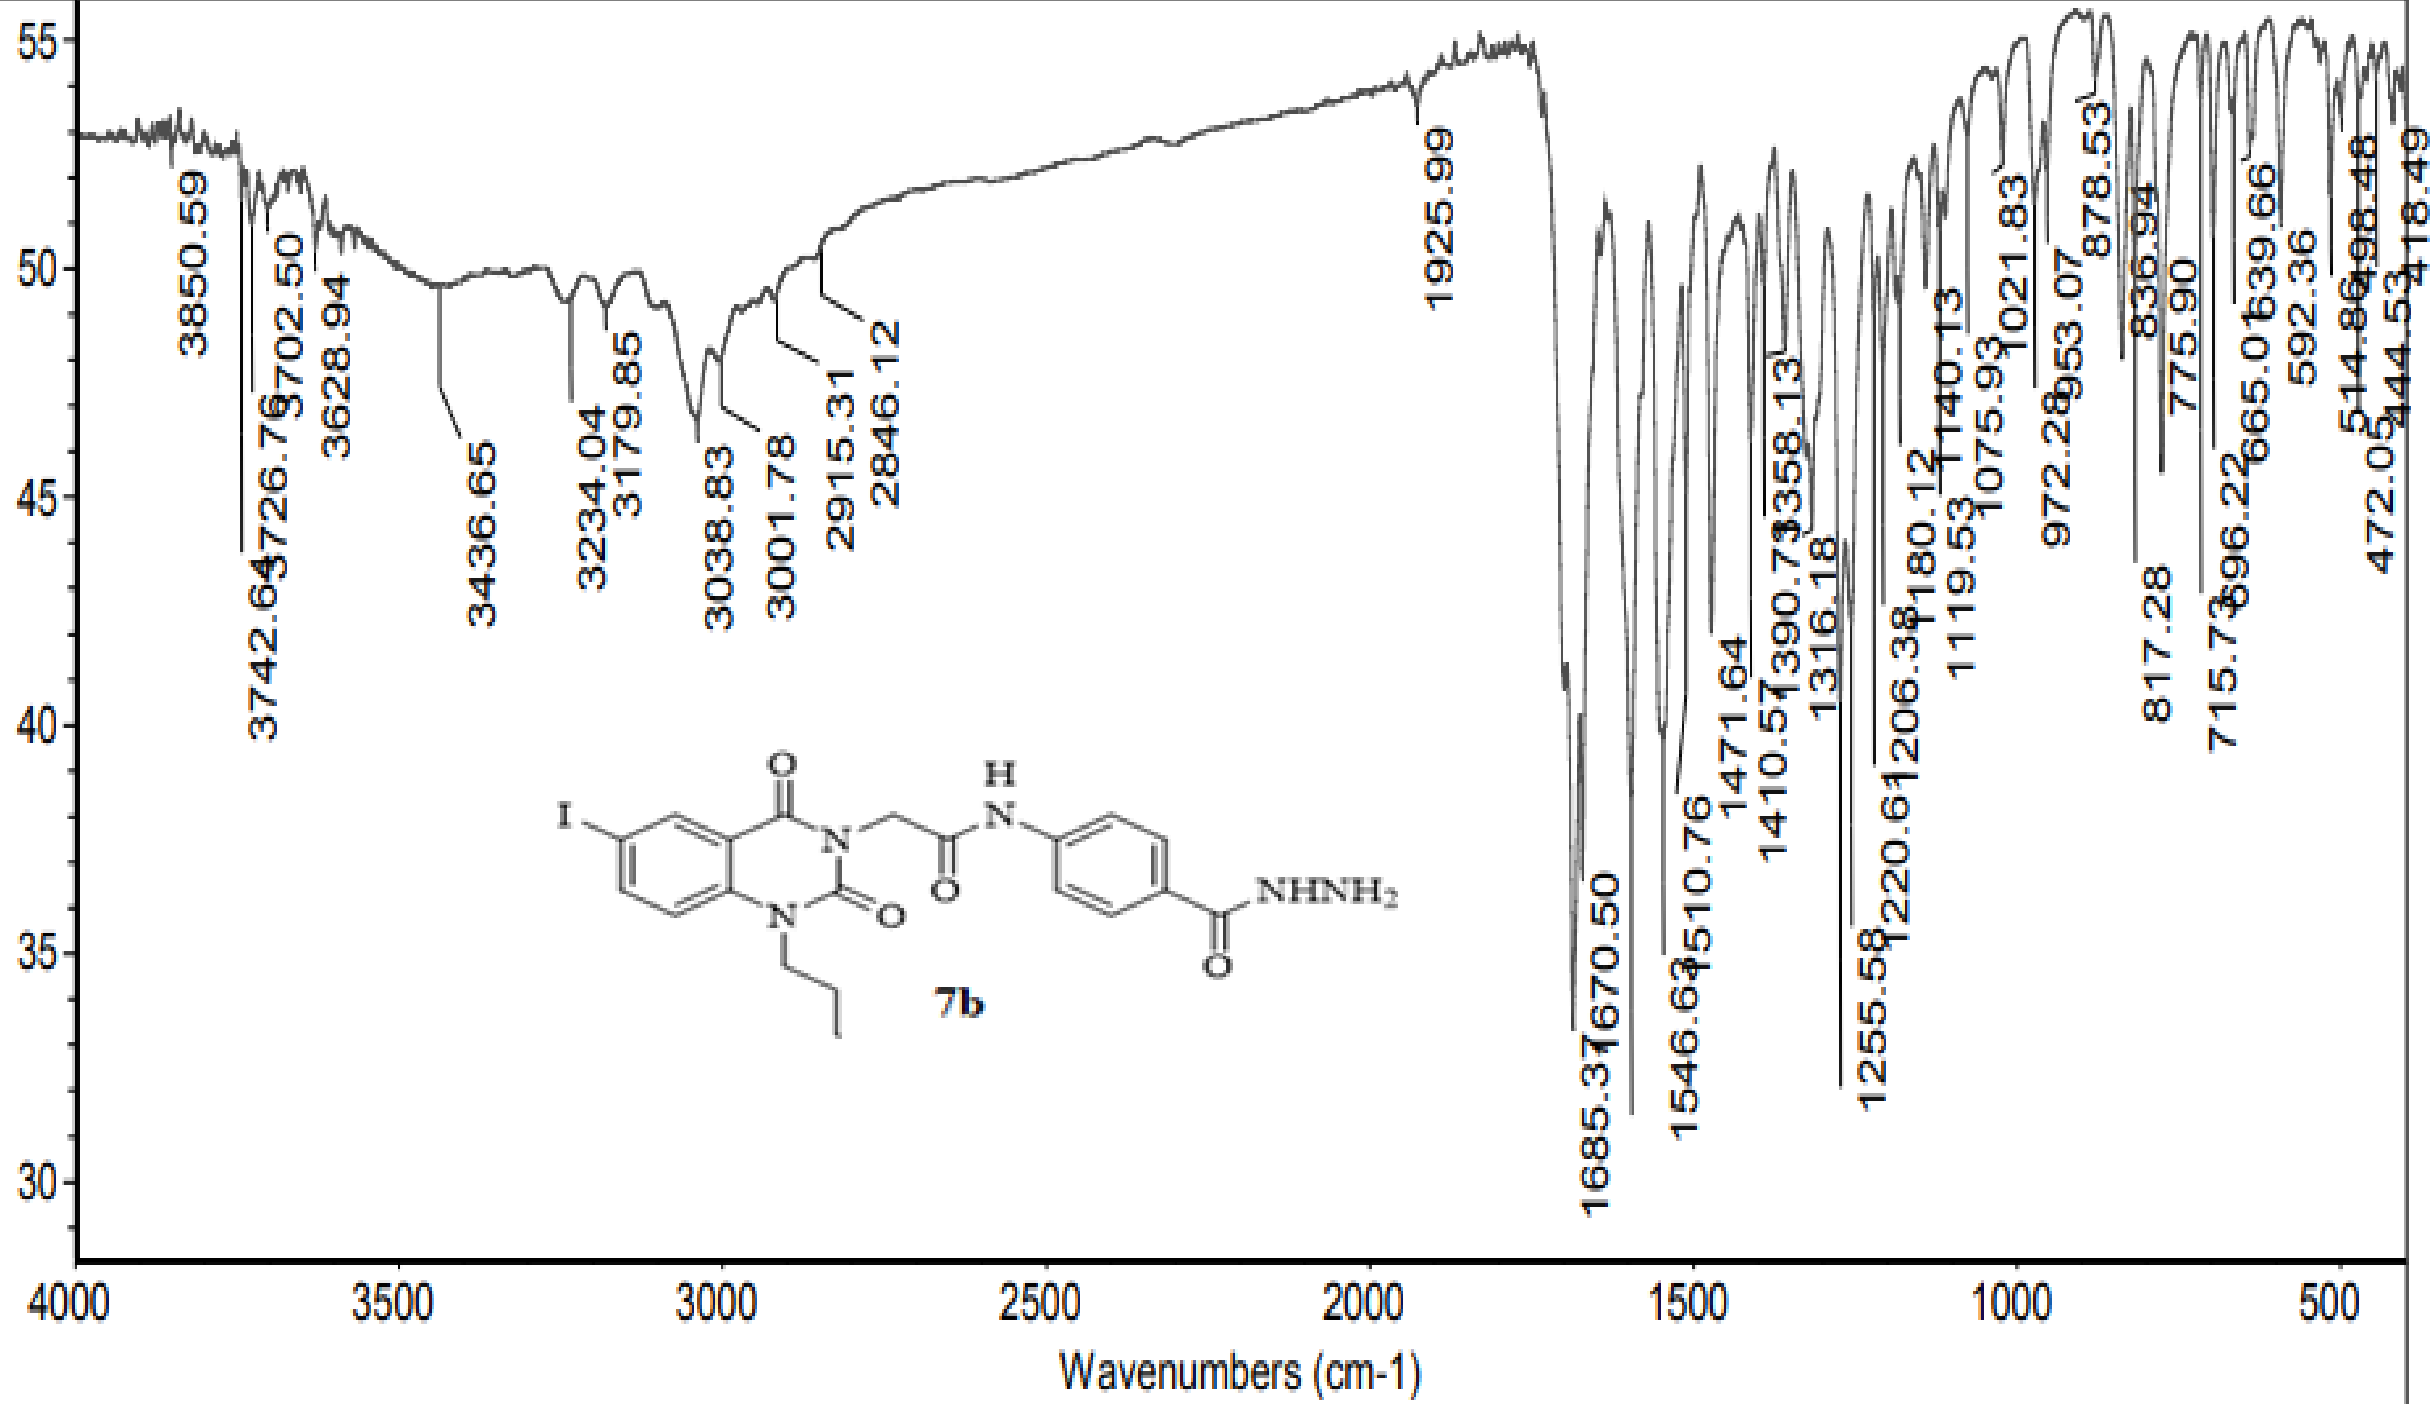

Current Data Parameters  
 NAME K-B  
 EXPNO 2  
 PROCNO 1

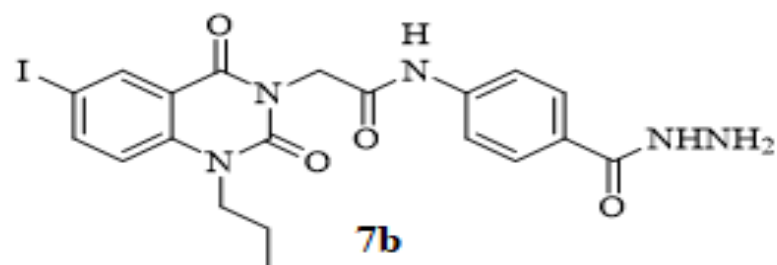

-----  
 AQ 1.3631488 sec  
 RG 205.37  
 DW 20.800 usec  
 DE 6.50 usec  
 TE 300.0 K  
 D1 2.00000000 sec  
 D11 0.03000000 sec  
 TD0 1

----- CHANNEL f1 -----  
 SFO1 100.6278588 MHz  
 NUC1 13C  
 P1 10.00 usec  
 PLW1 47.00000000 W

----- CHANNEL f2 -----  
 SFO2 400.1516006 MHz  
 NUC2 1H  
 CPDPRG[2] waltz16  
 PCPD2 90.00 usec  
 PLW2 18.00000000 W  
 PLW12 0.34722000 W  
 PLW13 0.28125000 W

F2 - Processing parameters  
 SI 32768  
 SF 100.6177975 MHz  
 WDW EM  
 SSB 0  
 LB 1.00 Hz  
 GB 0  
 PC 1.40

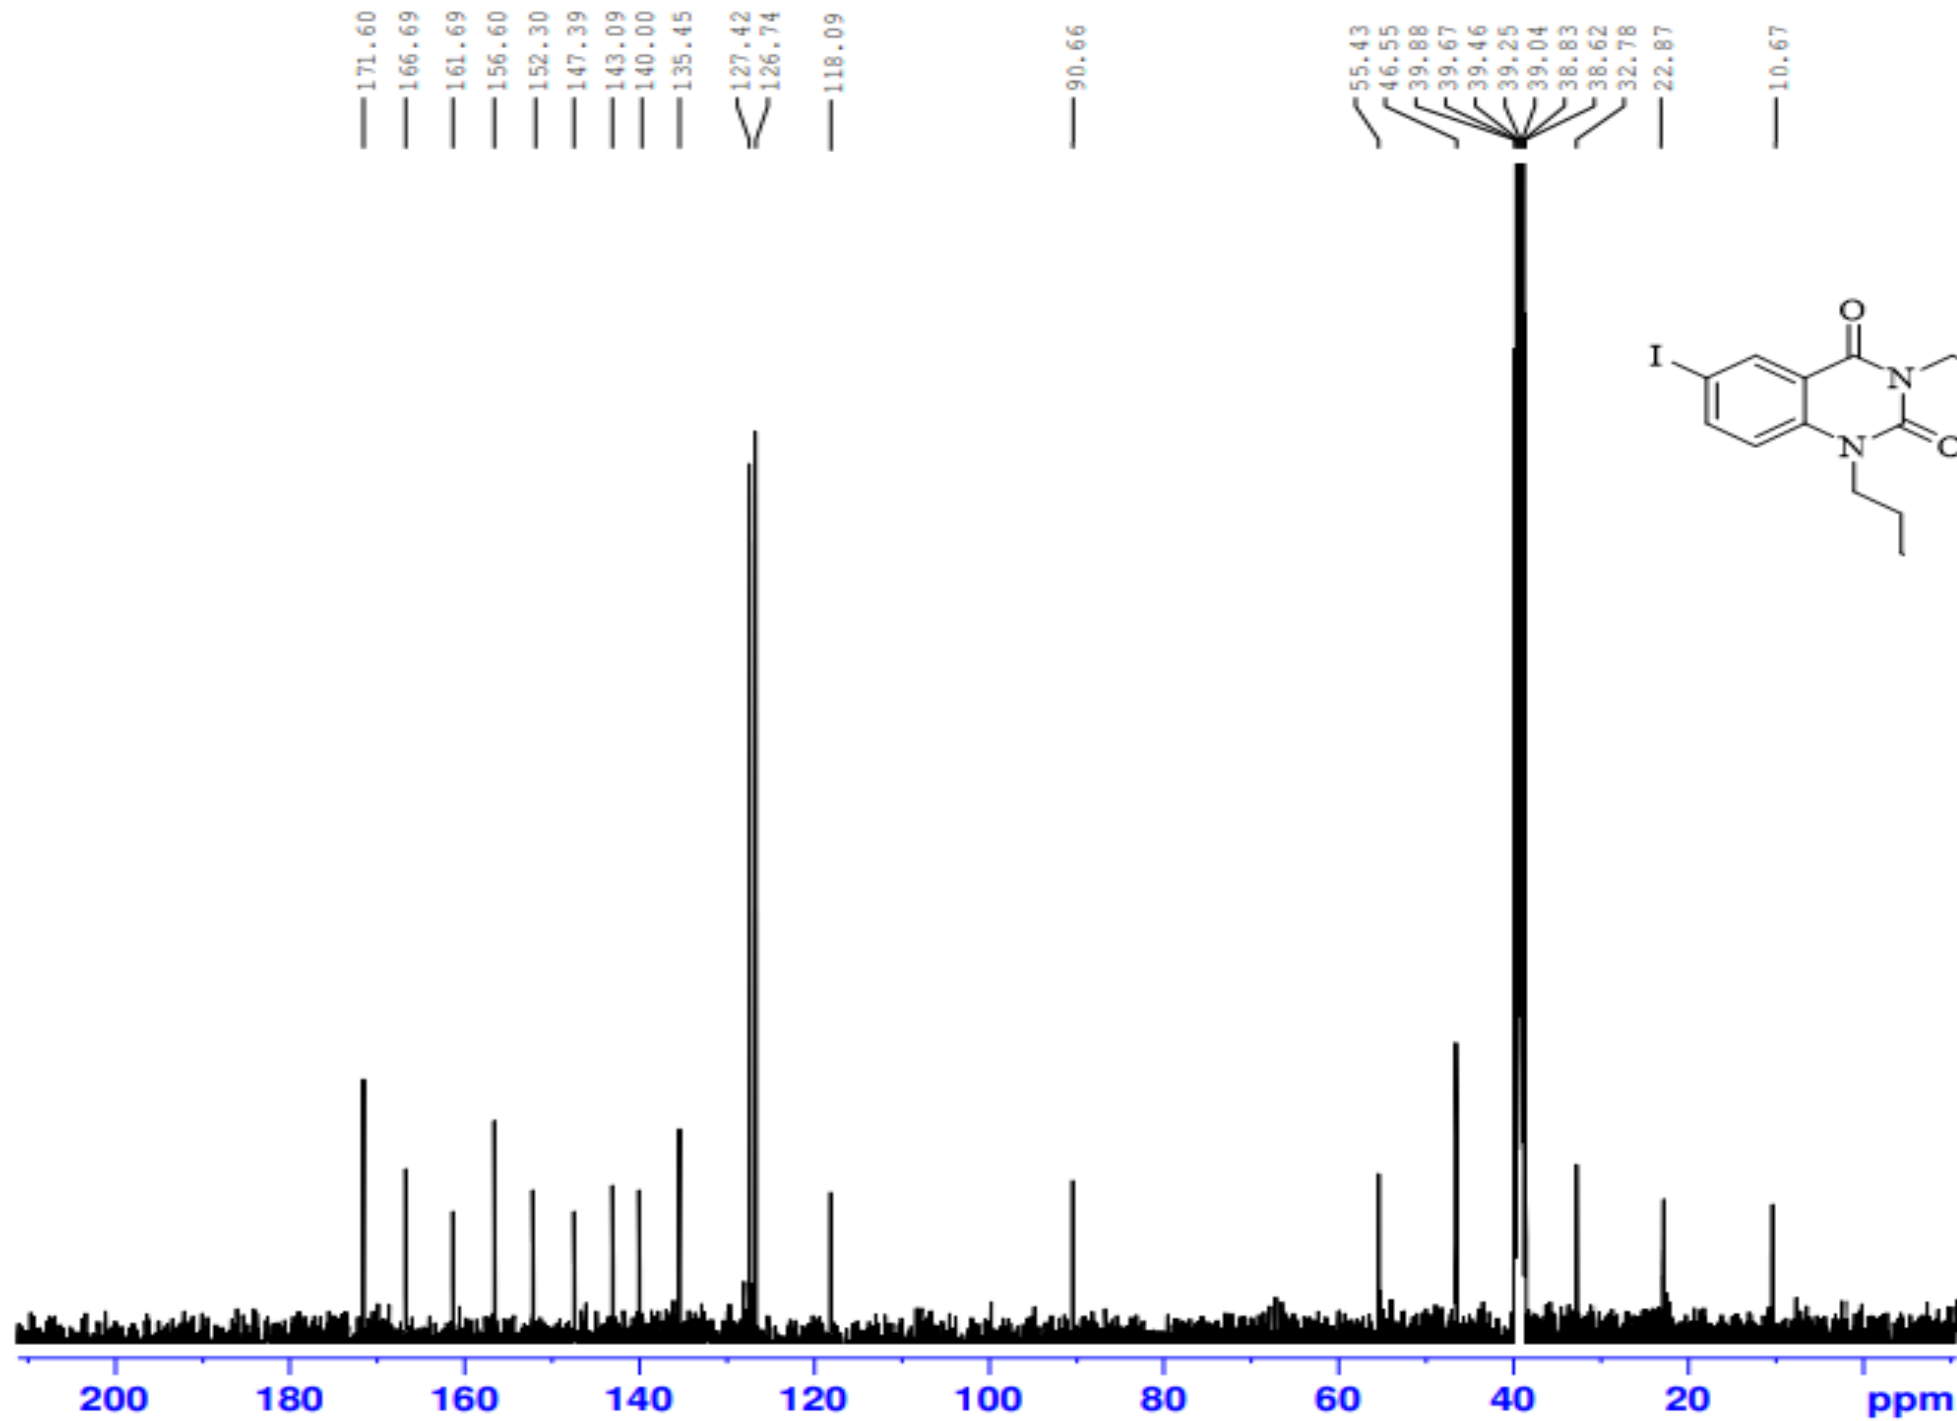



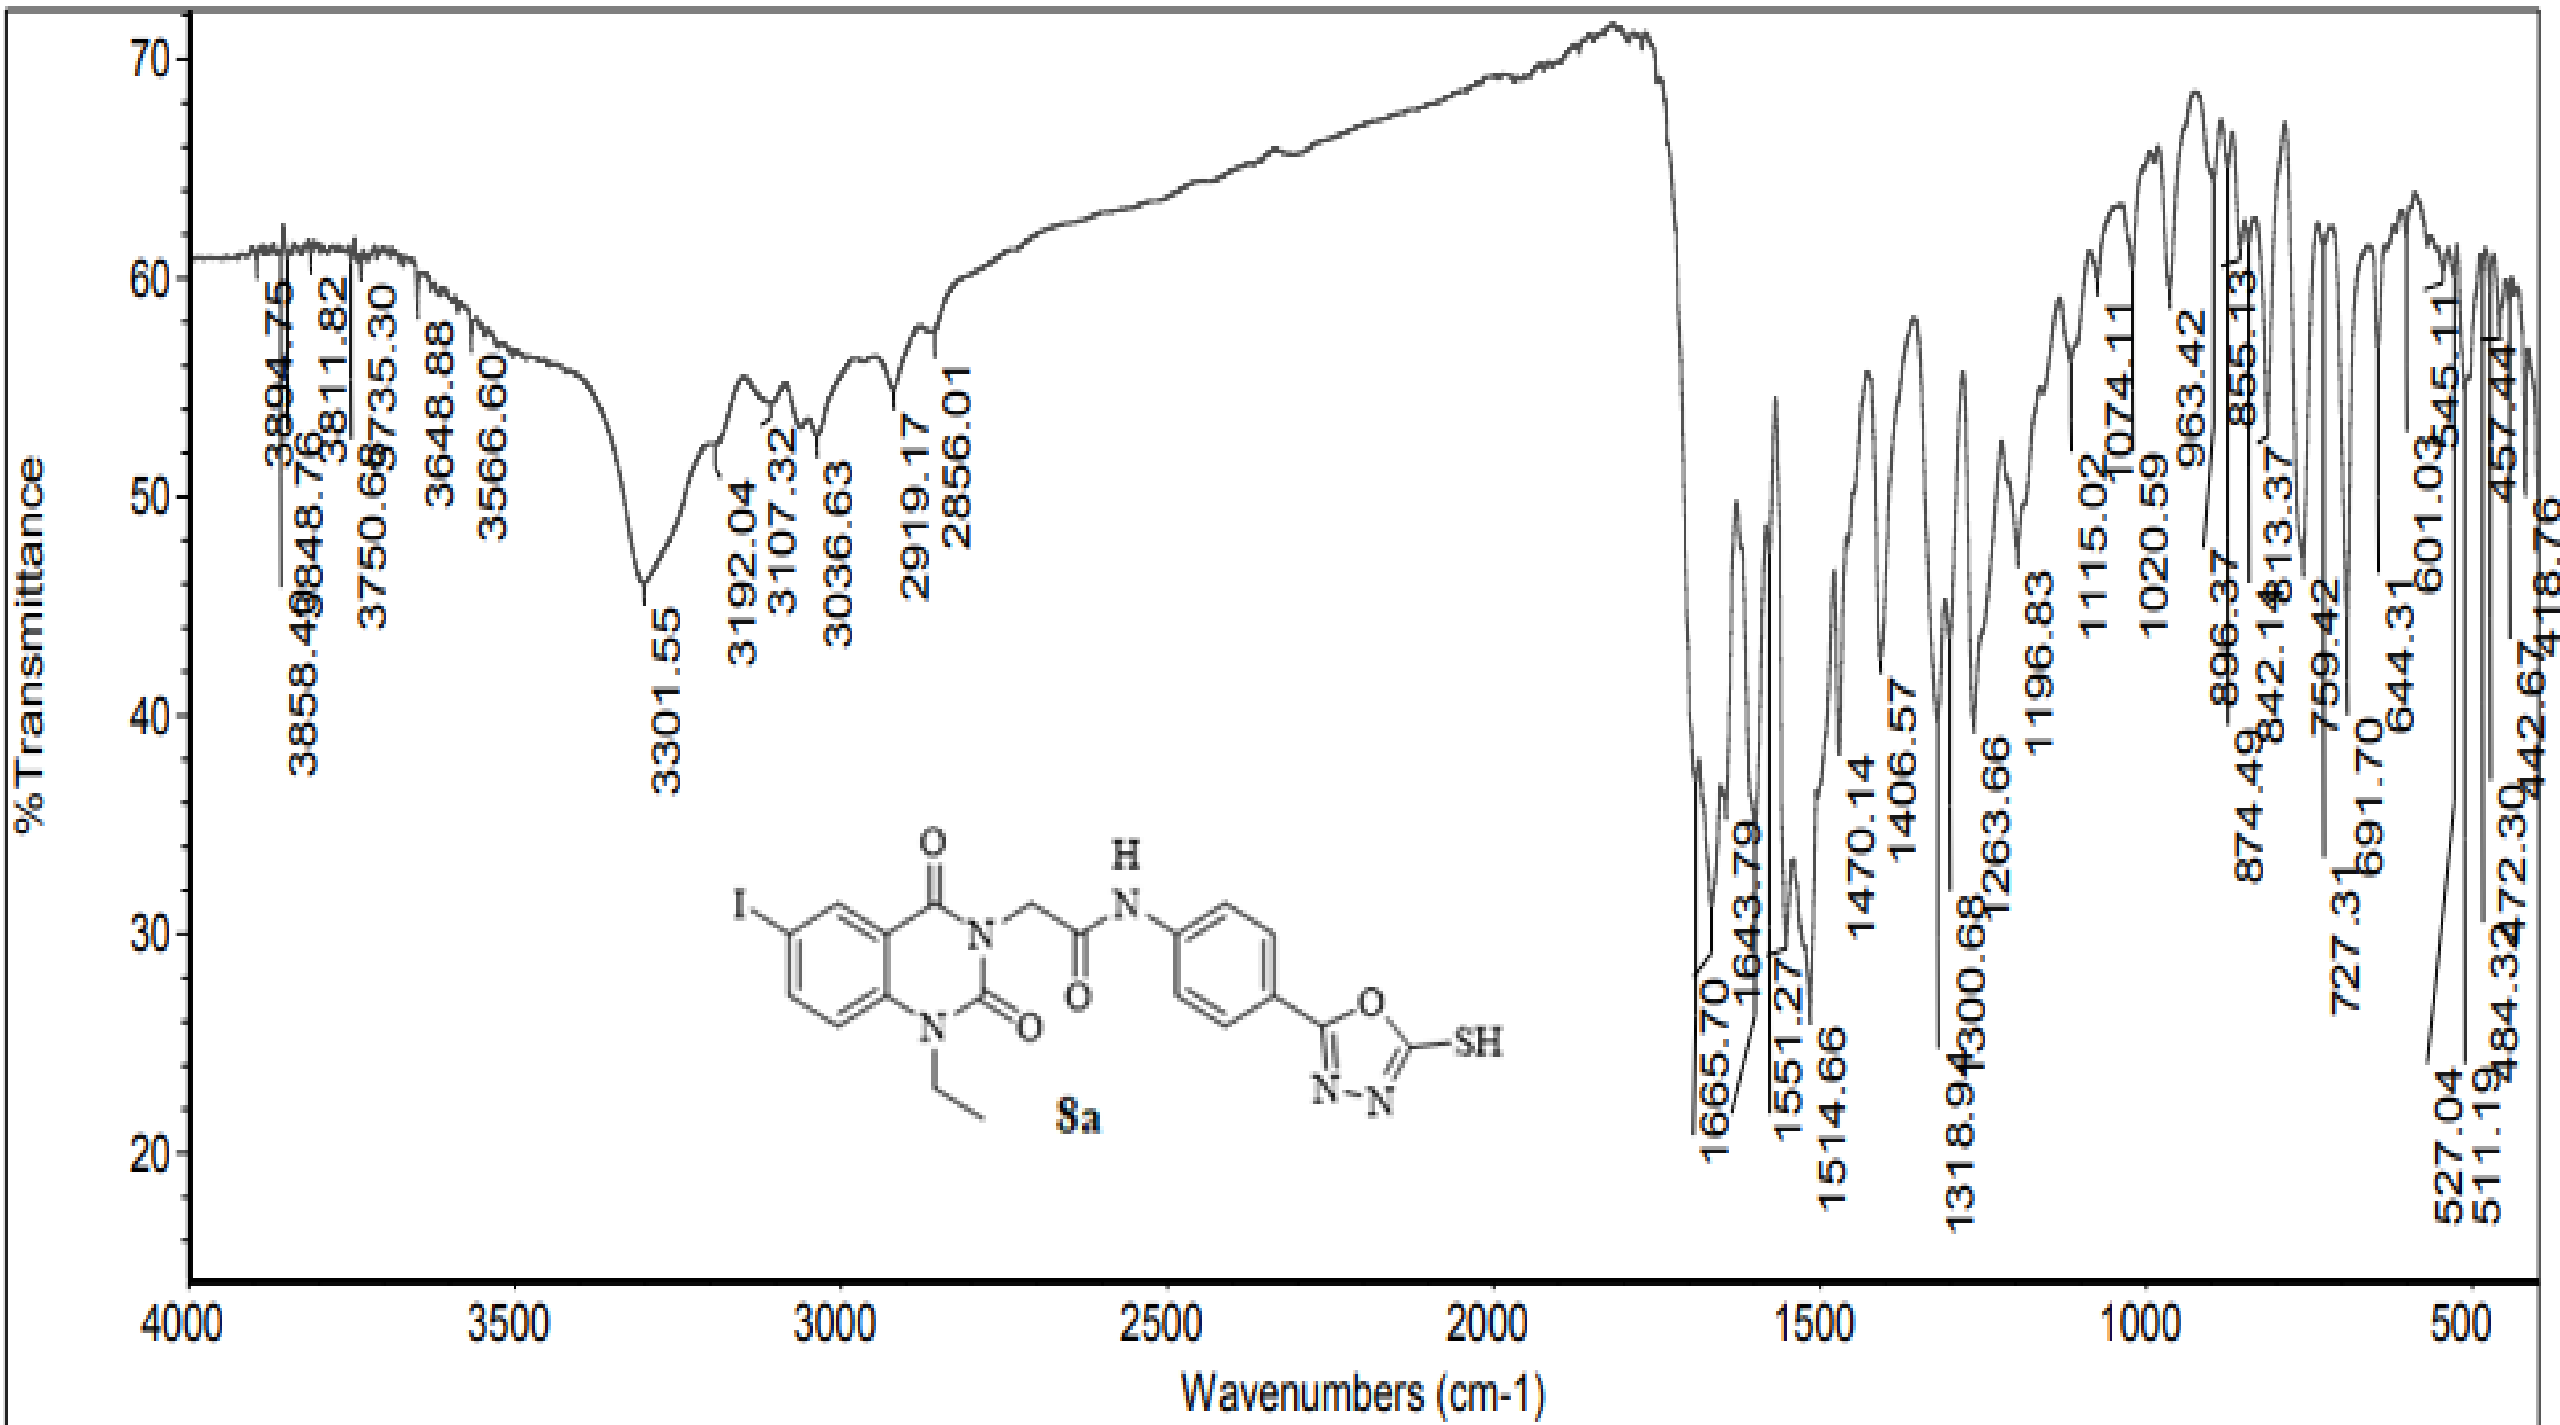

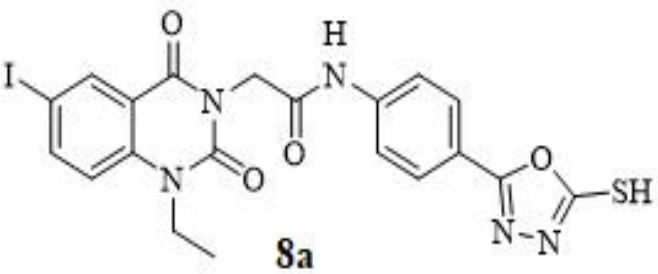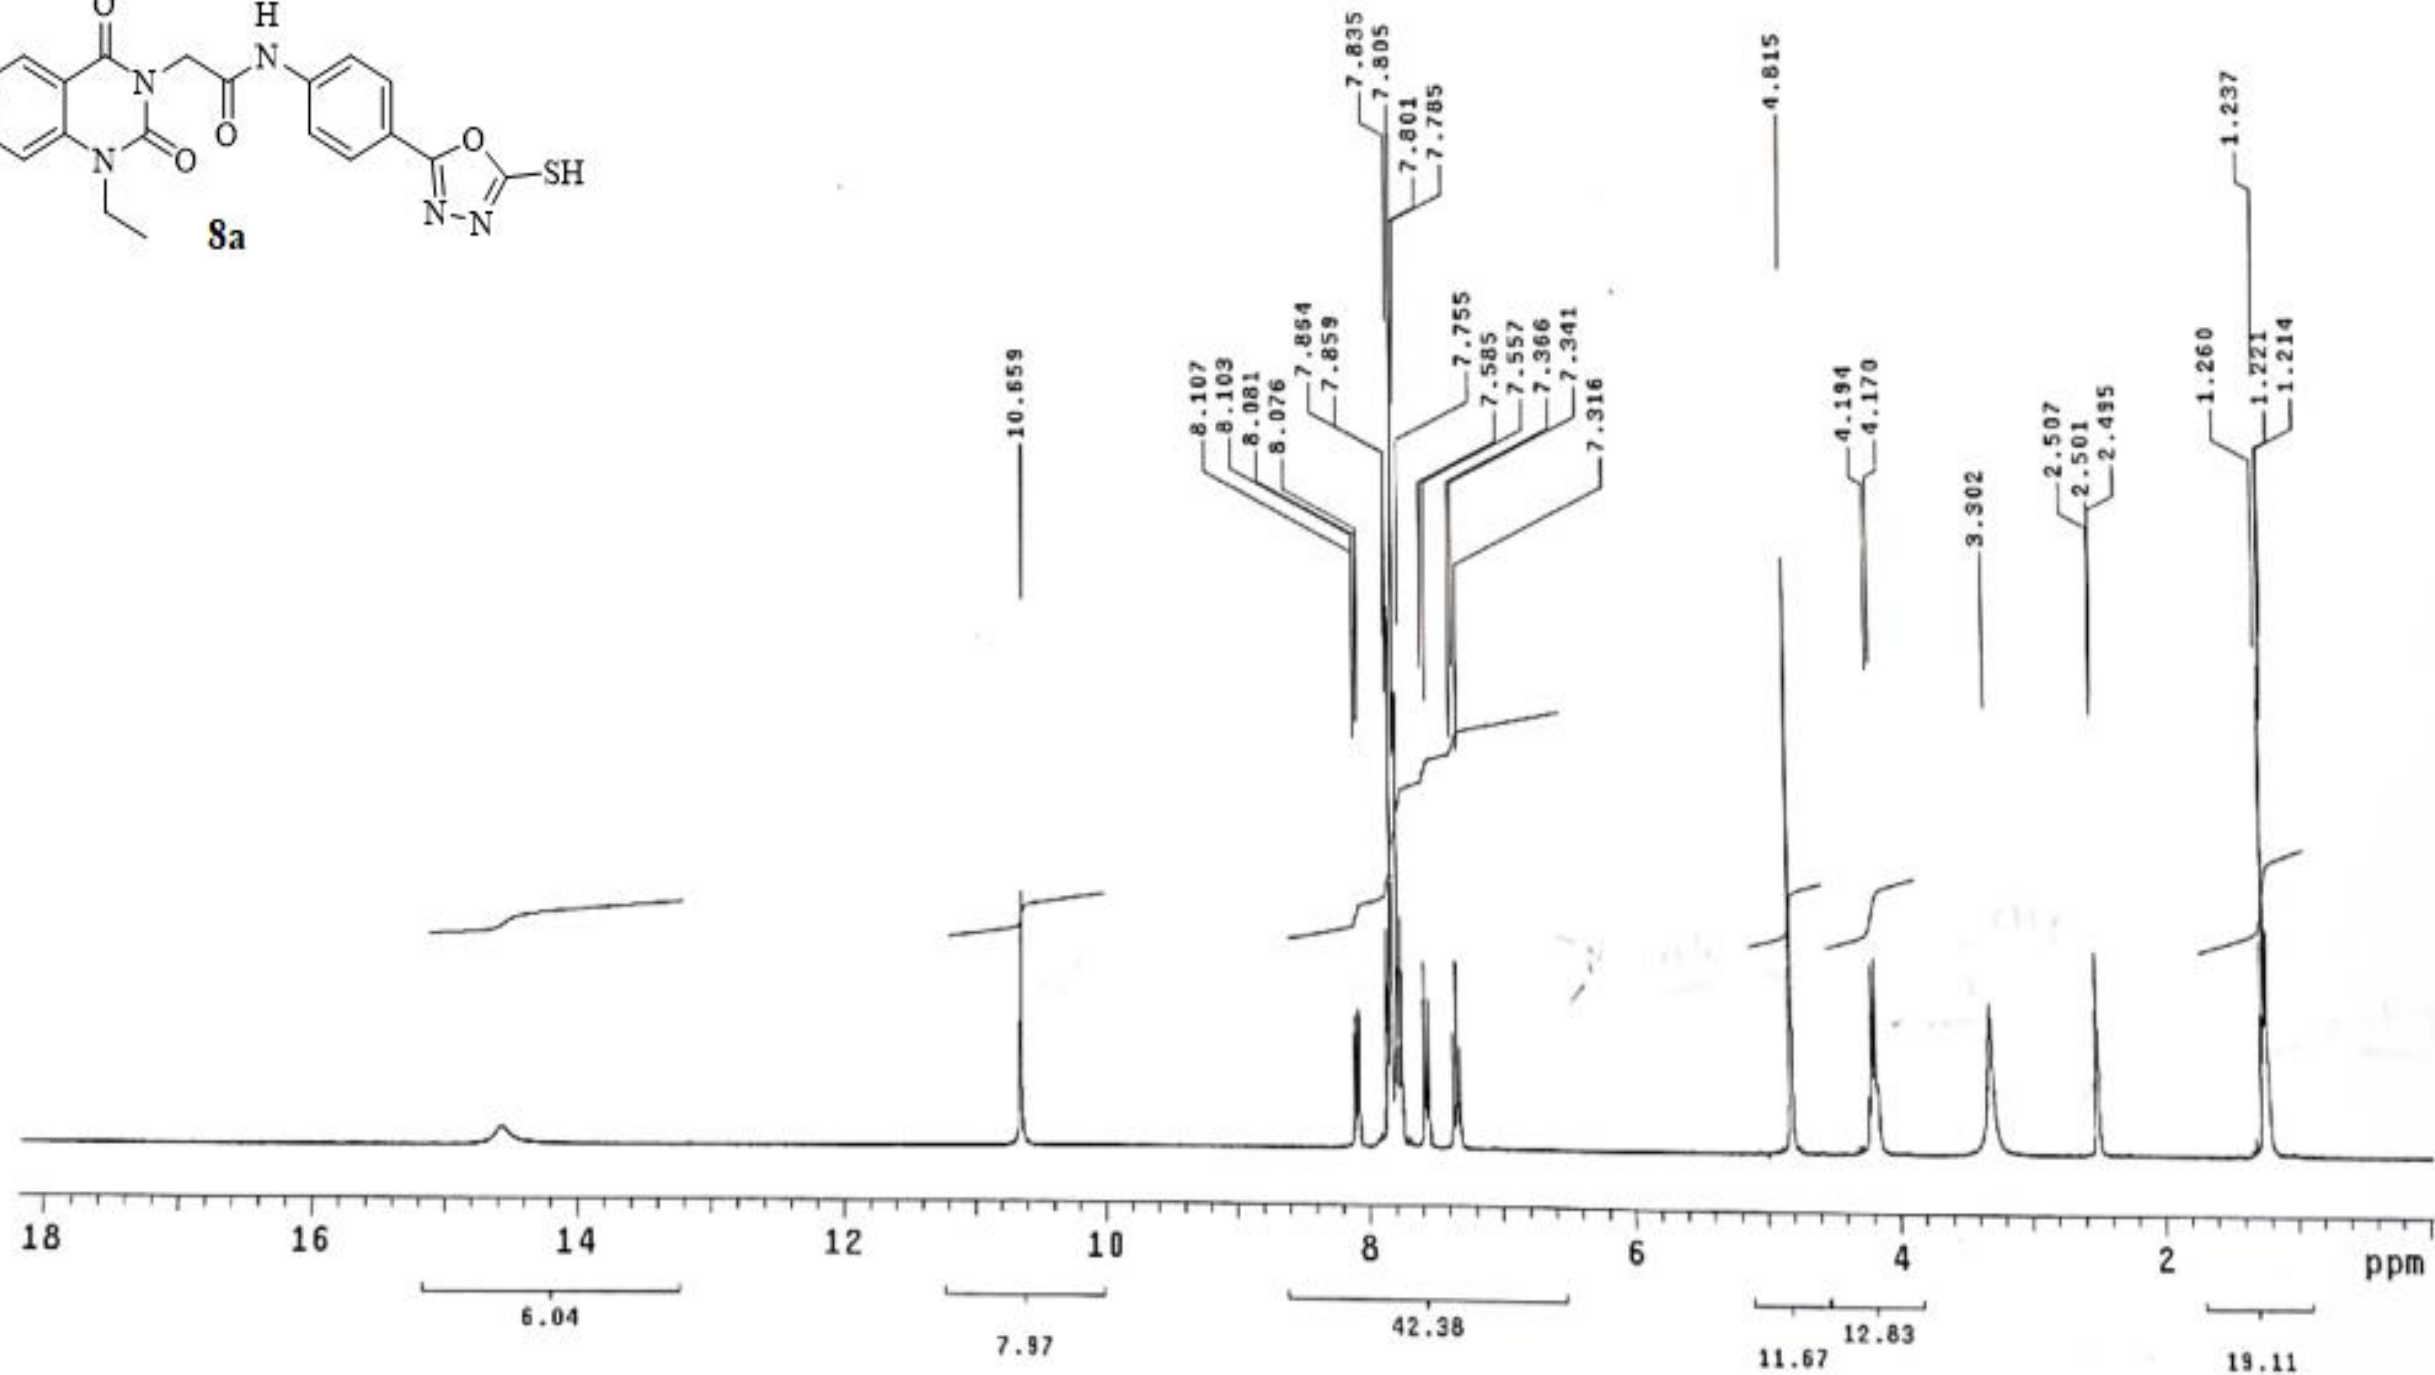

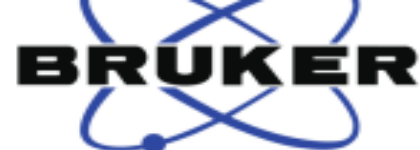

Current Data Parameters  
NAME K-K  
EXPNO 2  
PROCNO 1

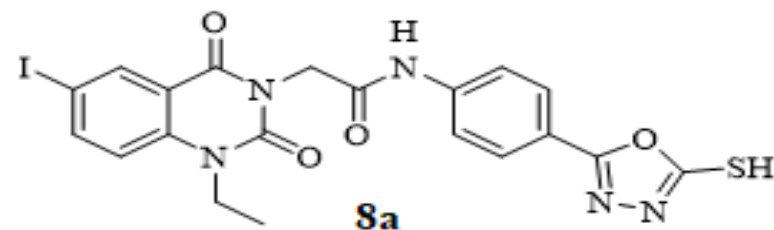

SWH 24038.461 MHz  
FIDRES 0.366798 Hz  
AQ 1.3631488 sec  
RG 205.37  
DW 20.800 usec  
DE 6.50 usec  
TE 300.0 K  
D1 2.0000000 sec  
D11 0.0300000 sec  
TD0 1

----- CHANNEL f1 -----  
SFO1 100.6278588 MHz  
NUC1 13C  
P1 10.00 usec  
PLW1 47.0000000 W

----- CHANNEL f2 -----  
SFO2 400.1516006 MHz  
NUC2 1H  
CPDPRG[2] waltz16  
PCPD2 90.00 usec  
PLW2 18.0000000 W  
PLW12 0.3472200 W  
PLW13 0.2812500 W

F2 - Processing parameters  
SI 32768  
SF 100.6177975 MHz  
WDW EM  
SSB 0  
LB 1.00 Hz  
GB 0  
PC 1.40

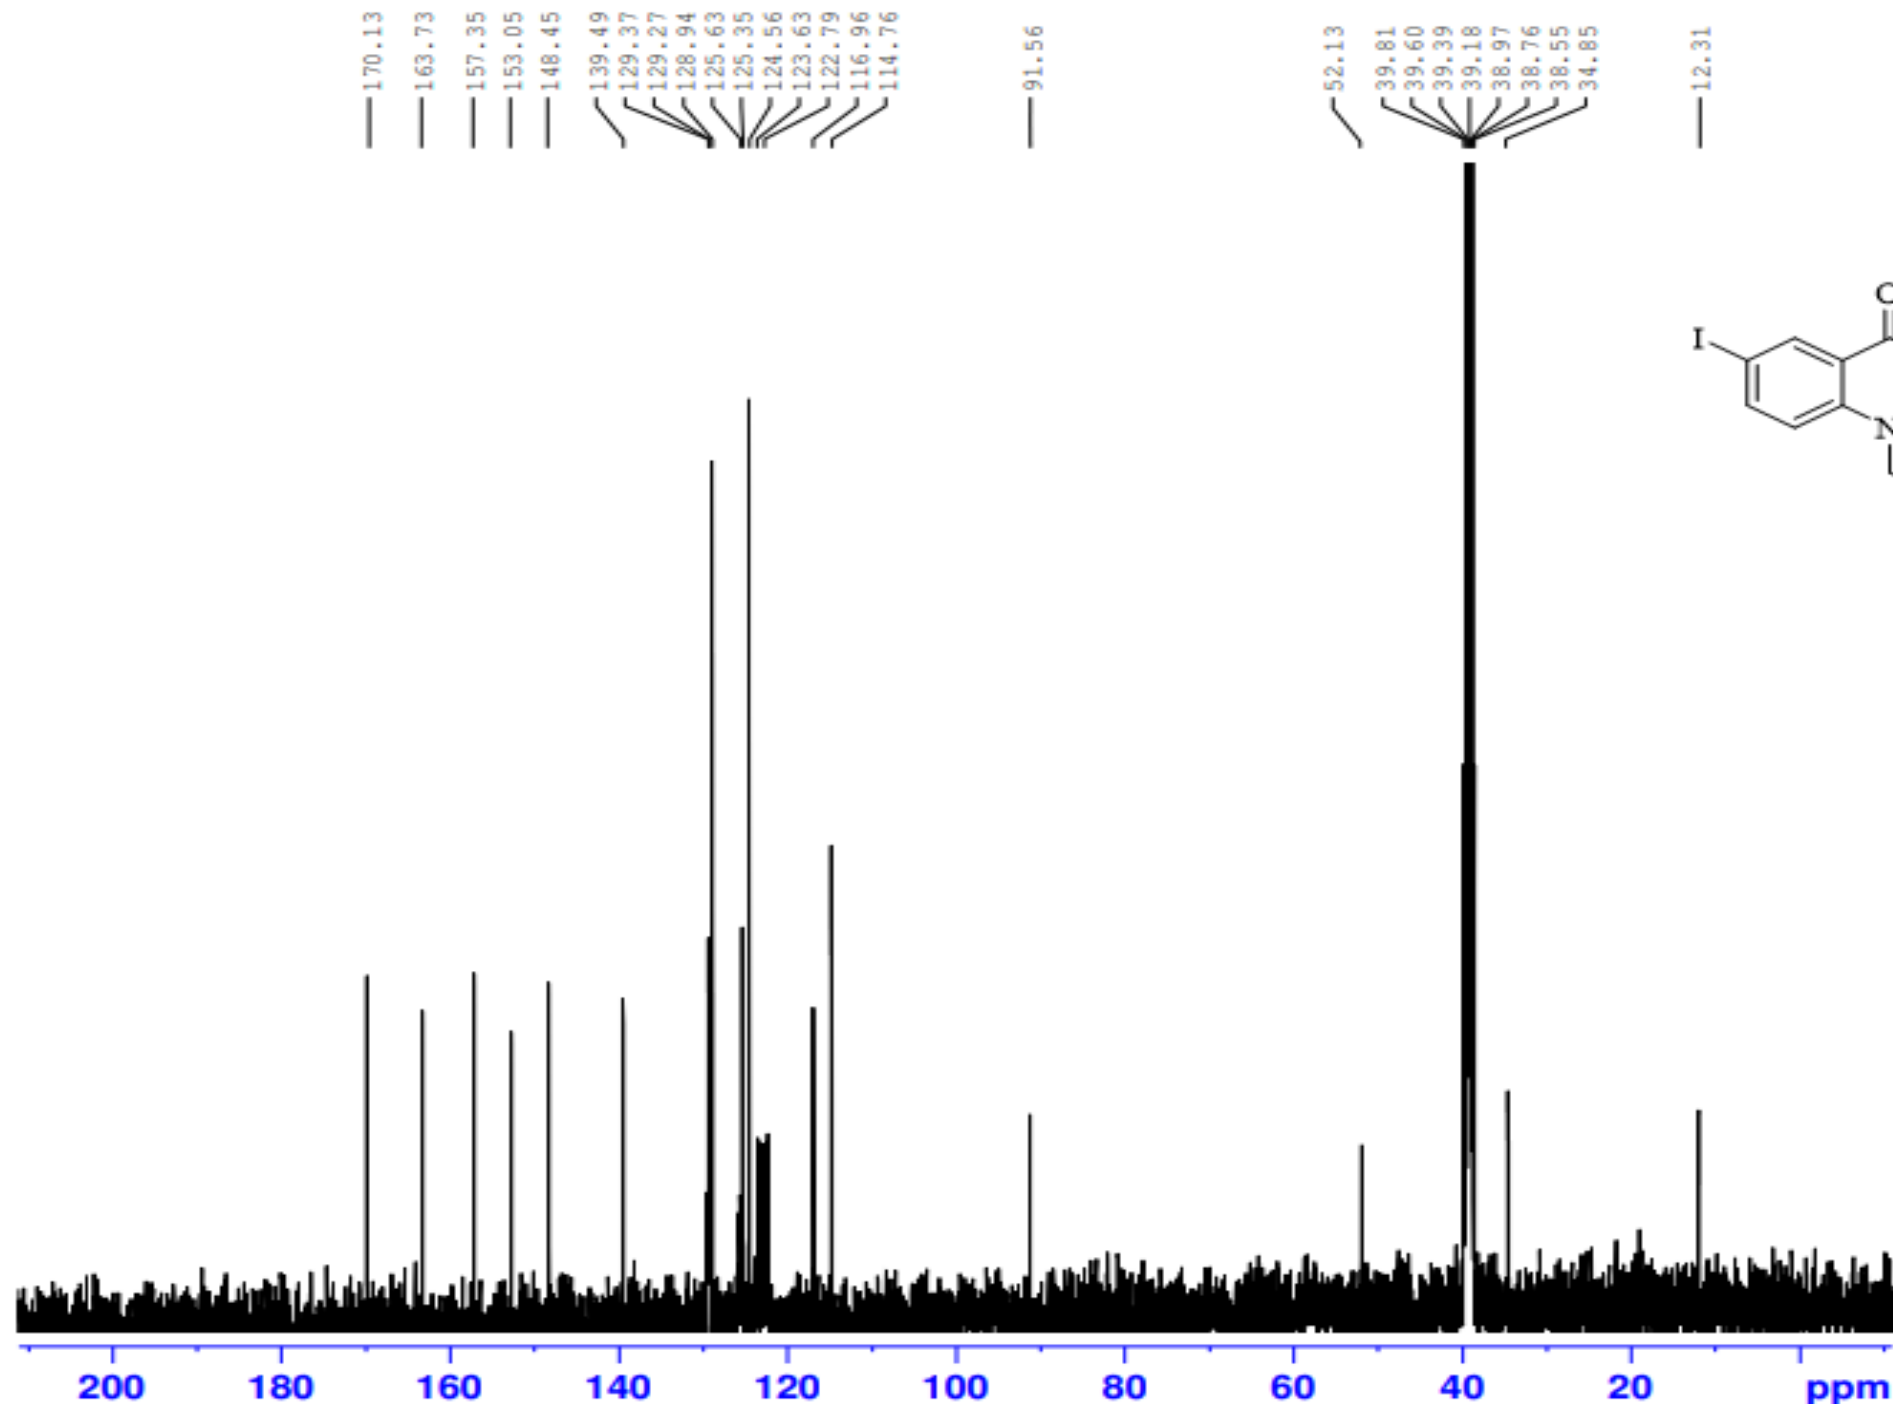

Relax. delay 1.000 sec  
Pulse 74.1 degrees  
Acq. time 4.904 sec  
Width 8000.0 Hz  
10 repetitions  
OBSERVE H1, 300.9687875 MHz  
DATA PROCESSING  
FT size 65536  
Total time 19 min, 19 sec

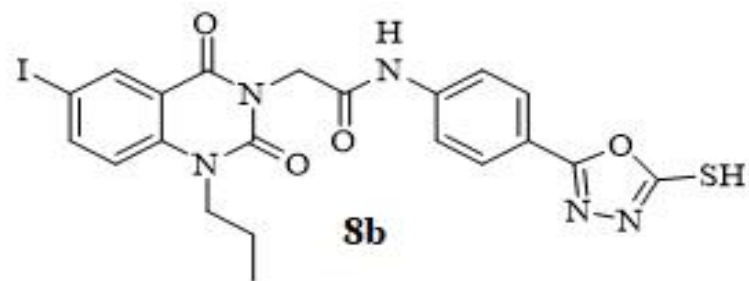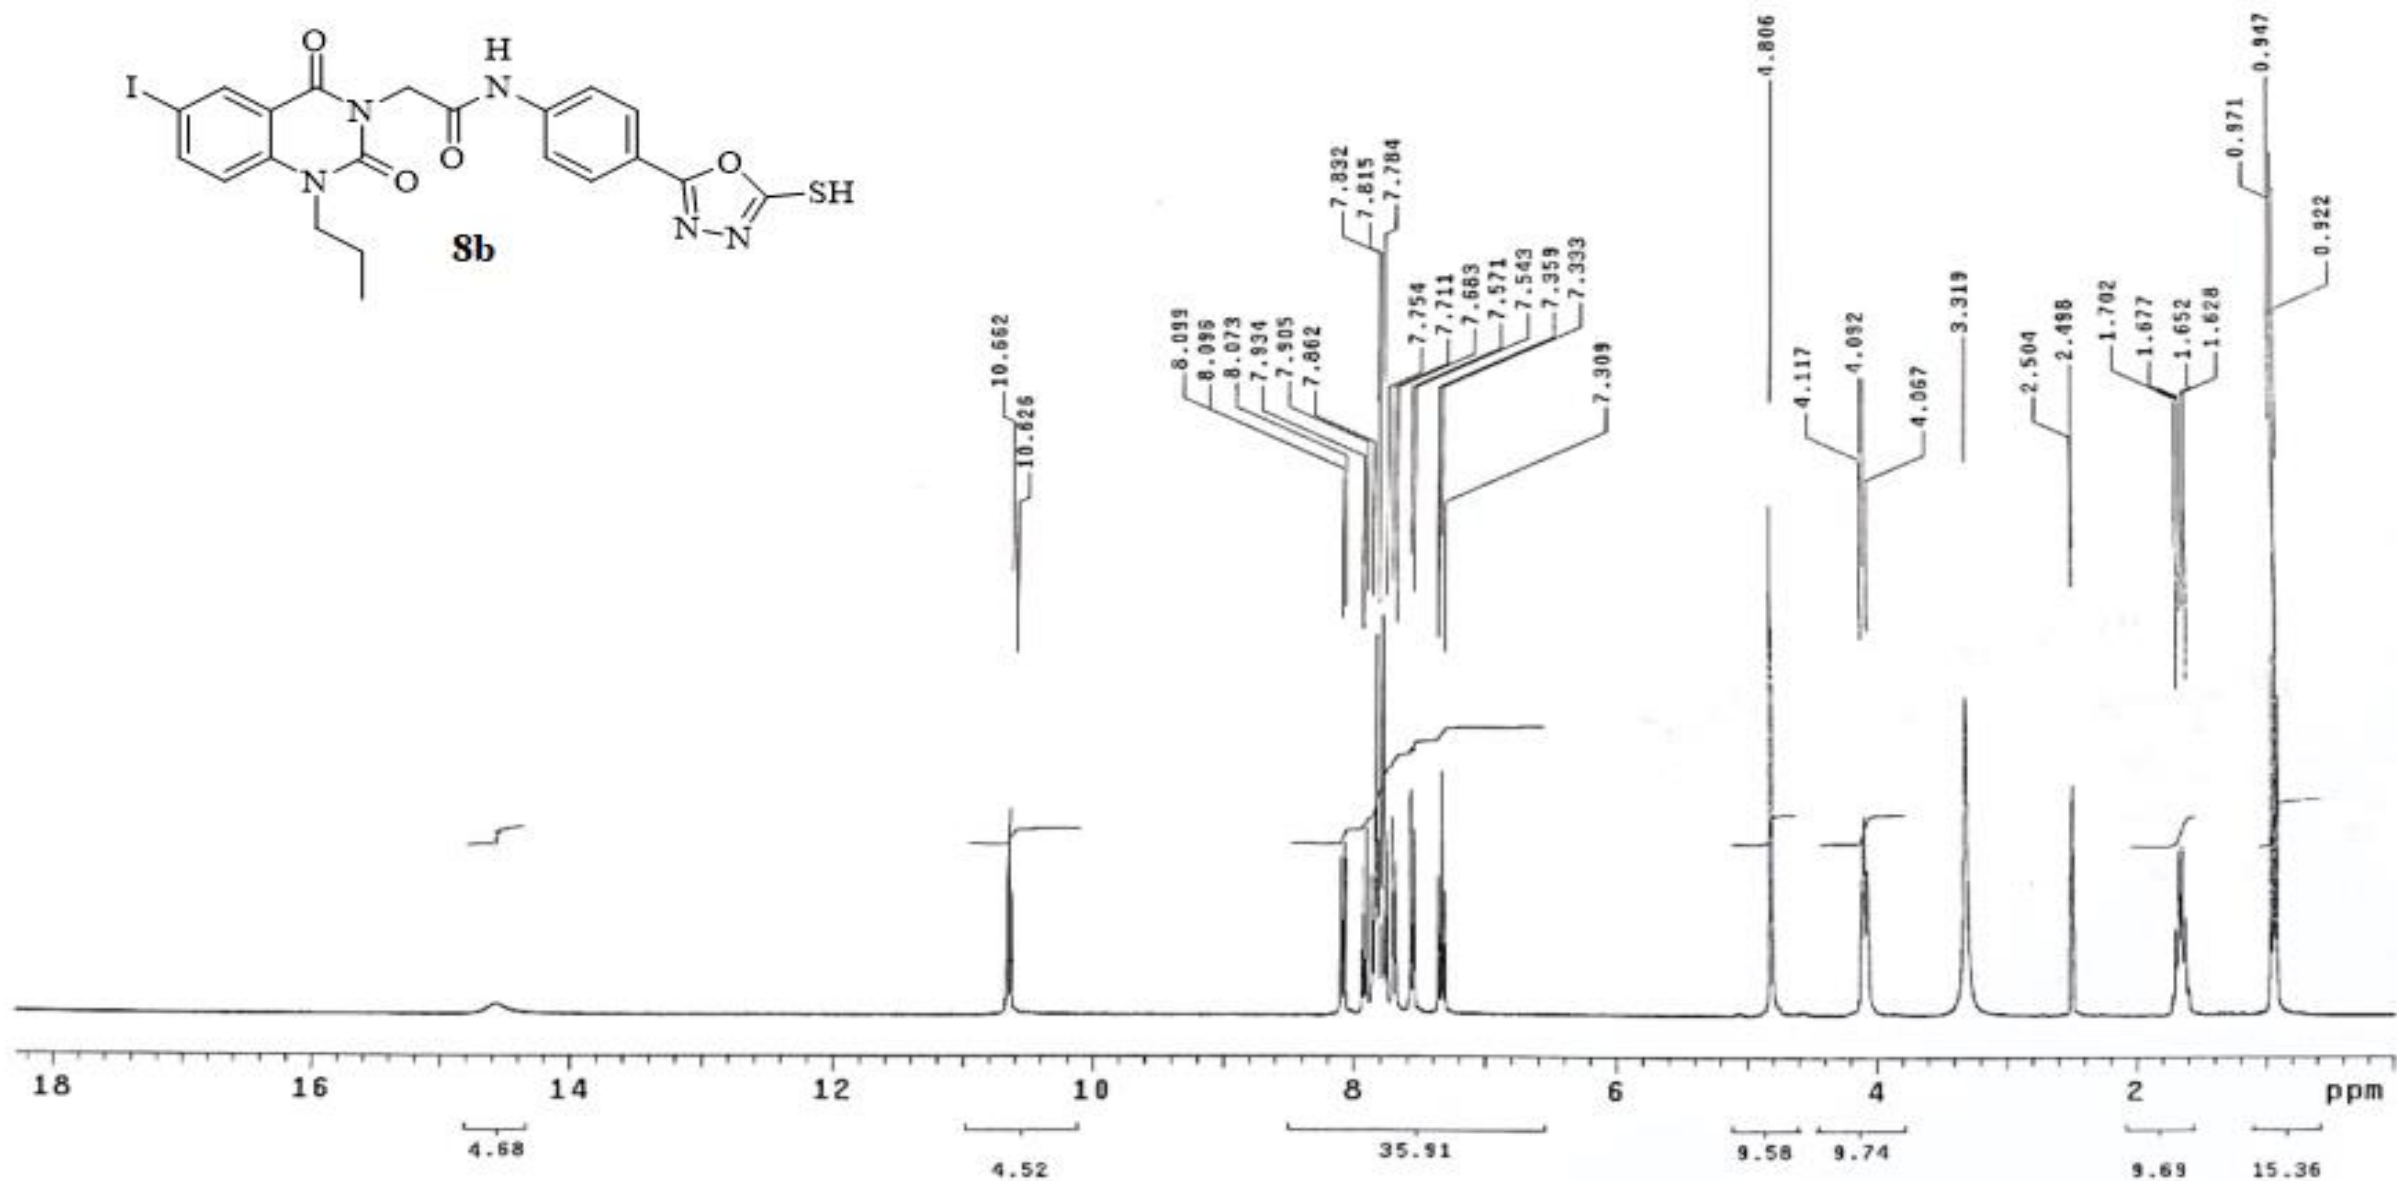

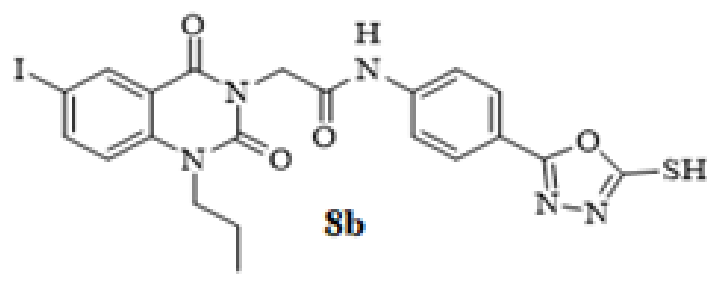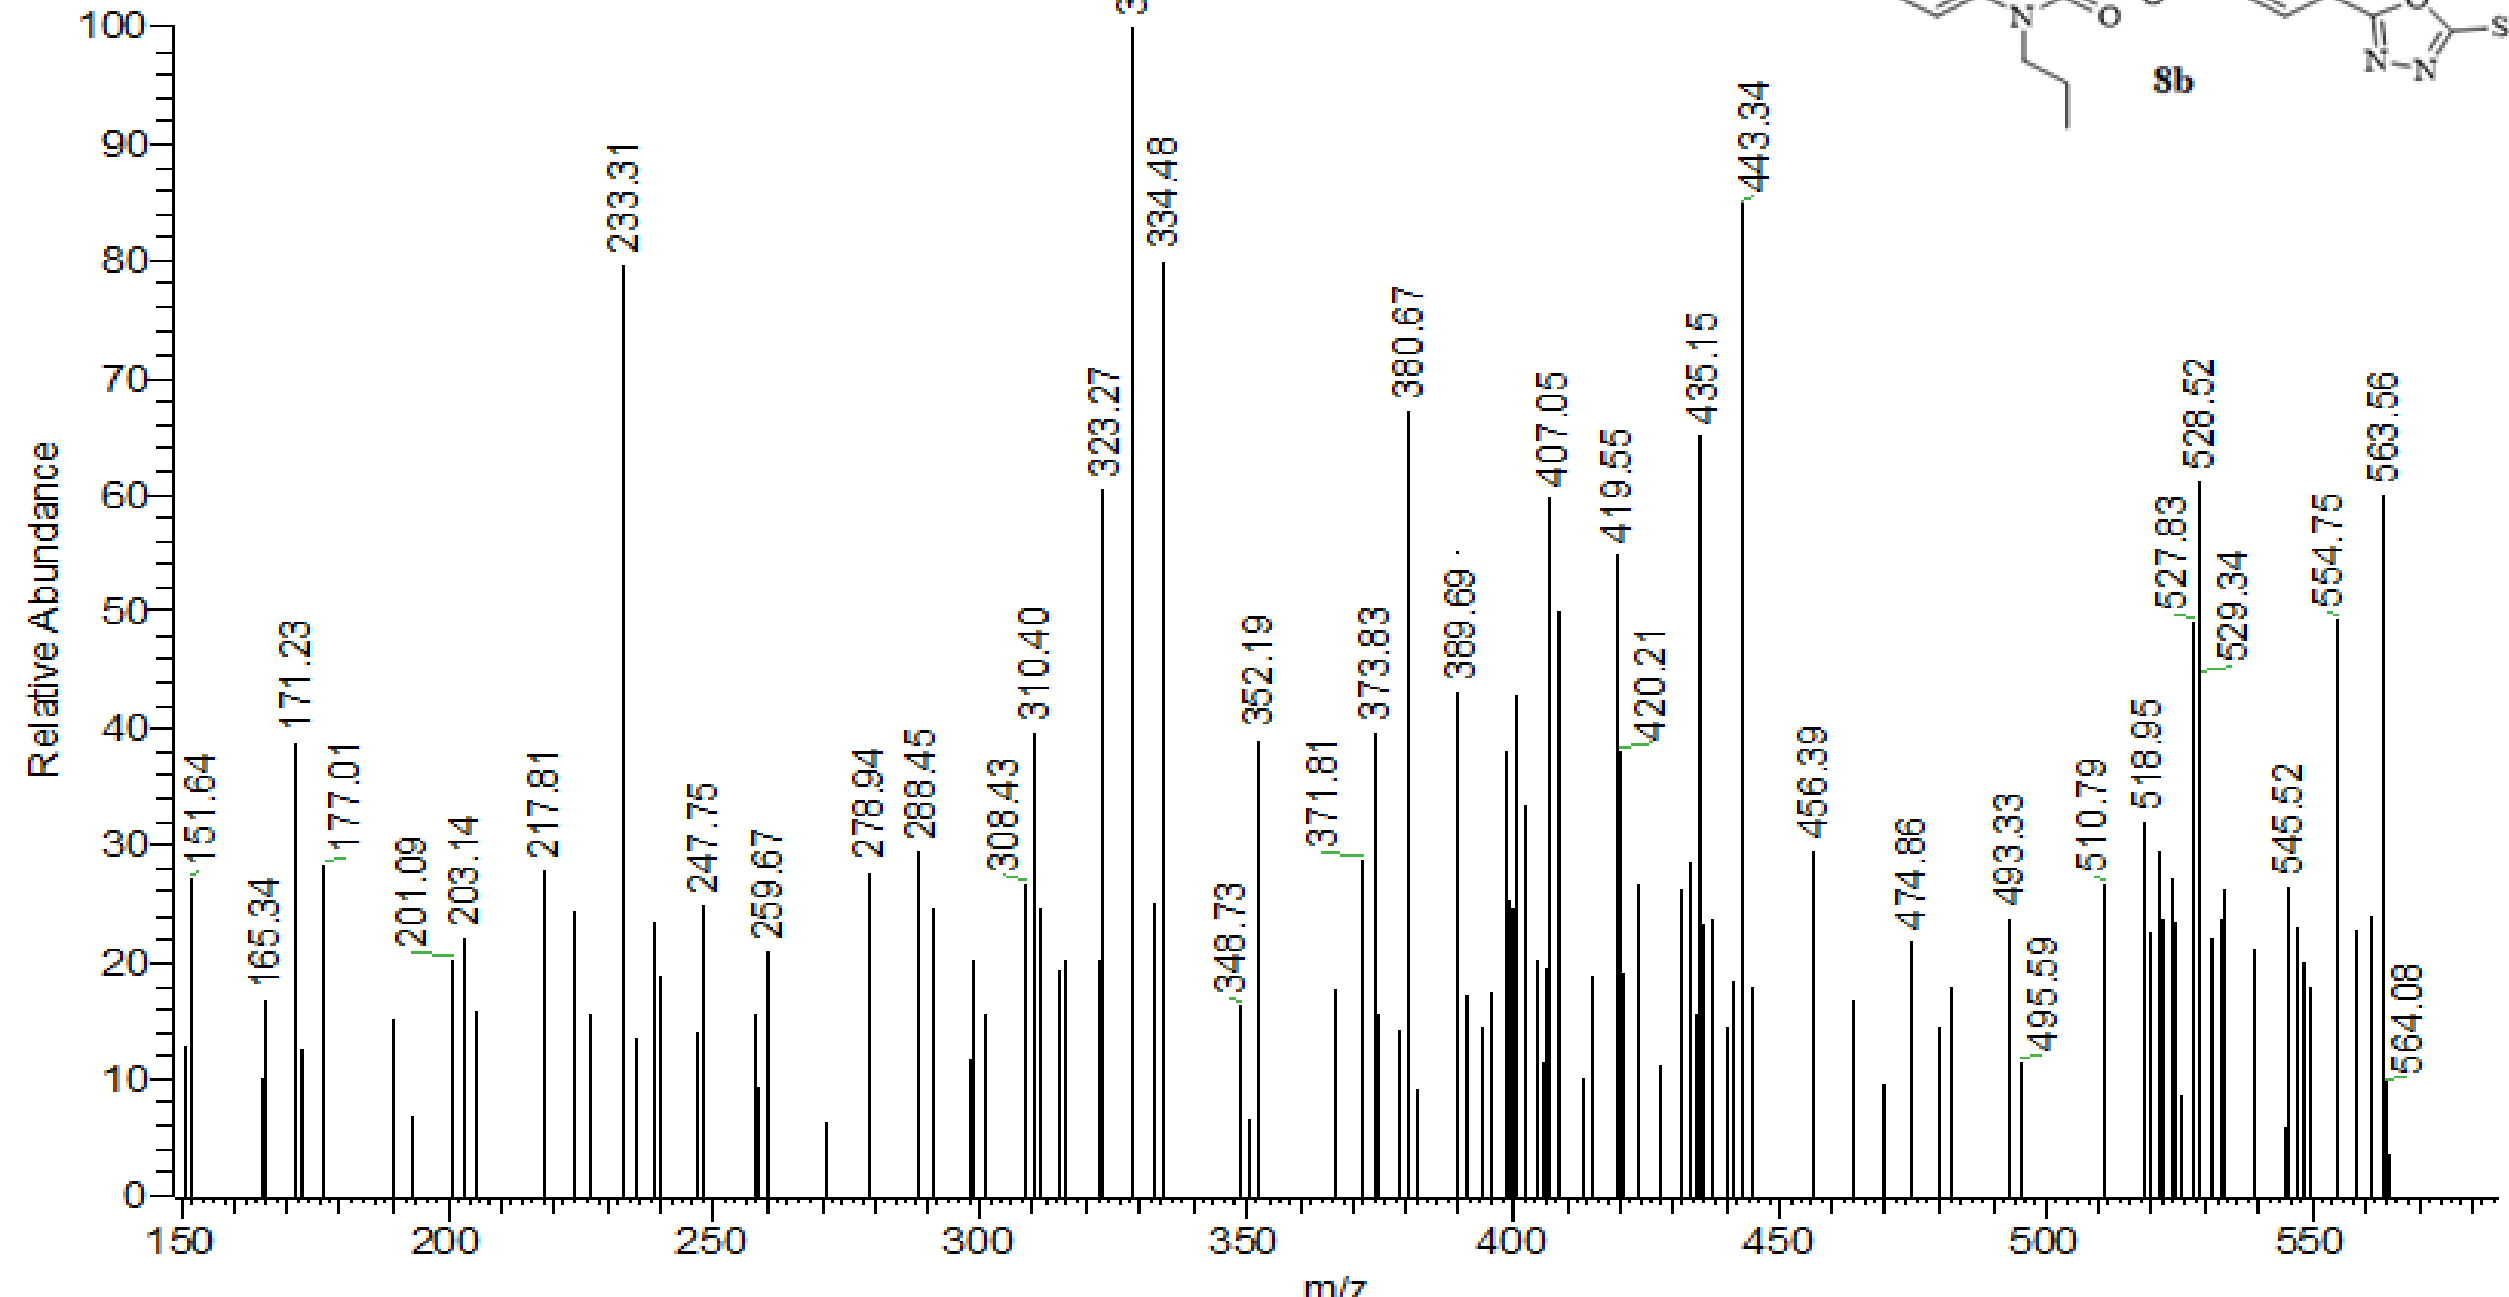

Relax. delay 1.000 sec  
Pulse 74.1 degrees  
Acq. time 4.004 sec  
Width 8000.0 Hz  
14 repetitions  
OBSERVE H1, 300.0687875 MHz  
DATA PROCESSING  
FT size 65536  
Total time 13 min. 13 sec

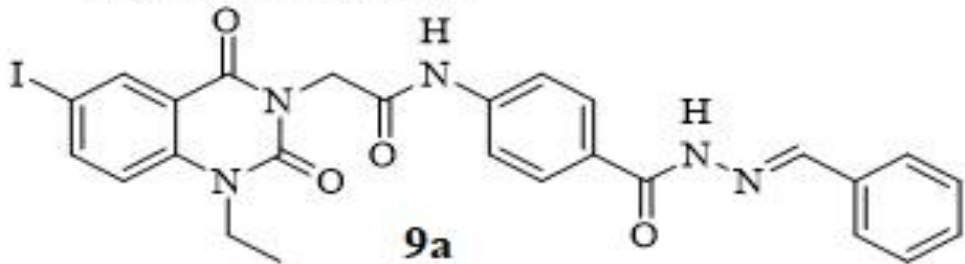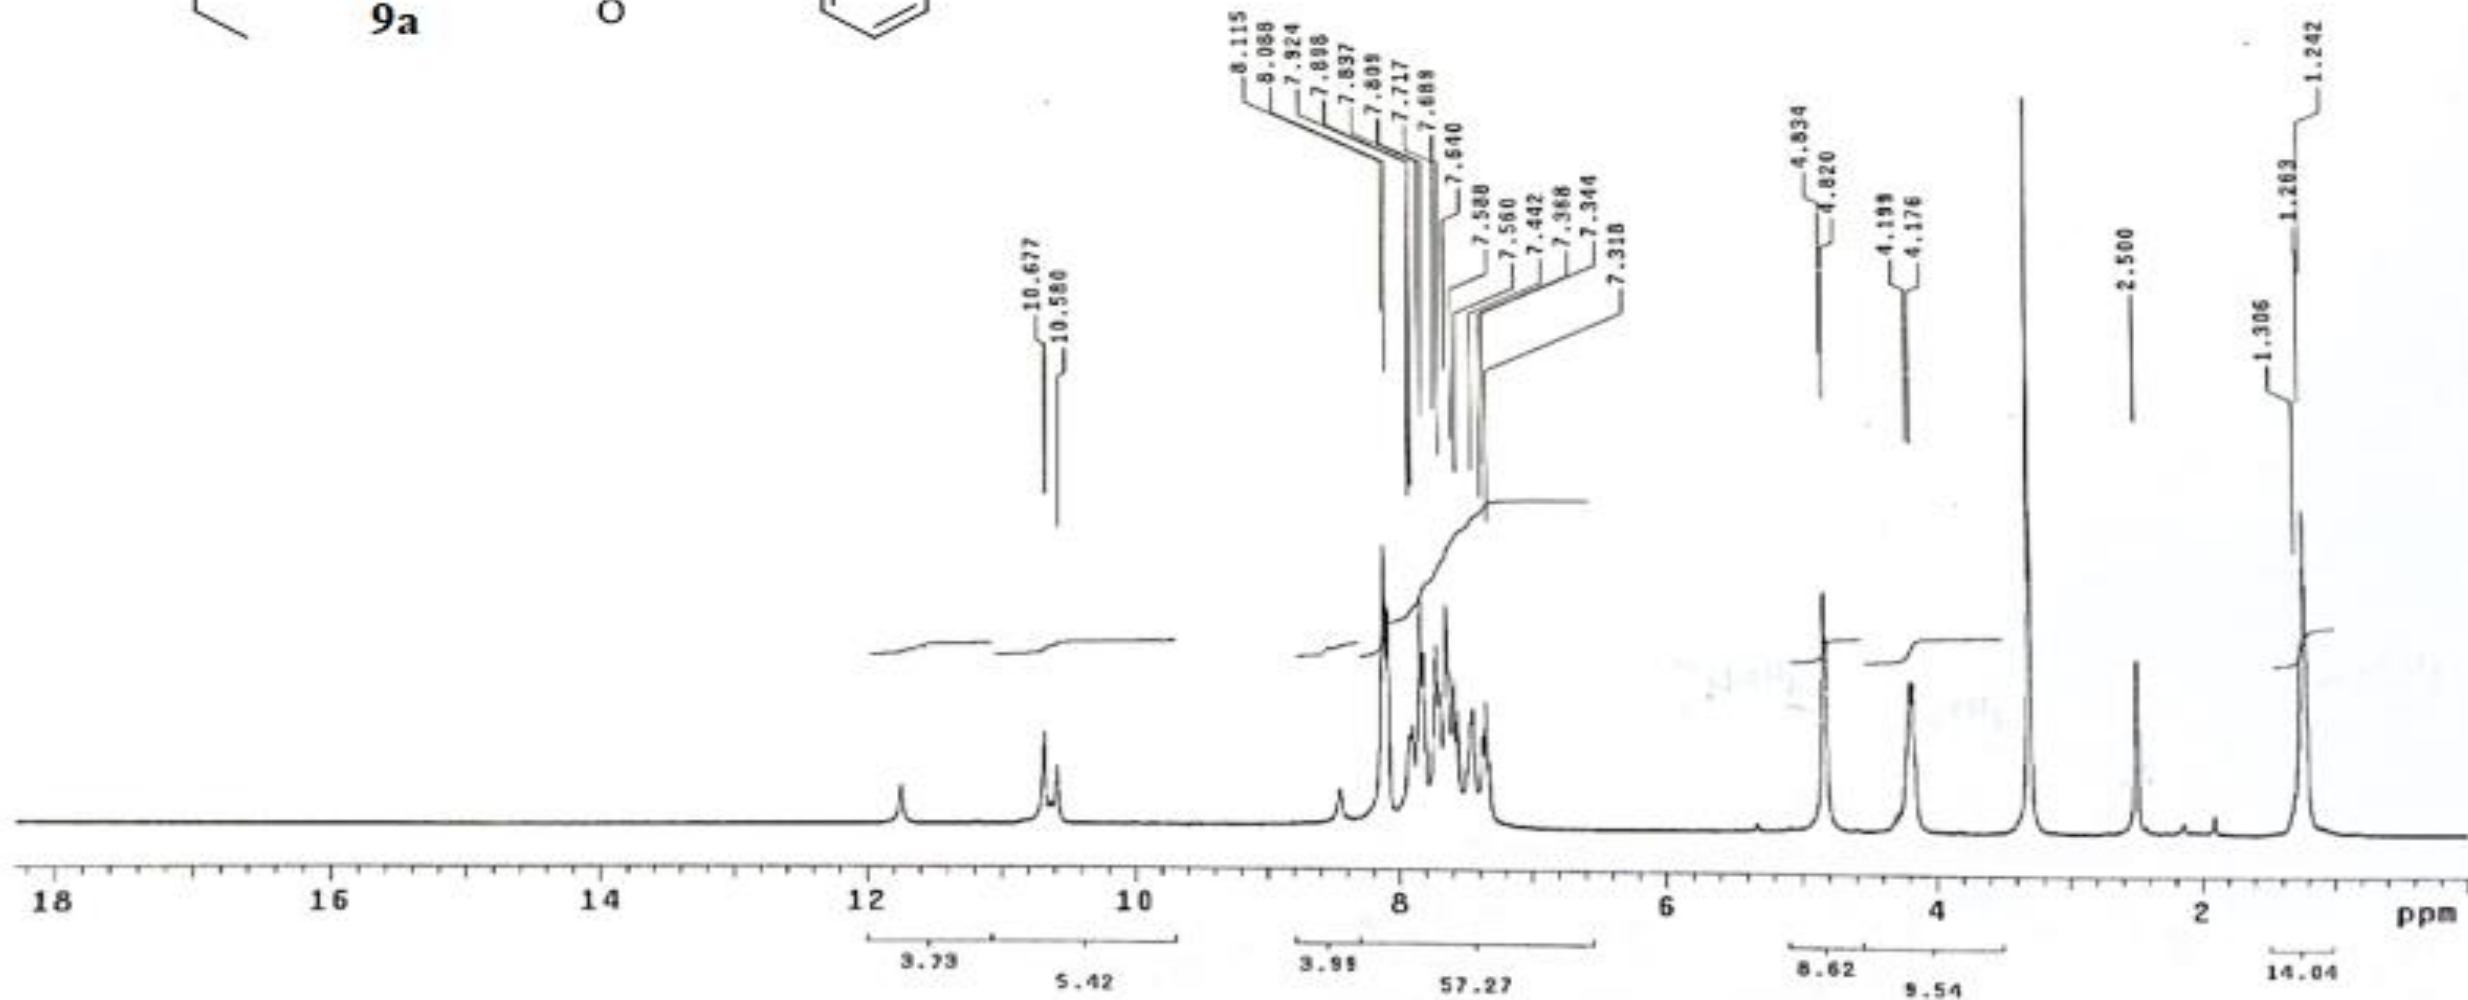

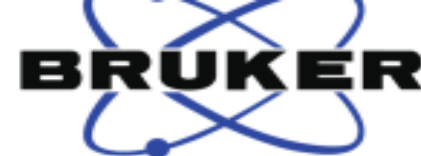

Current Data Parameters  
NAME K-C  
EXPNO 2  
PROCNO 1

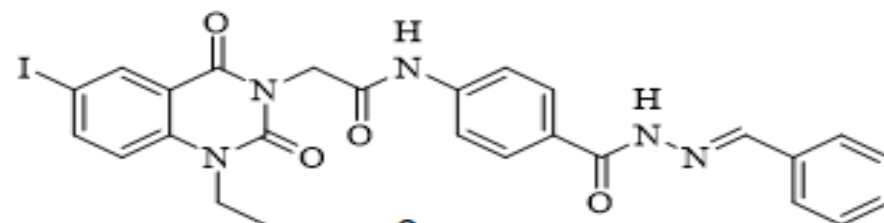

9a

FIDRES 0.366798 Hz  
AQ 1.3631488 sec  
RG 205.37  
DW 20.800 usec  
DE 6.50 usec  
TE 300.0 K  
D1 2.00000000 sec  
D11 0.03000000 sec  
TD0 1

----- CHANNEL f1 -----  
SFO1 100.6278588 MHz  
NUC1 13C  
P1 10.00 usec  
PLW1 47.00000000 W

----- CHANNEL f2 -----  
SFO2 400.1516006 MHz  
NUC2 1H  
CPDPRG[2] waltz16  
PCPD2 90.00 usec  
PLW2 18.00000000 W  
PLW12 0.34722000 W  
PLW13 0.28125000 W

F2 - Processing parameters  
SI 32768  
SF 100.6177975 MHz  
WDW EM  
SSB 0  
LB 1.00 Hz  
GB 0  
PC 1.40

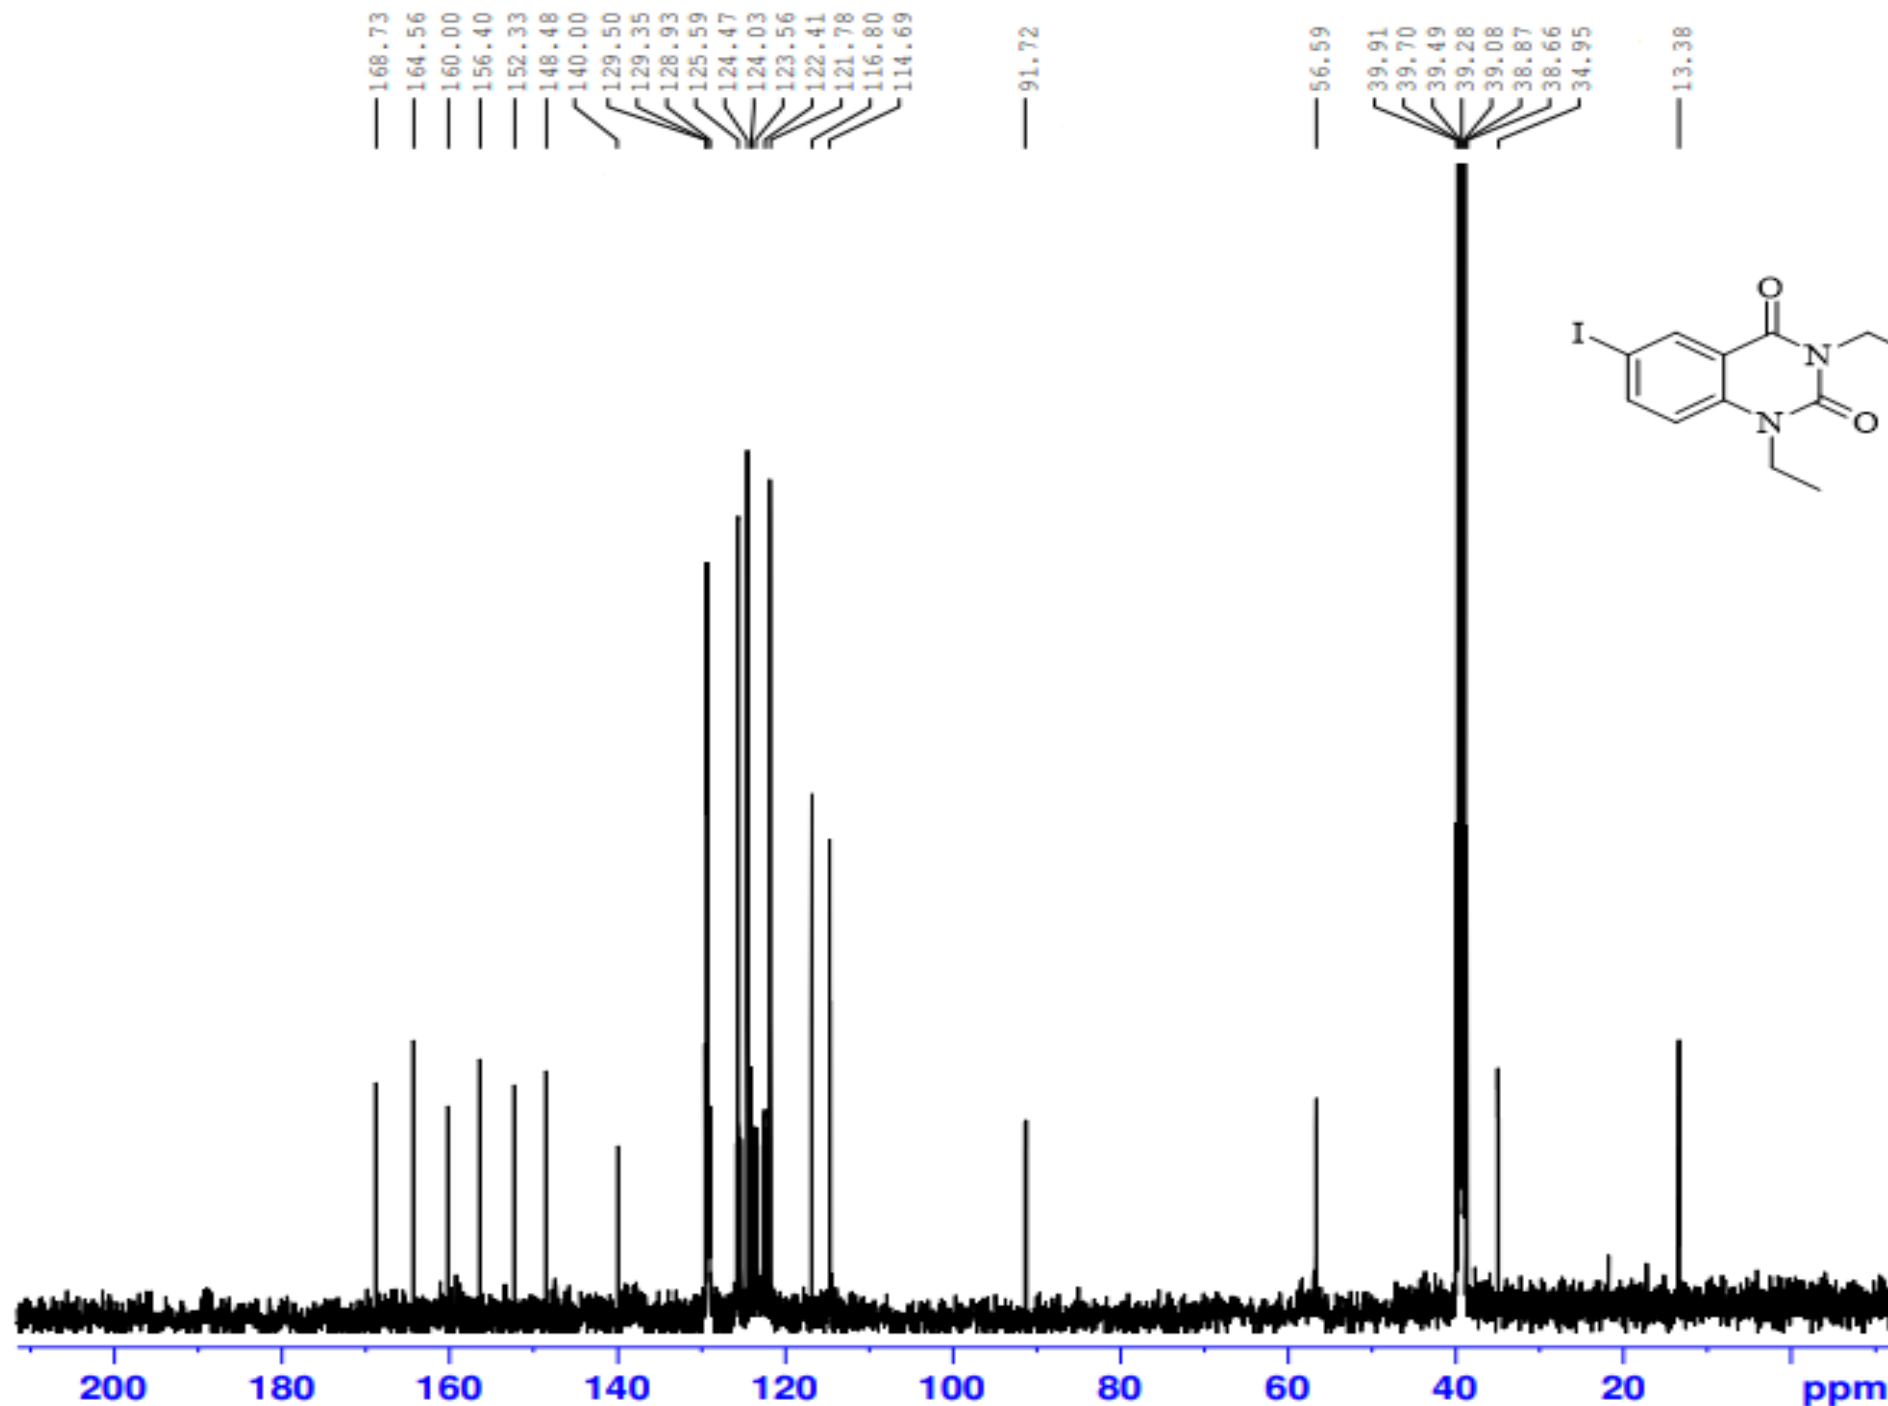

% Transmittance

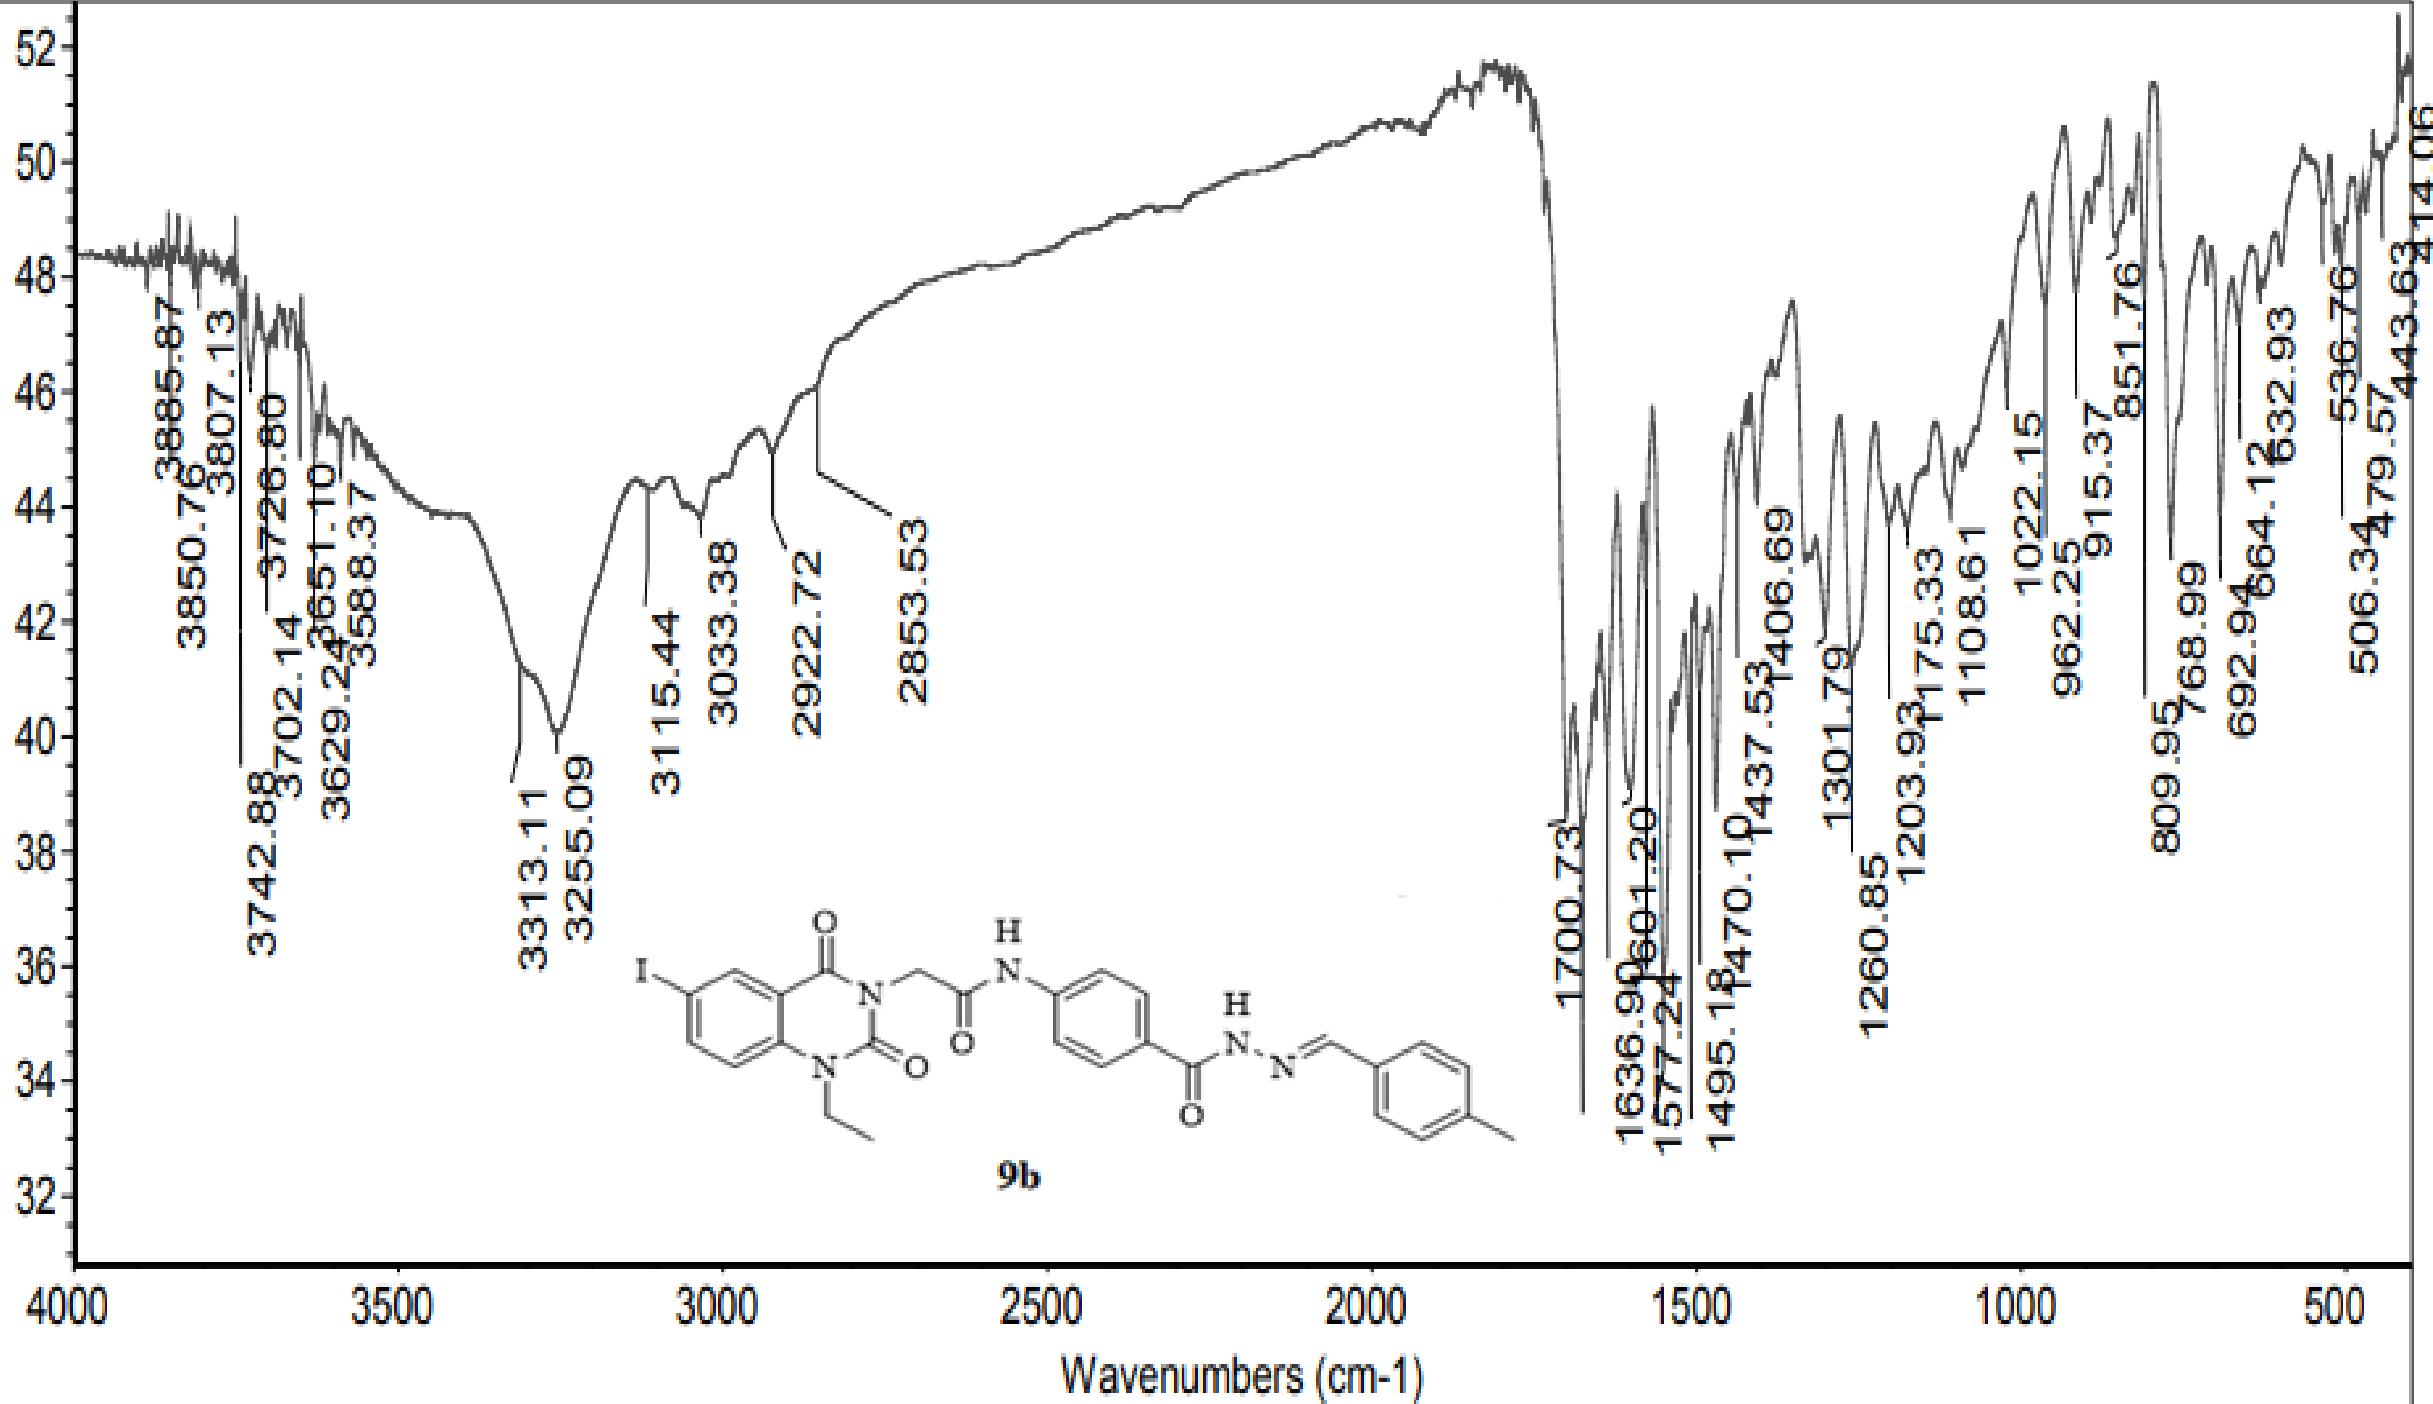



Relax. delay 1.000 sec  
 Pulse 74.1 degrees  
 Acq. time 4.004 sec  
 Width 8000.0 Hz  
 25 repetitions  
 OBSERVE M1, 300.0687875 MHz  
 DATA PROCESSING  
 FT size 65536  
 Total time 19 min, 19 sec

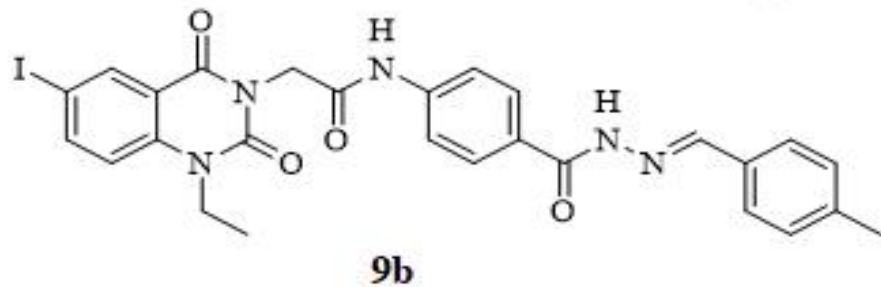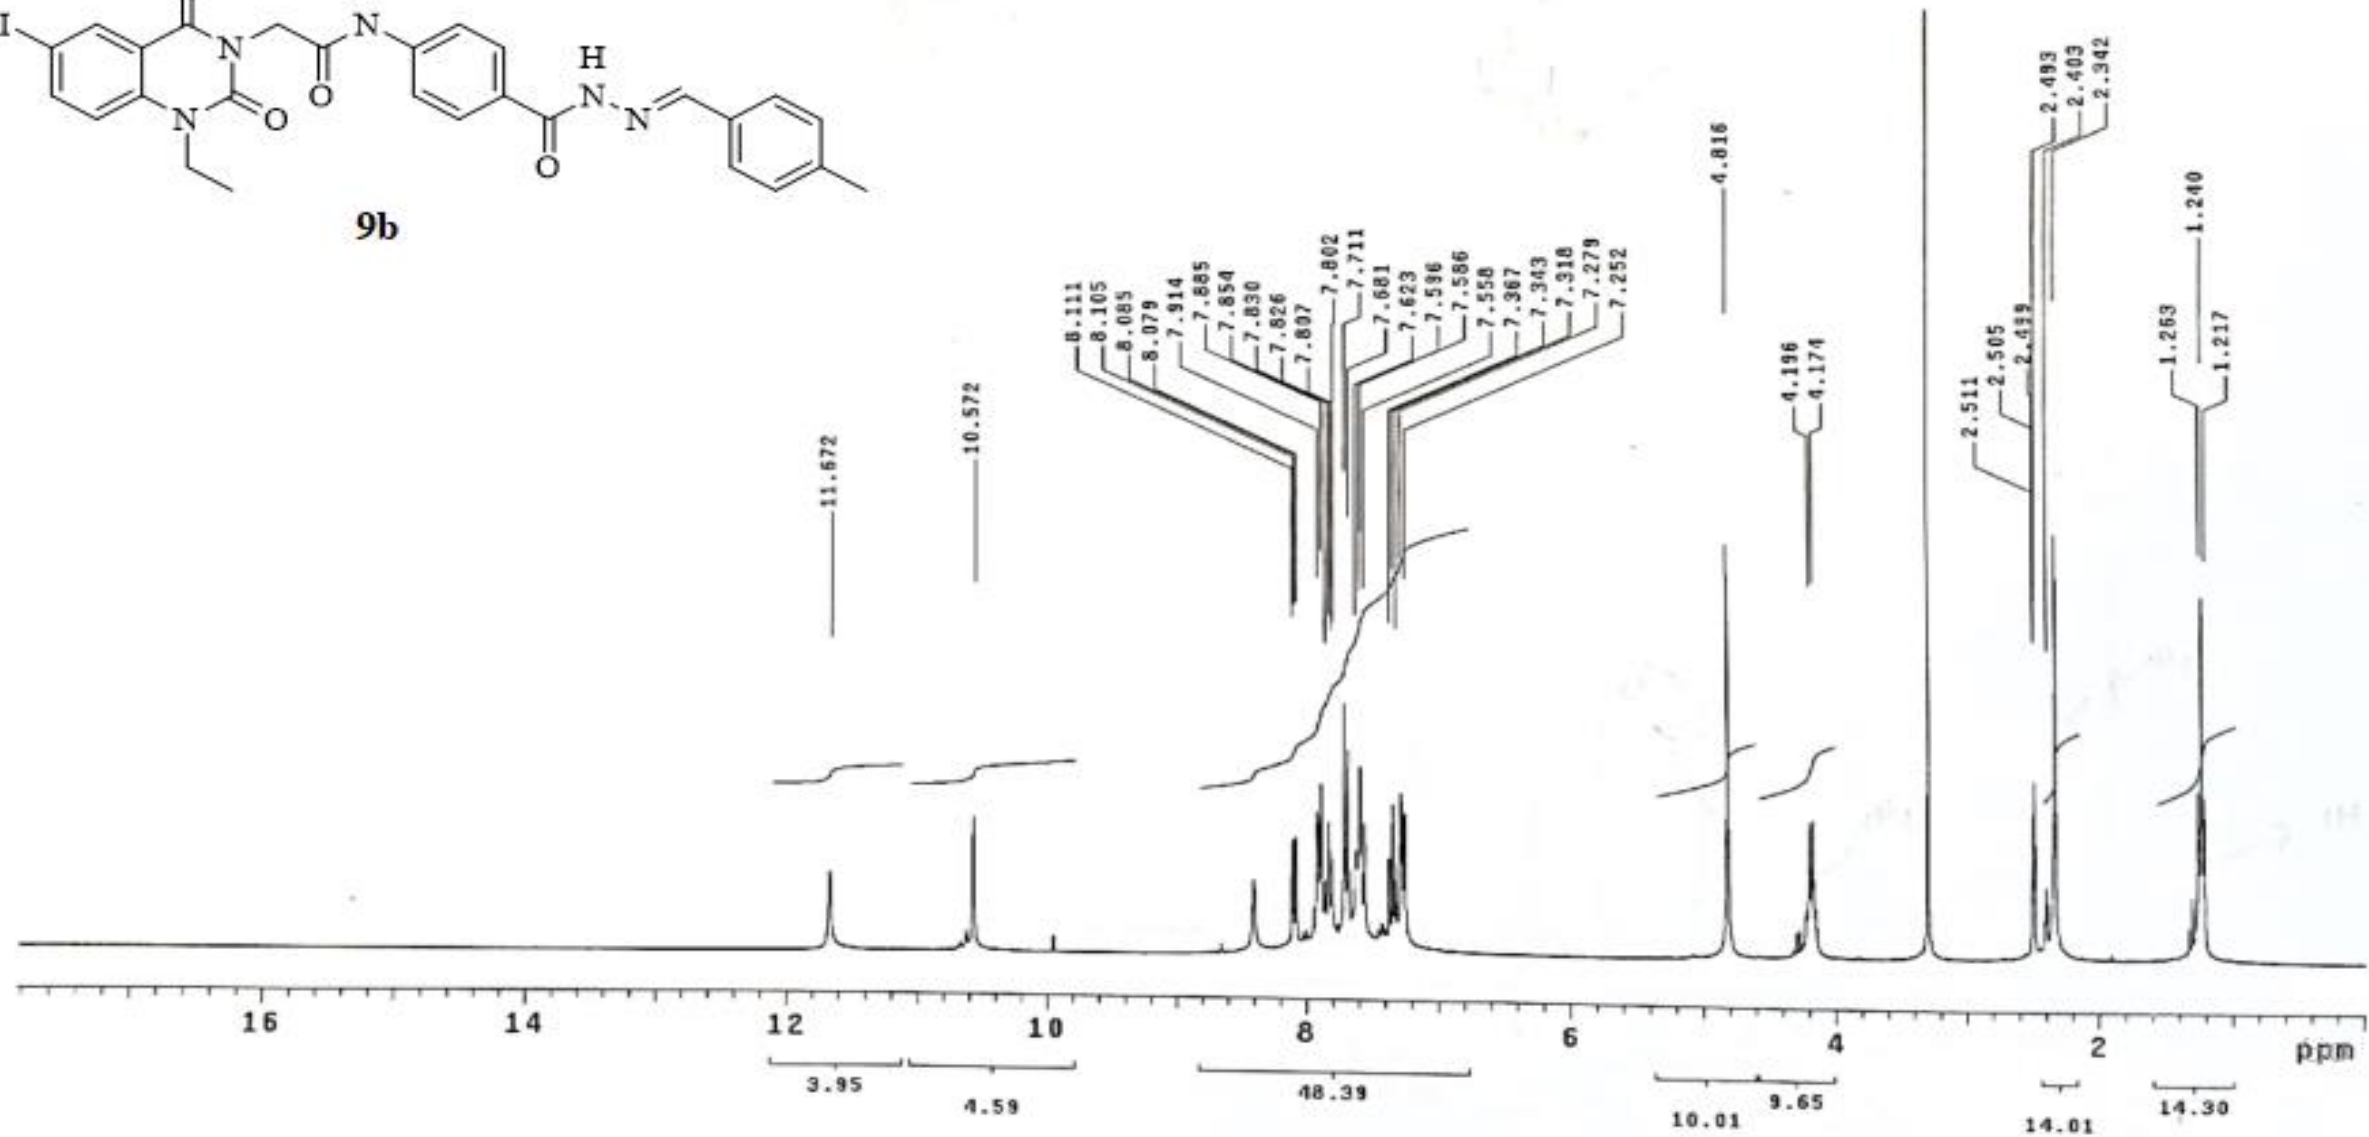

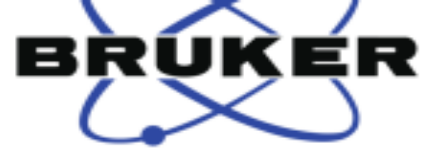

Current Data Parameters  
NAME K-F  
EXPNO 2  
PROCNO 1

F2 - Acquisition Parameters

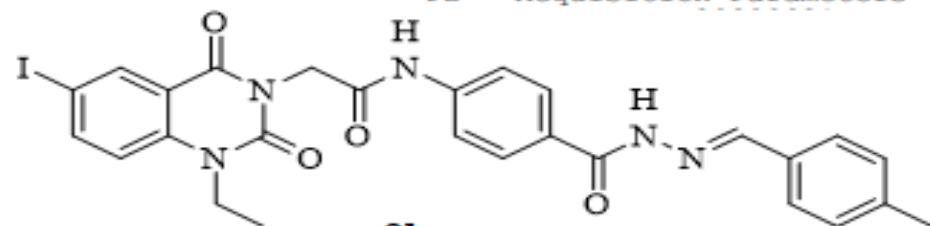

-----  
AQ 0.300750 sec  
RG 1.3631488 sec  
DW 205.37  
DE 20.800 usec  
TE 6.50 usec  
D1 300.0 K  
D11 2.00000000 sec  
D11 0.03000000 sec  
TD0 1

----- CHANNEL f1 -----  
SFO1 100.6278588 MHz  
NUC1 13C  
P1 10.00 usec  
PLW1 47.00000000 W

----- CHANNEL f2 -----  
SFO2 400.1516006 MHz  
NUC2 1H  
CPDPRG[2] waltz16  
PCPD2 90.00 usec  
PLW2 18.00000000 W  
PLW12 0.34722000 W  
PLW13 0.28125000 W

F2 - Processing parameters  
SI 32768  
SF 100.6177975 MHz  
WDW EM  
SSB 0  
LB 1.00 Hz  
GB 0  
PC 1.40

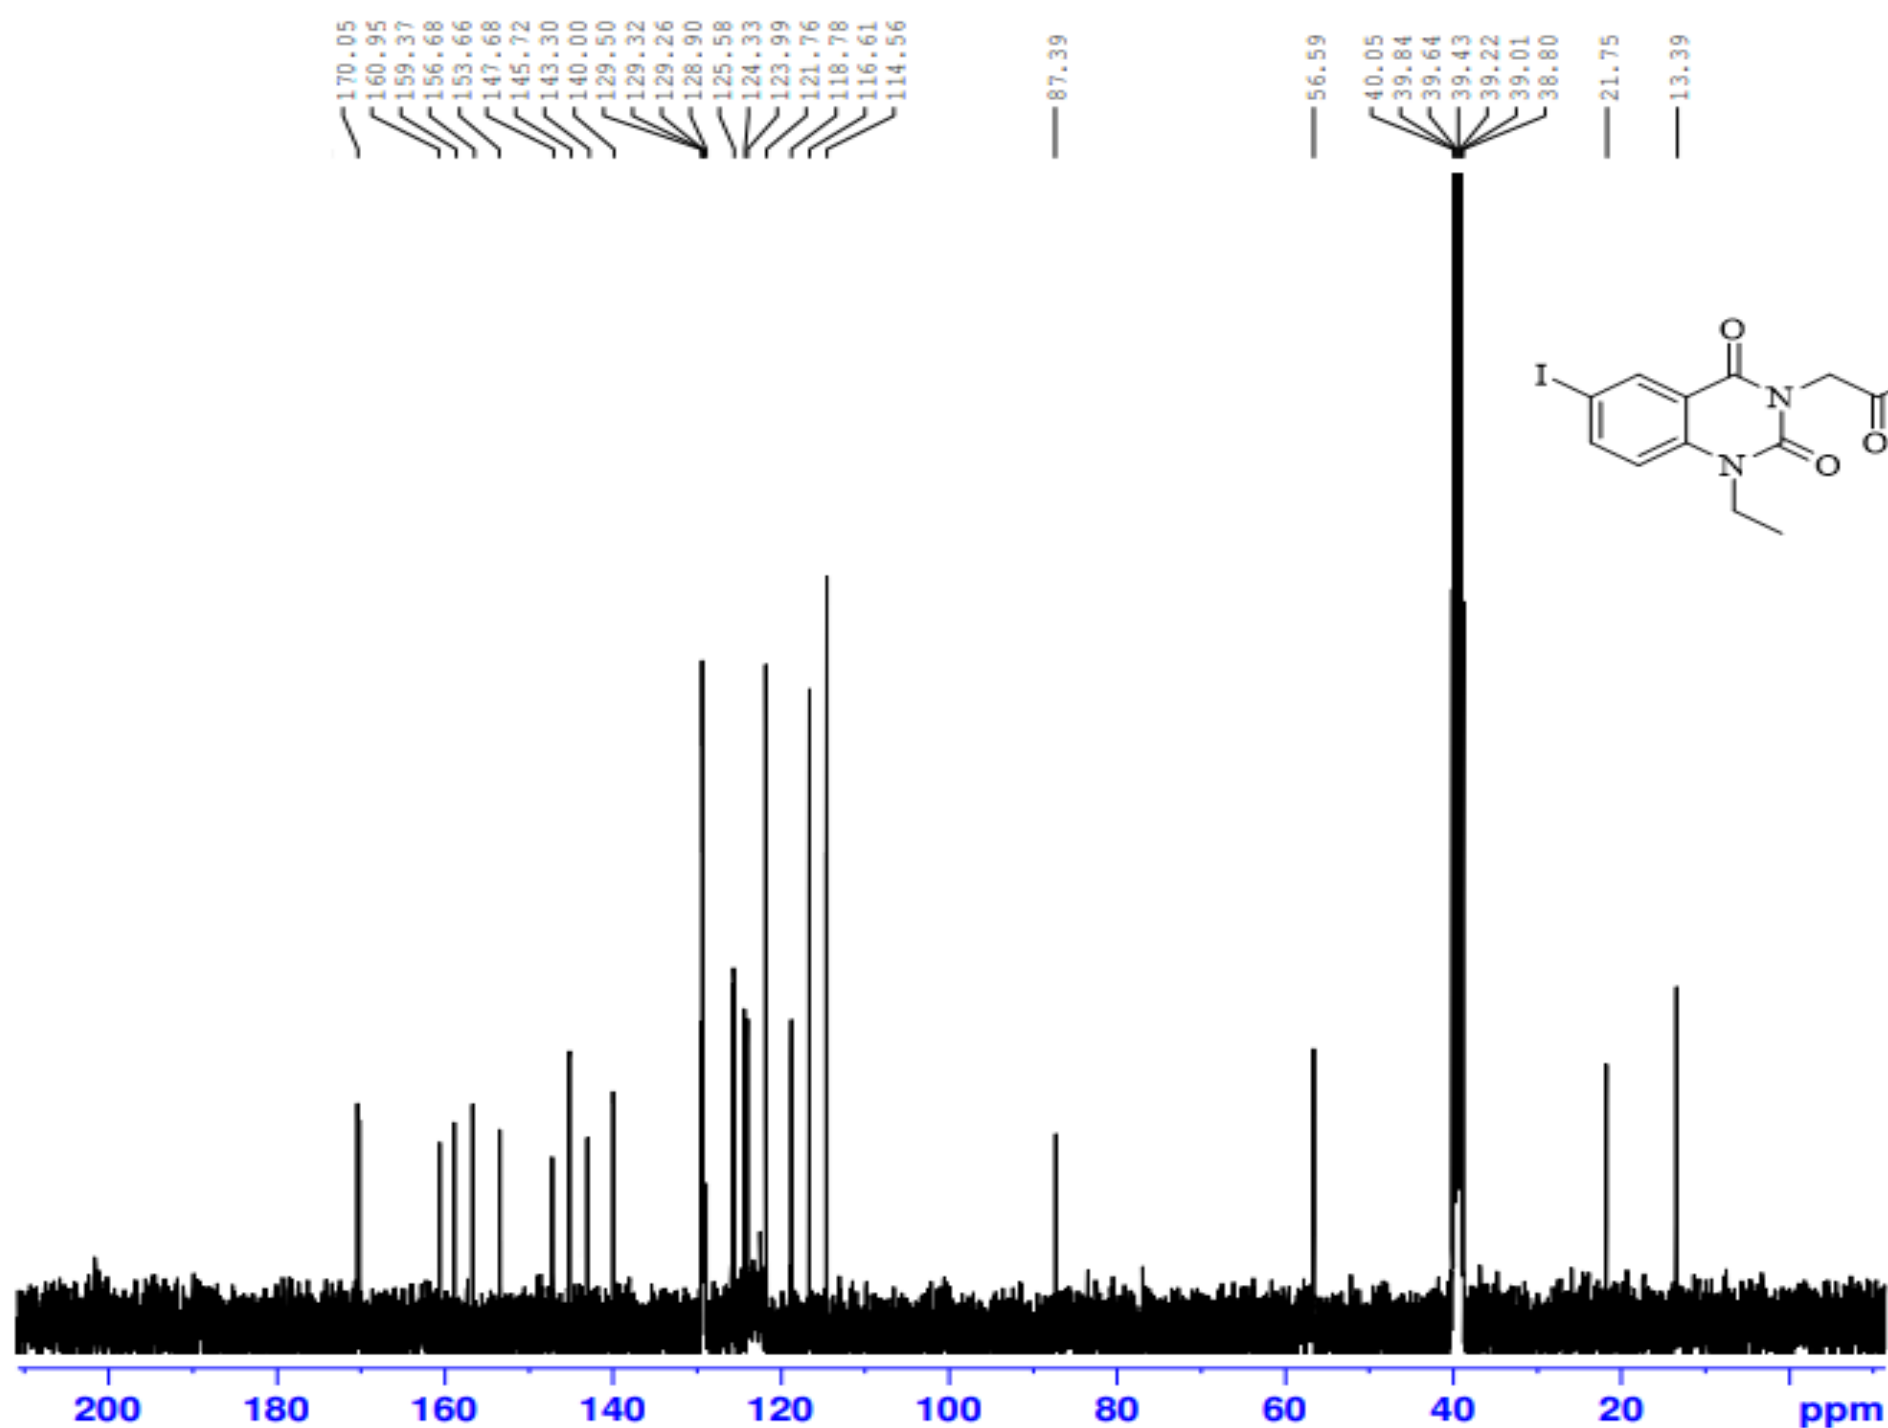

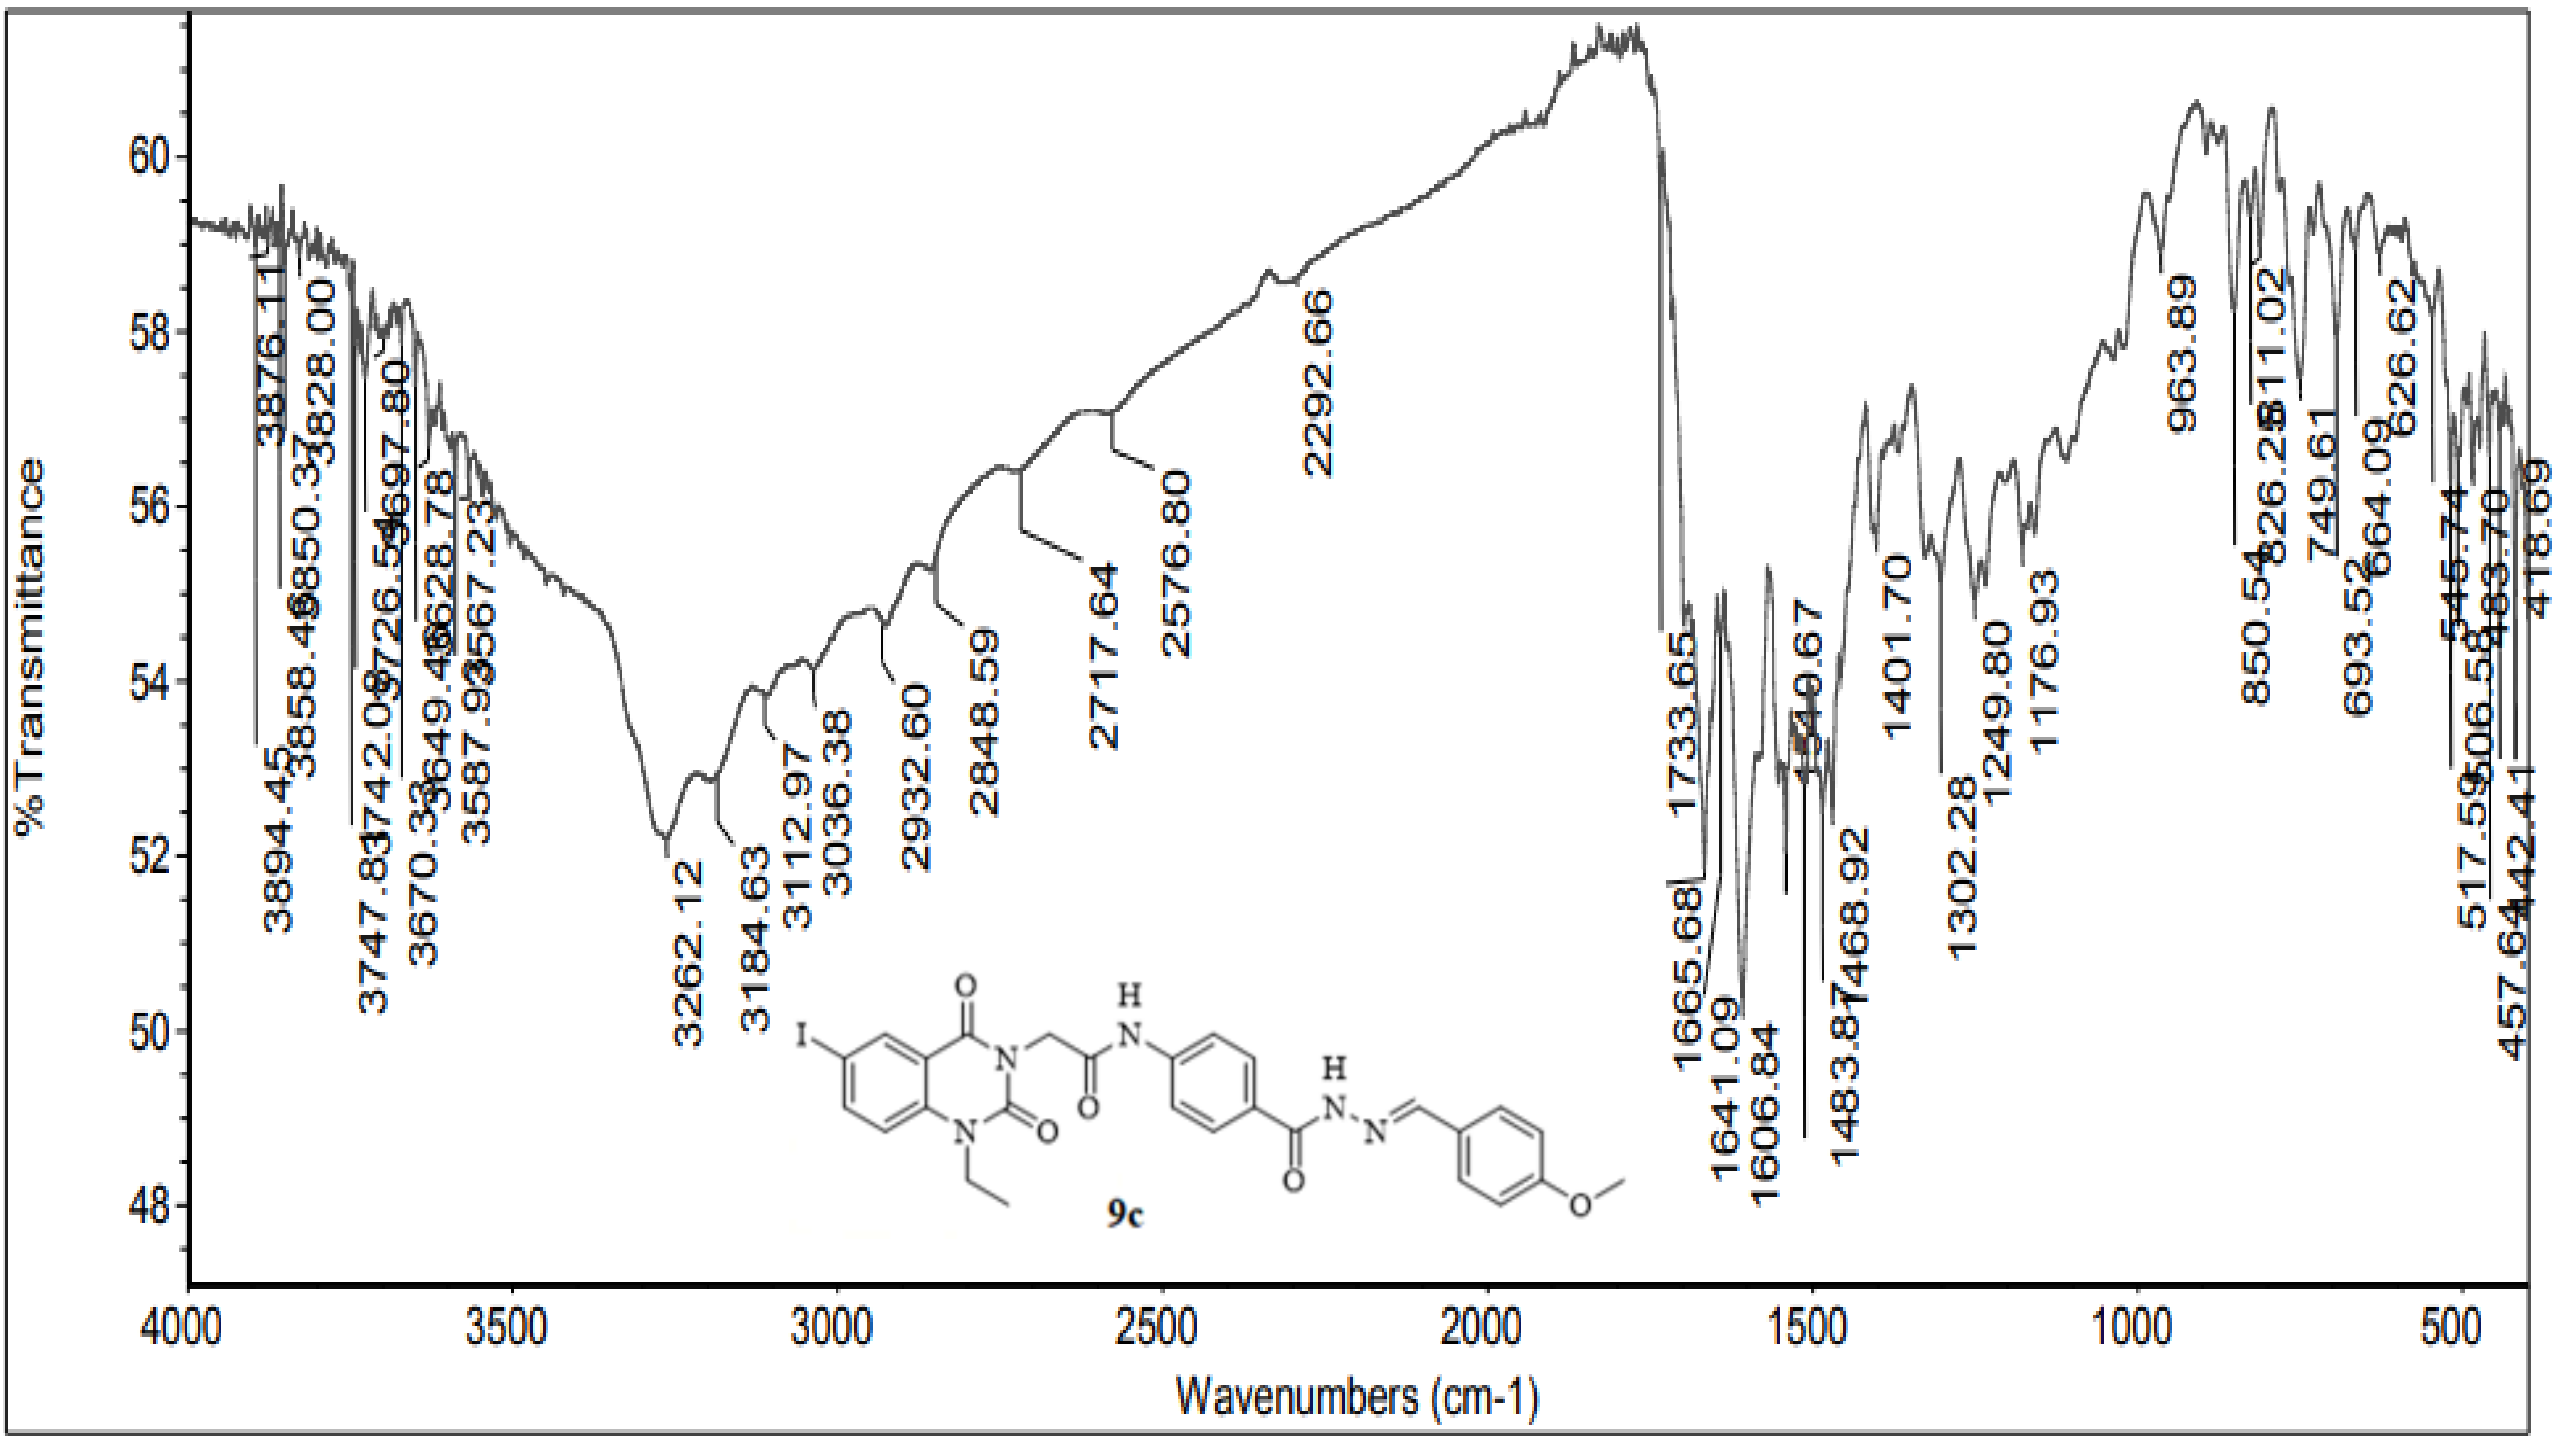

Relax. delay 1.000 sec  
Pulse 74.1 degrees  
Acq. time 4.004 sec  
Width 8000.0 Hz  
10 repetitions  
OBSERVE H1, 300.0687875 MHz  
DATA PROCESSING  
FT size 65536  
Total time 19 min, 19 sec

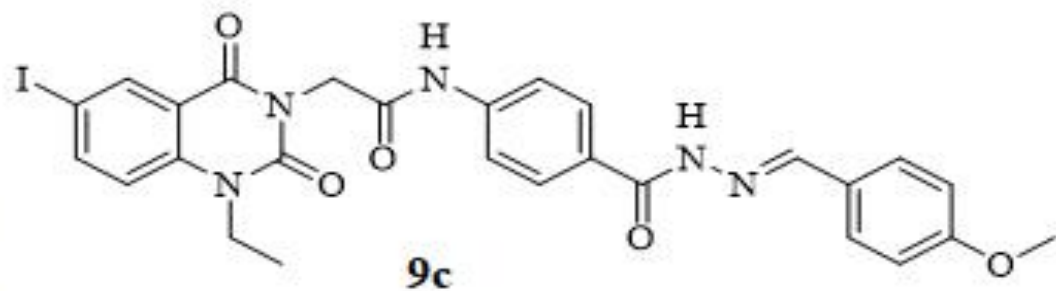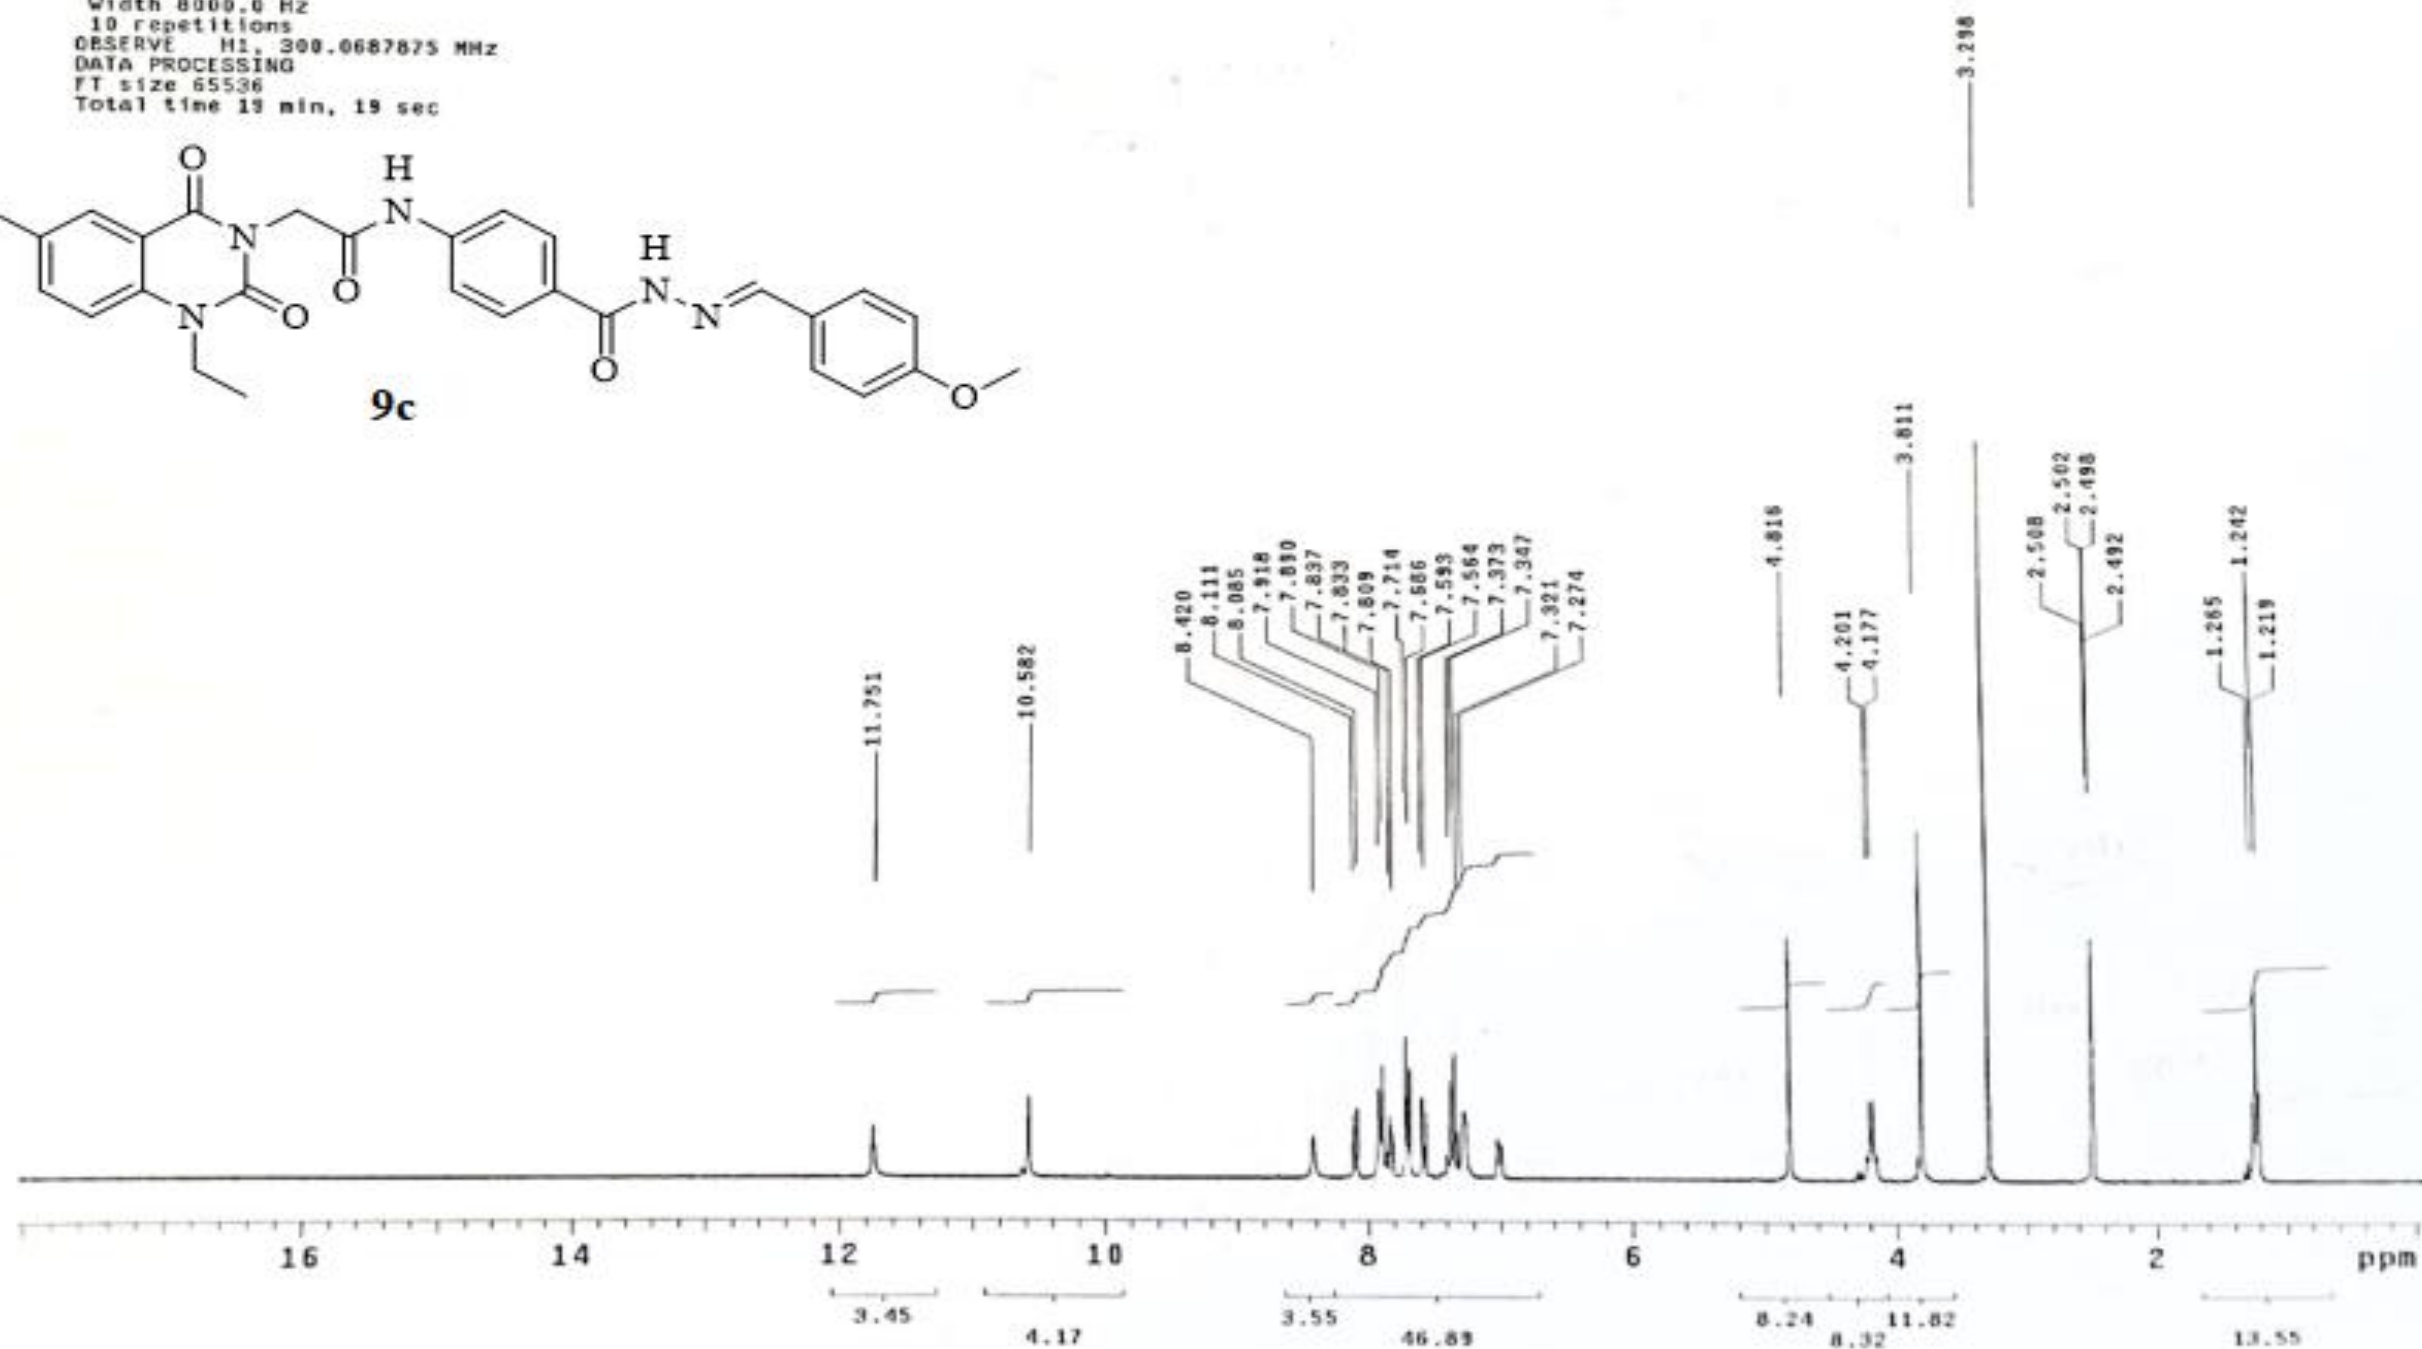

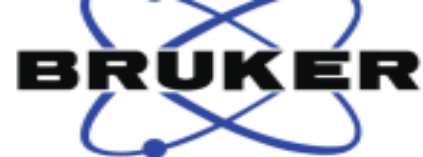

Current Data Parameters  
NAME K-A  
EXPNO 2  
PROCNO 1

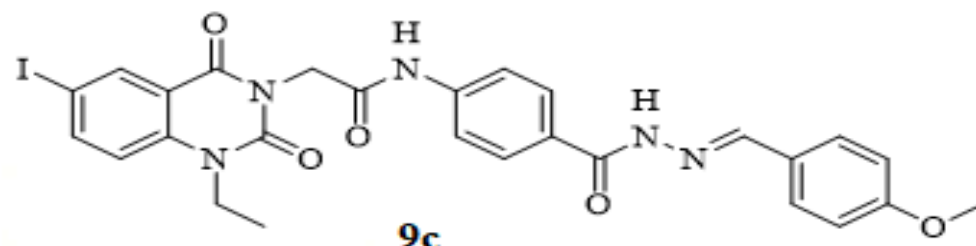

FIDRES 0.366798 HZ  
AQ 1.3631488 sec  
RG 205.37  
DW 20.800 usec  
DE 6.50 usec  
TE 300.0 K  
D1 2.0000000 sec  
D11 0.0300000 sec  
TD0 1

----- CHANNEL f1 -----  
SFO1 100.6278588 MHz  
NUC1 13C  
P1 10.00 usec  
PLW1 47.00000000 W

----- CHANNEL f2 -----  
SFO2 400.1516006 MHz  
NUC2 1H  
CPDPRG[2] waltz16  
PCPD2 90.00 usec  
PLW2 18.00000000 W  
PLW12 0.34722000 W  
PLW13 0.28125000 W

F2 - Processing parameters  
SI 32768  
SF 100.6177975 MHz  
WDW EM  
SSB 0  
LB 1.00 Hz  
GB 0  
PC 1.40

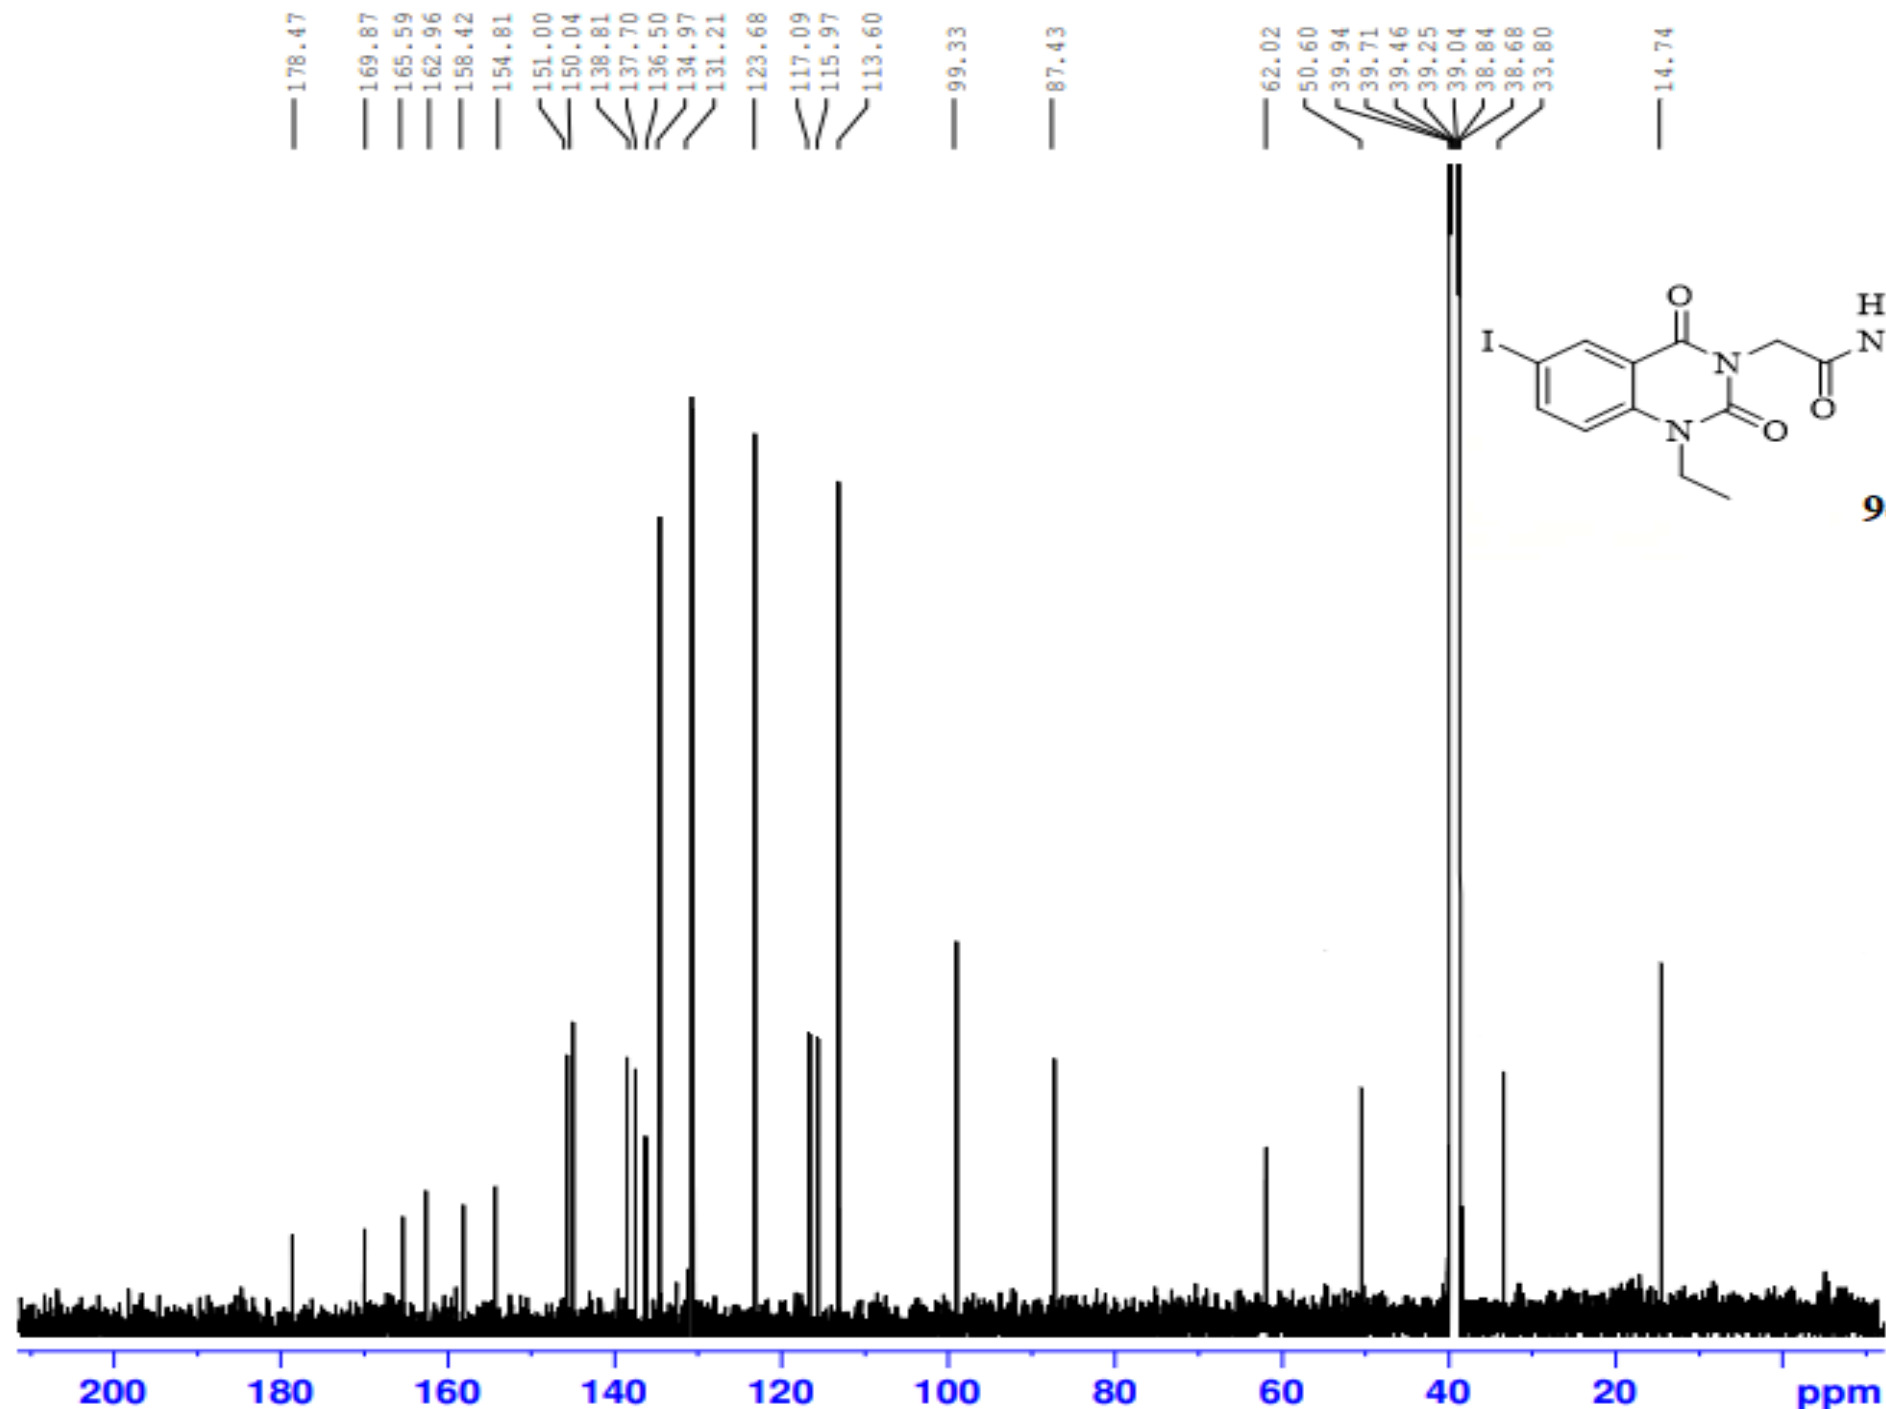

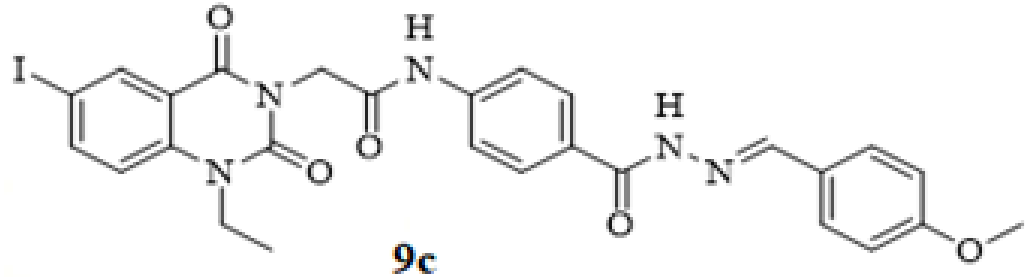

Relative Abundance

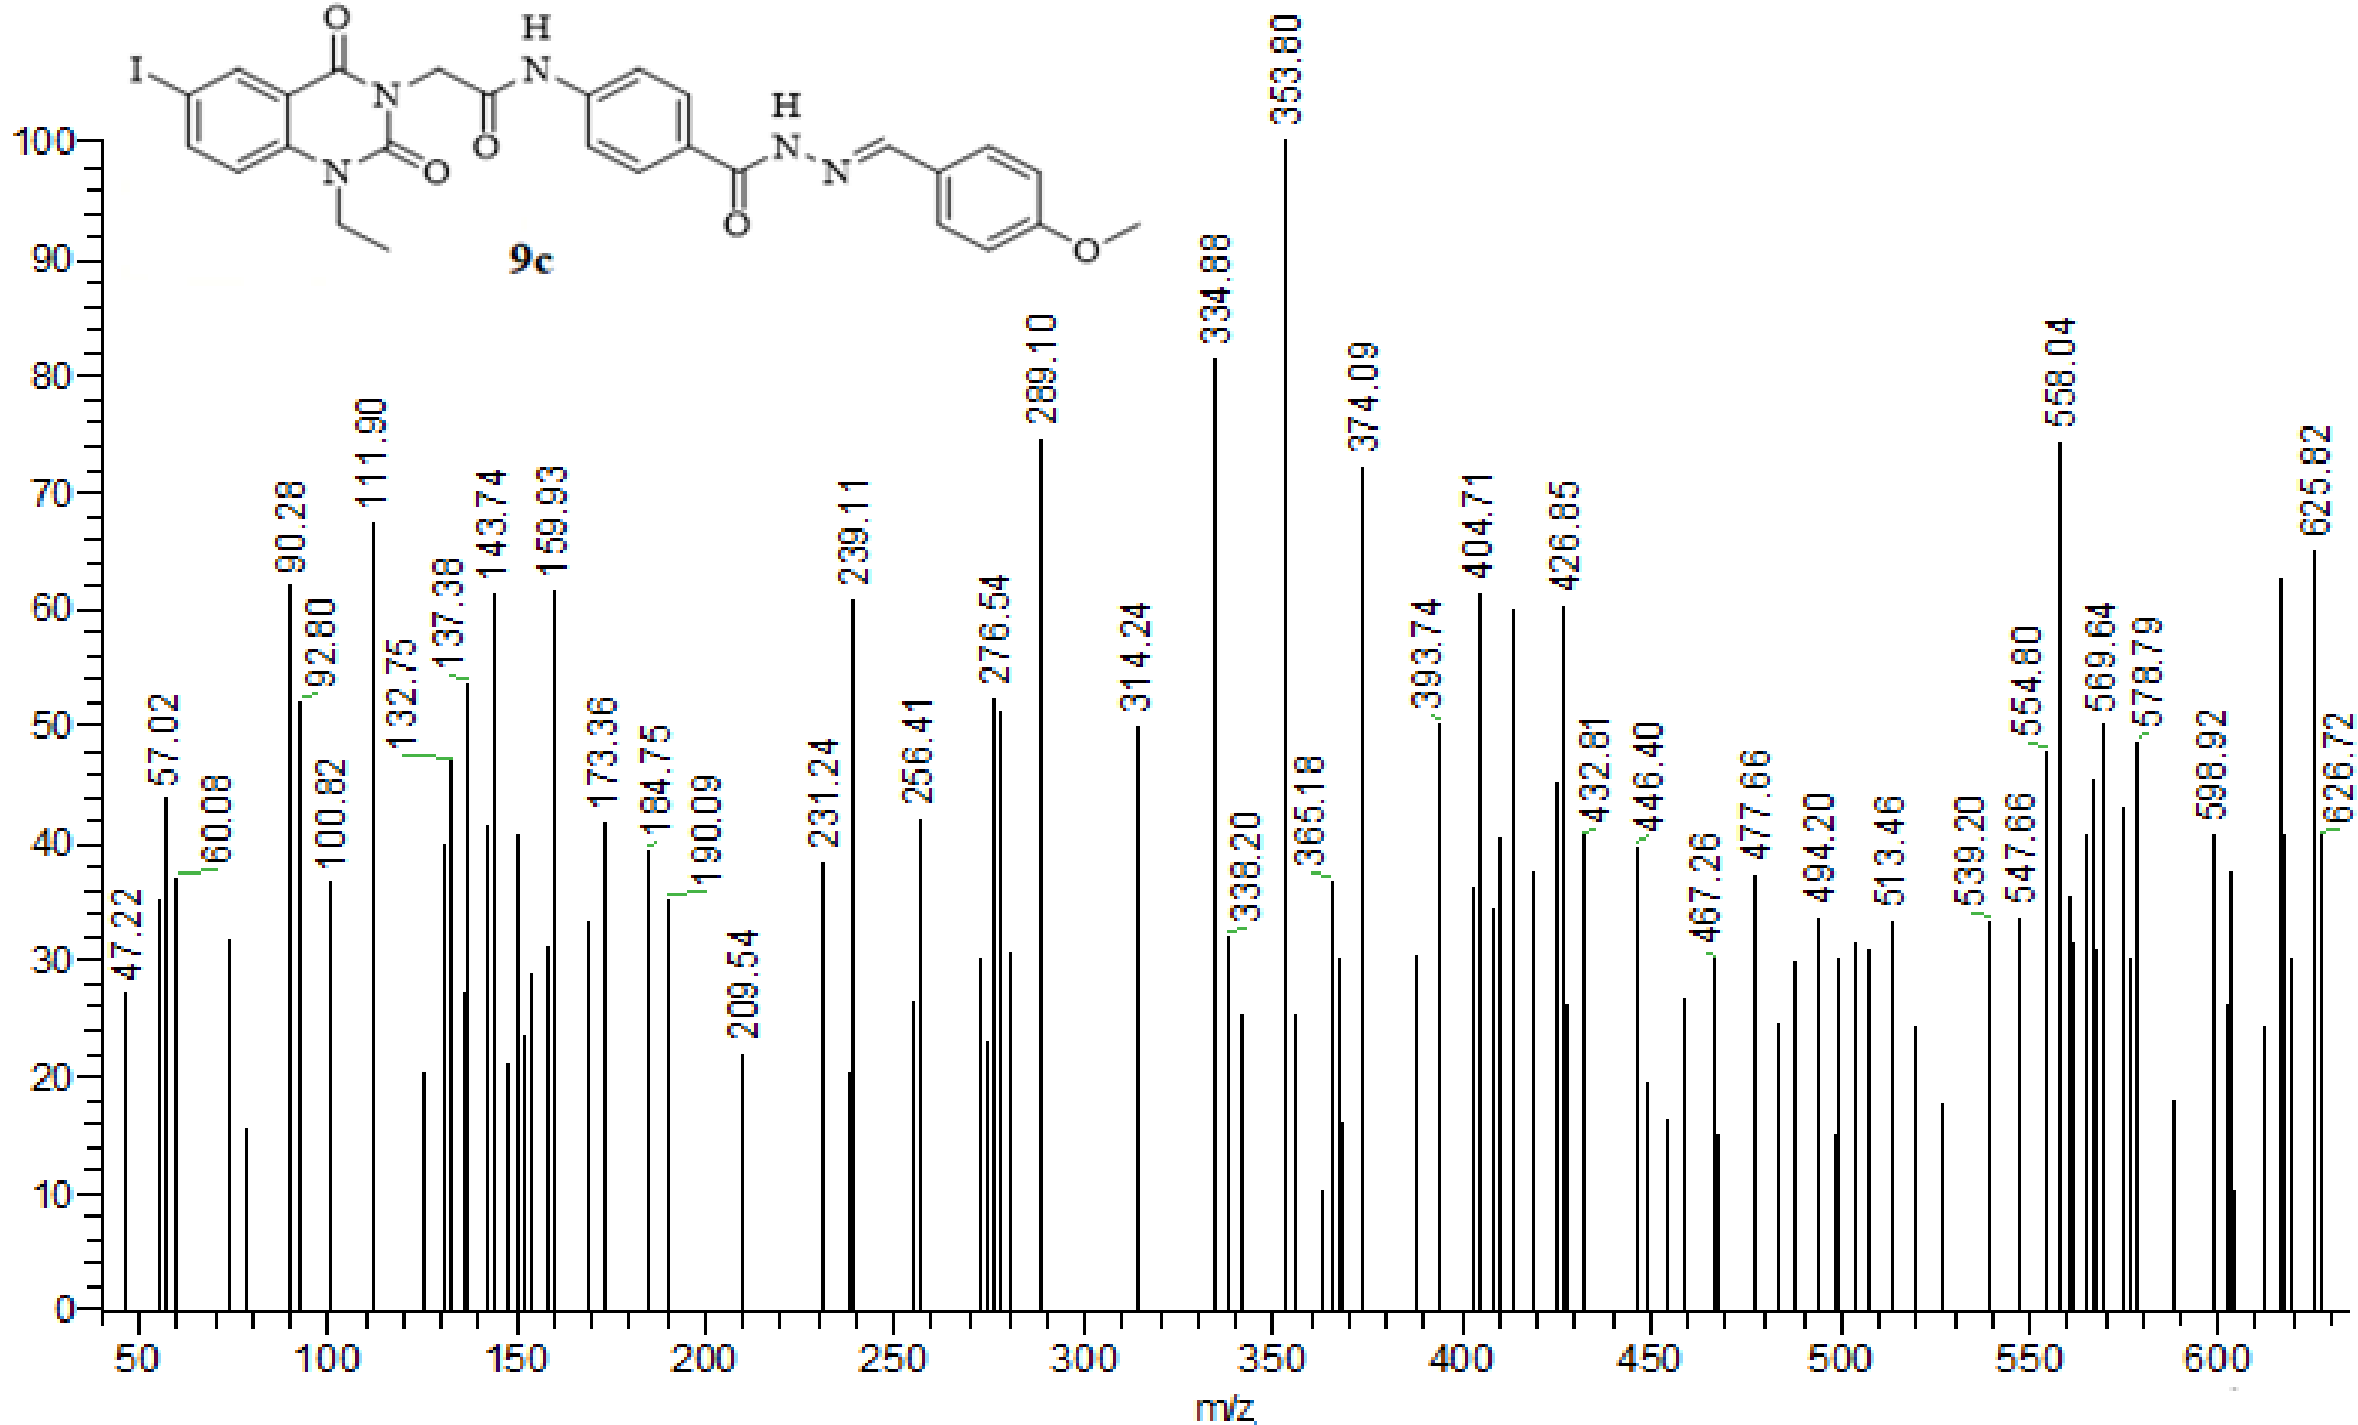

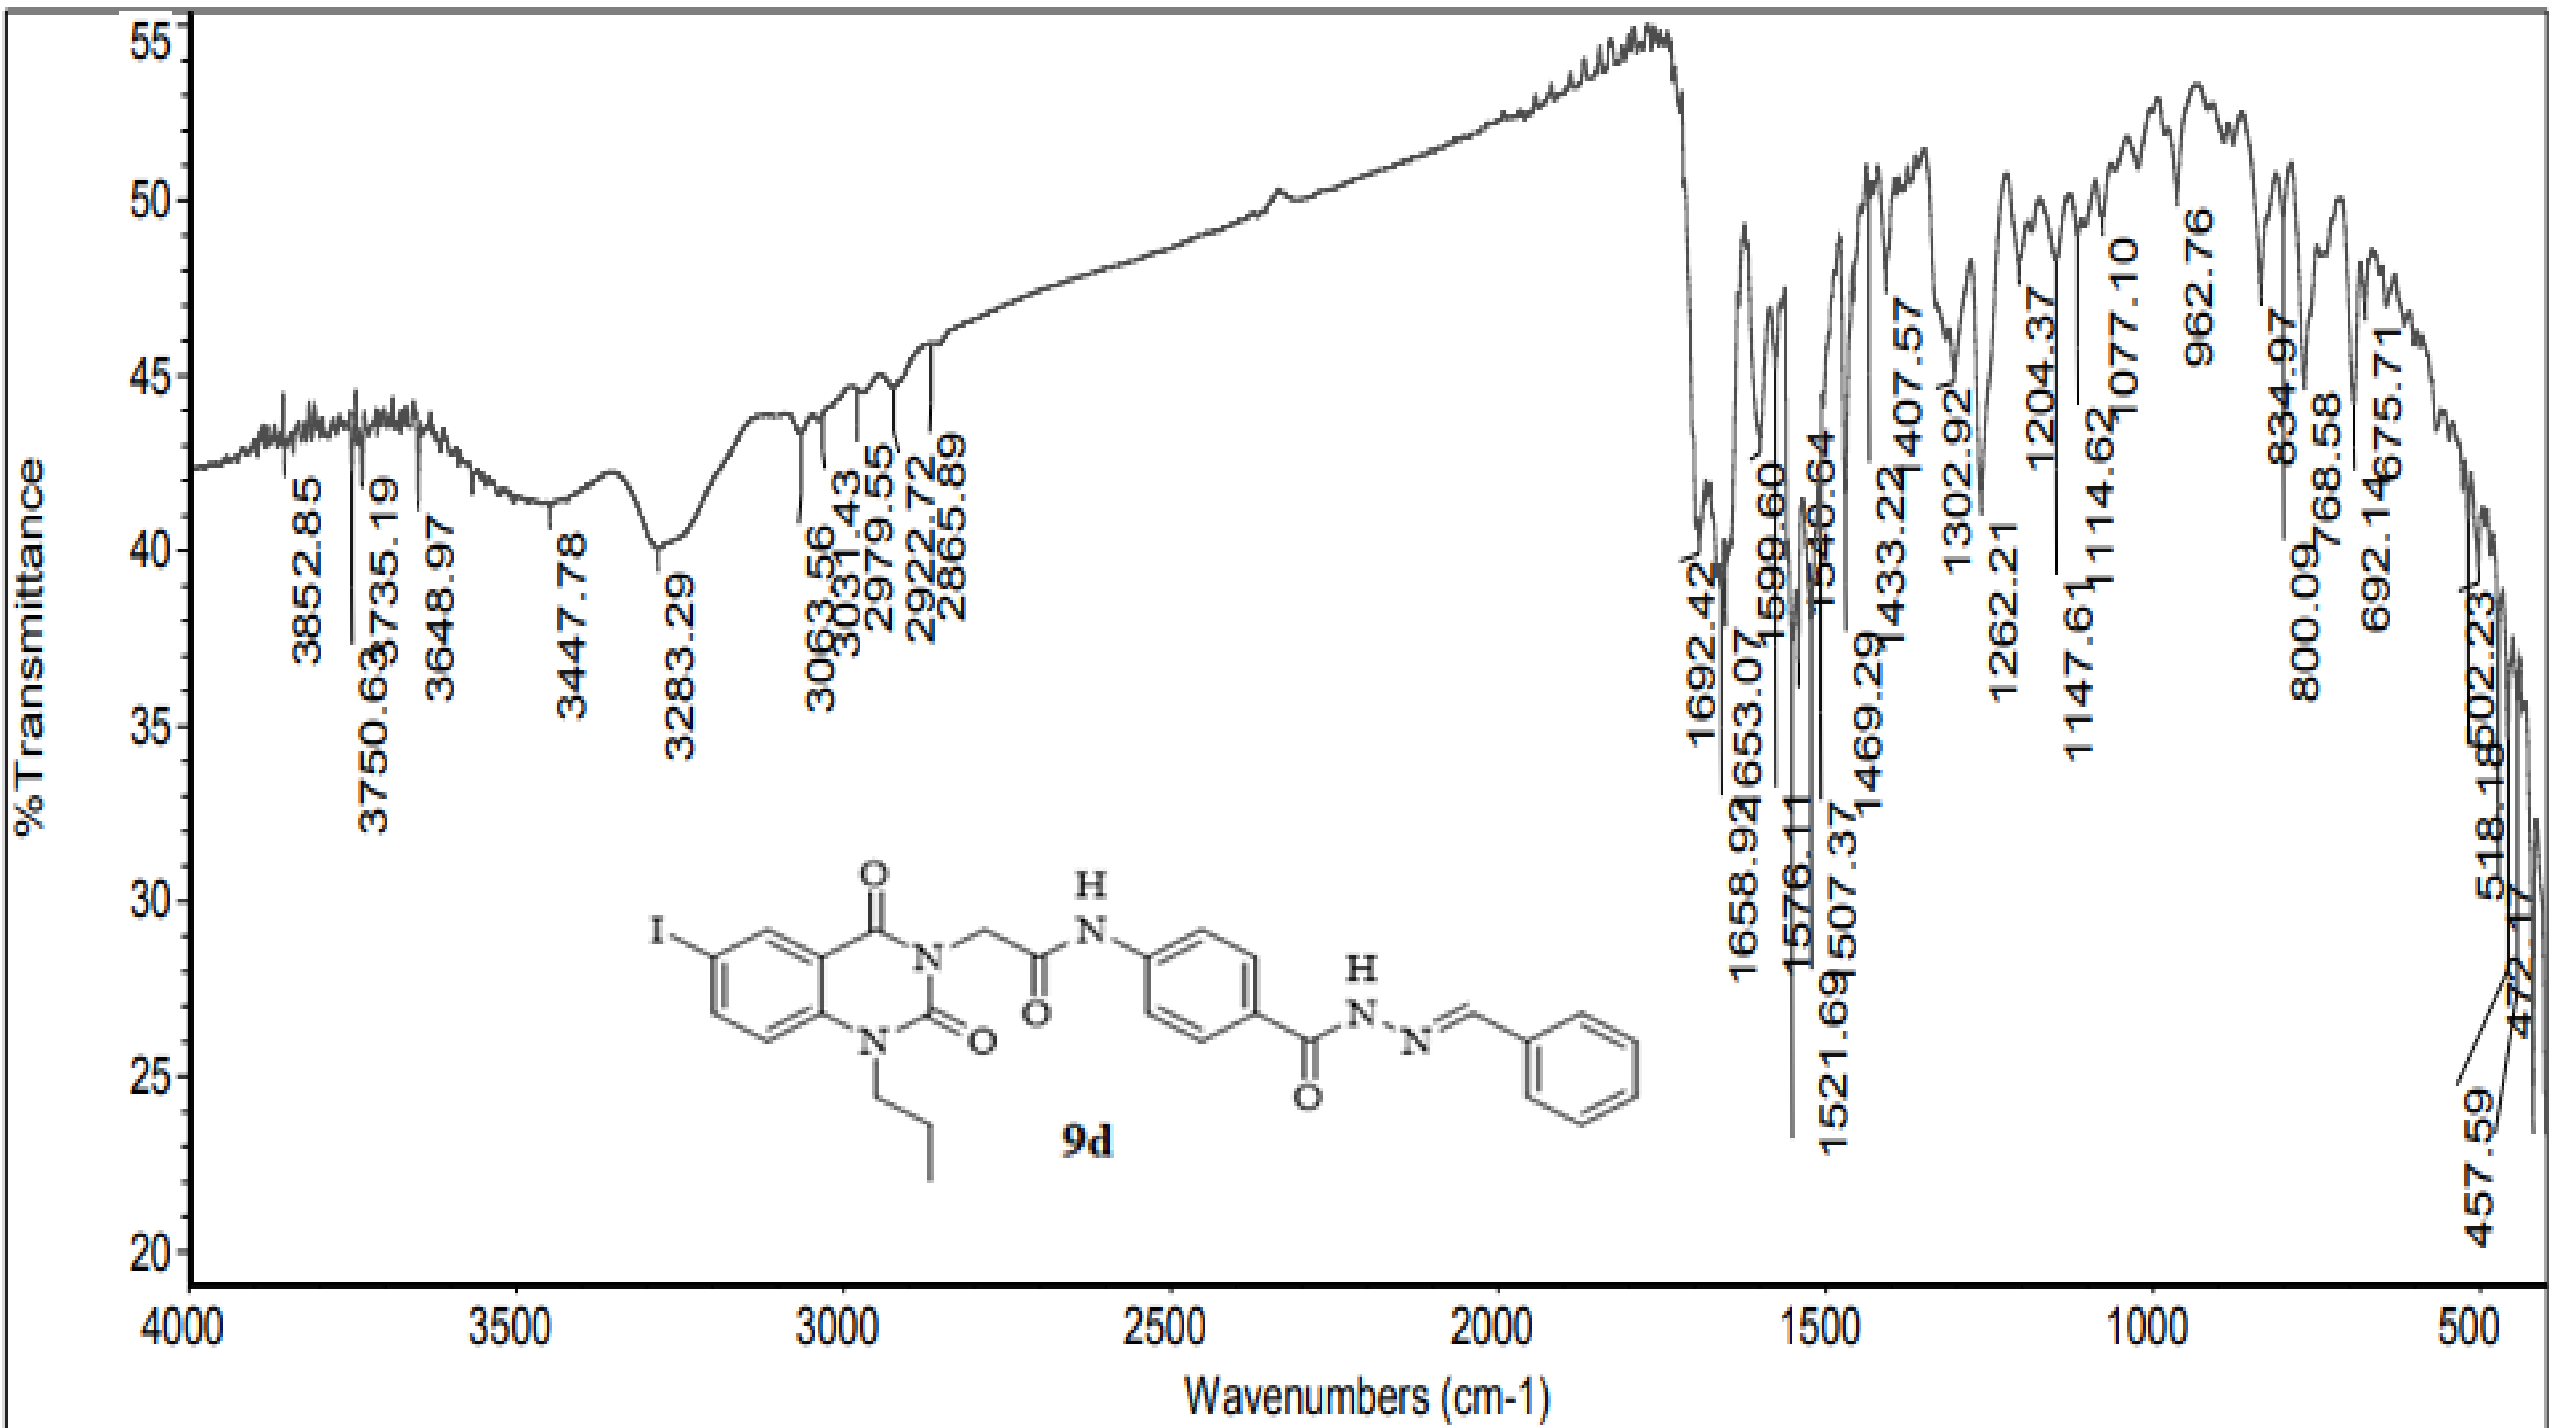

Relax. delay 1.000 sec  
Pulse 74.1 degrees  
Acq. time 4.004 sec  
Width 8000.0 Hz  
14 repetitions  
OBSERVE H1, 300.0687875 MHz  
DATA PROCESSING  
FT size 65536  
Total time 19 min, 19 sec

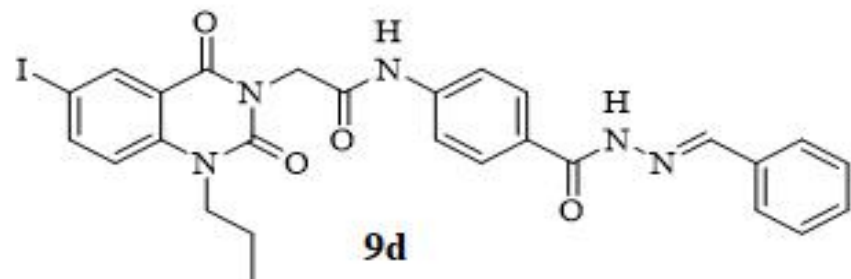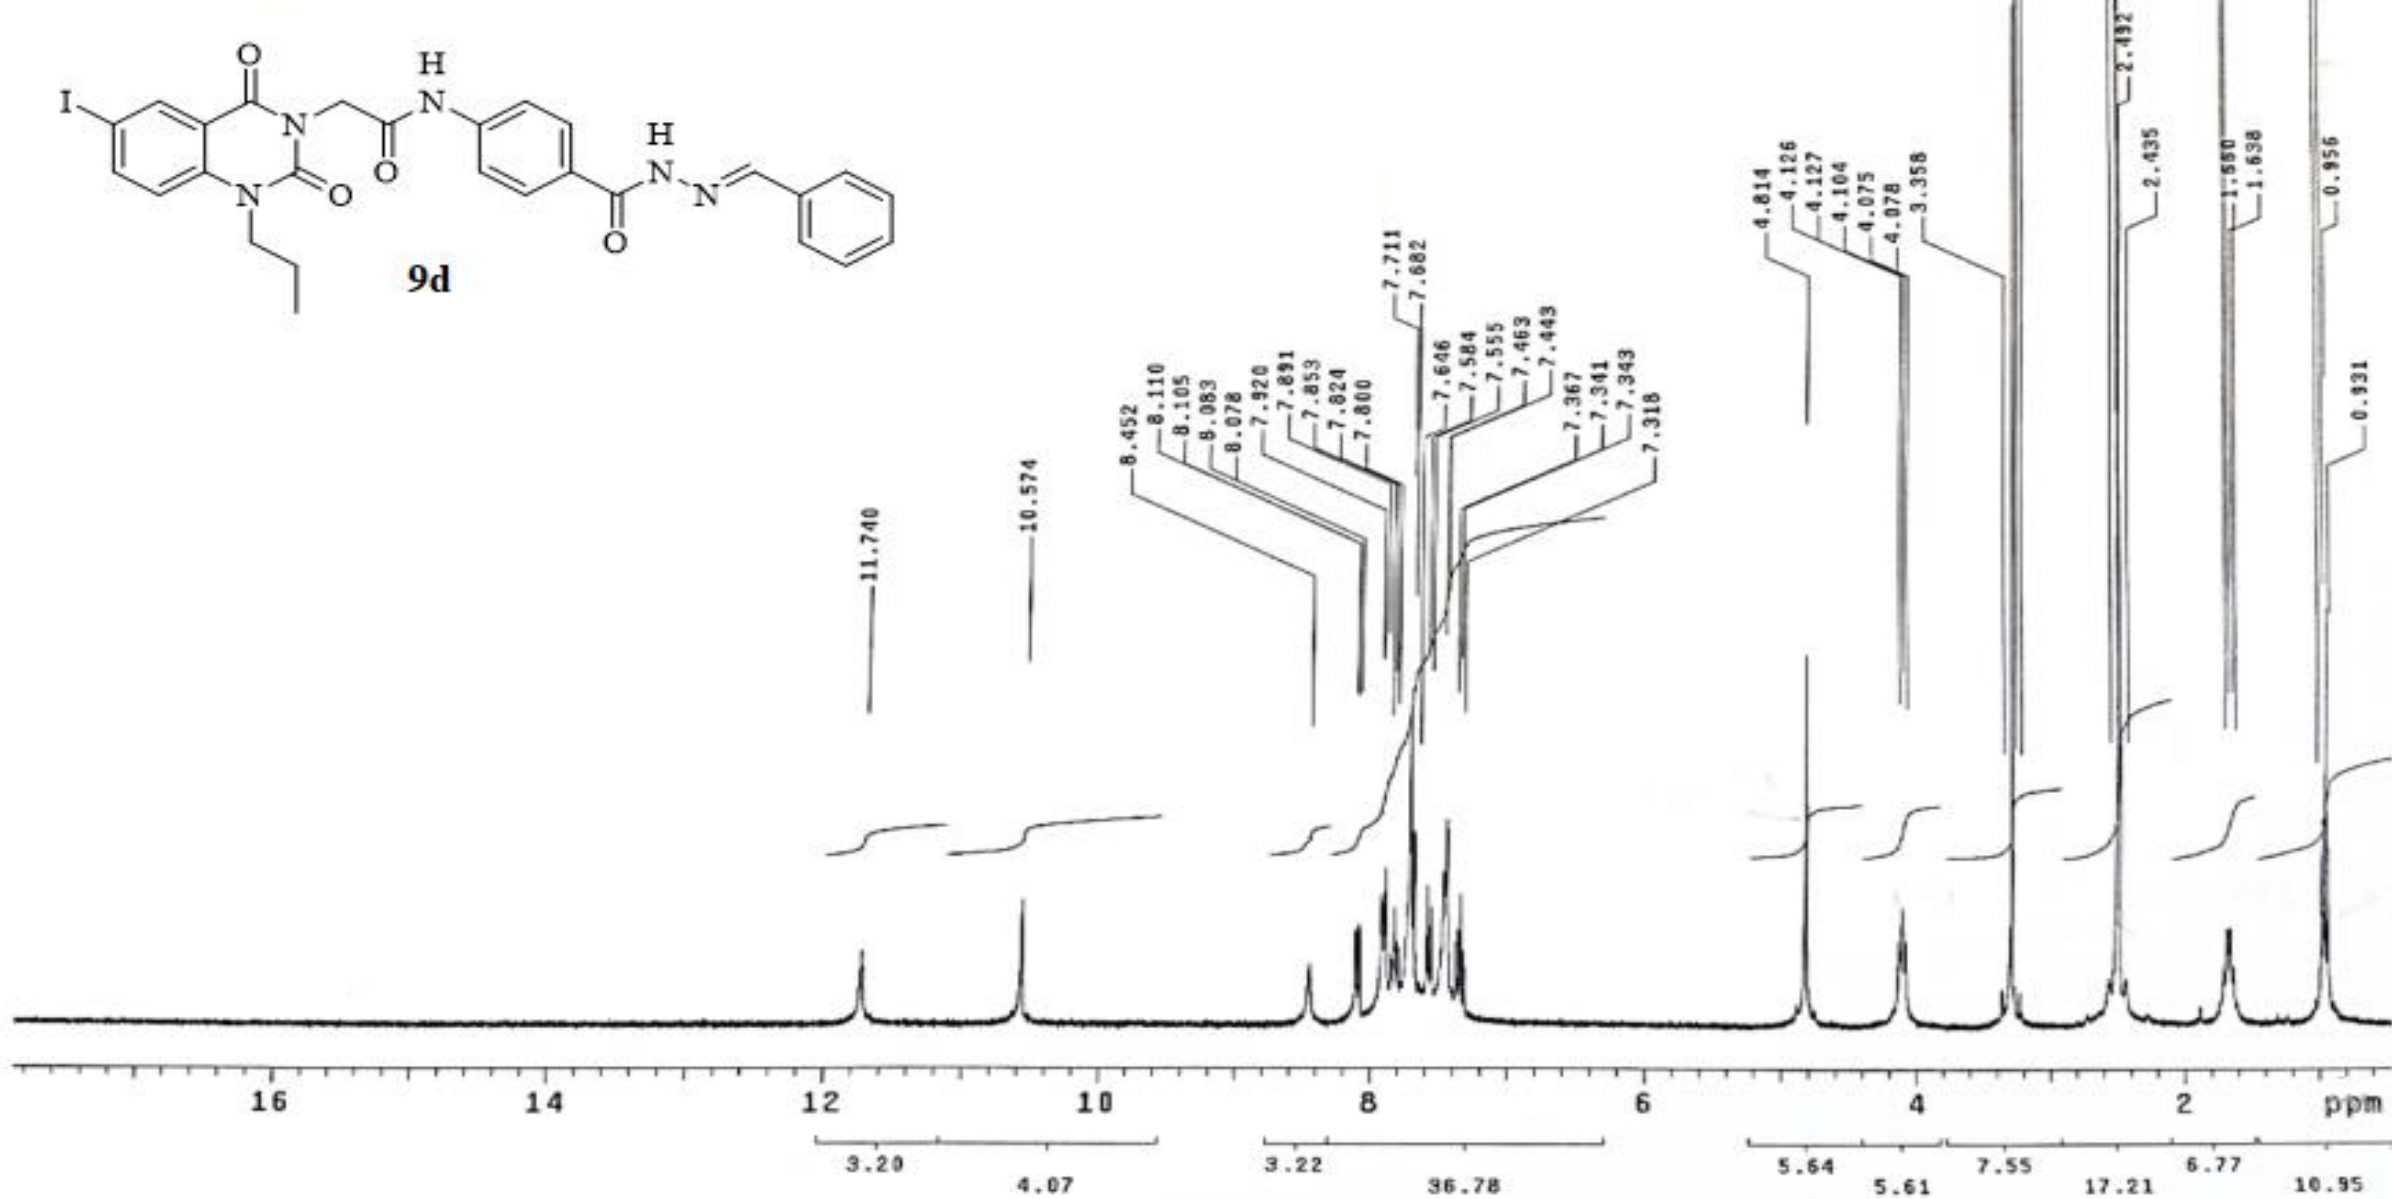



Current Data Parameters  
 NAME K-2  
 EXPNO 3  
 PROCNO 1

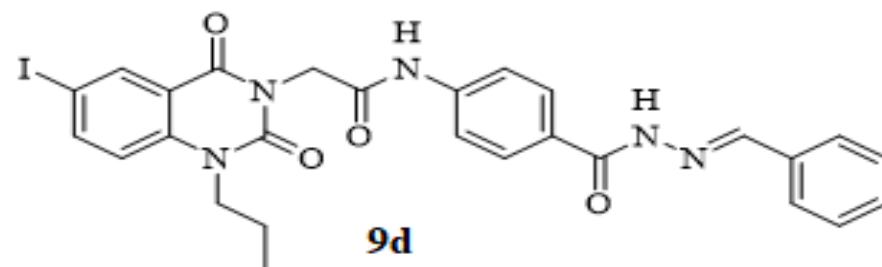

AQ 1.3631488 sec  
 RG 205.37  
 DW 20.800 usec  
 DE 6.50 usec  
 TE 300.0 K  
 D1 2.00000000 sec  
 D11 0.03000000 sec  
 TD0 1

----- CHANNEL f1 -----  
 SFO1 100.6278588 MHz  
 NUC1 13C  
 P1 10.00 usec  
 PLW1 47.00000000 W

----- CHANNEL f2 -----  
 SFO2 400.1516006 MHz  
 NUC2 1H  
 CPDPRG[2] waltz16  
 PCPD2 90.00 usec  
 PLW2 18.00000000 W  
 PLW12 0.34722000 W  
 PLW13 0.28125000 W

F2 - Processing parameters  
 SI 32768  
 SF 100.6177975 MHz  
 WDW EM  
 SSB 0  
 LB 1.00 Hz  
 GB 0  
 PC 1.40

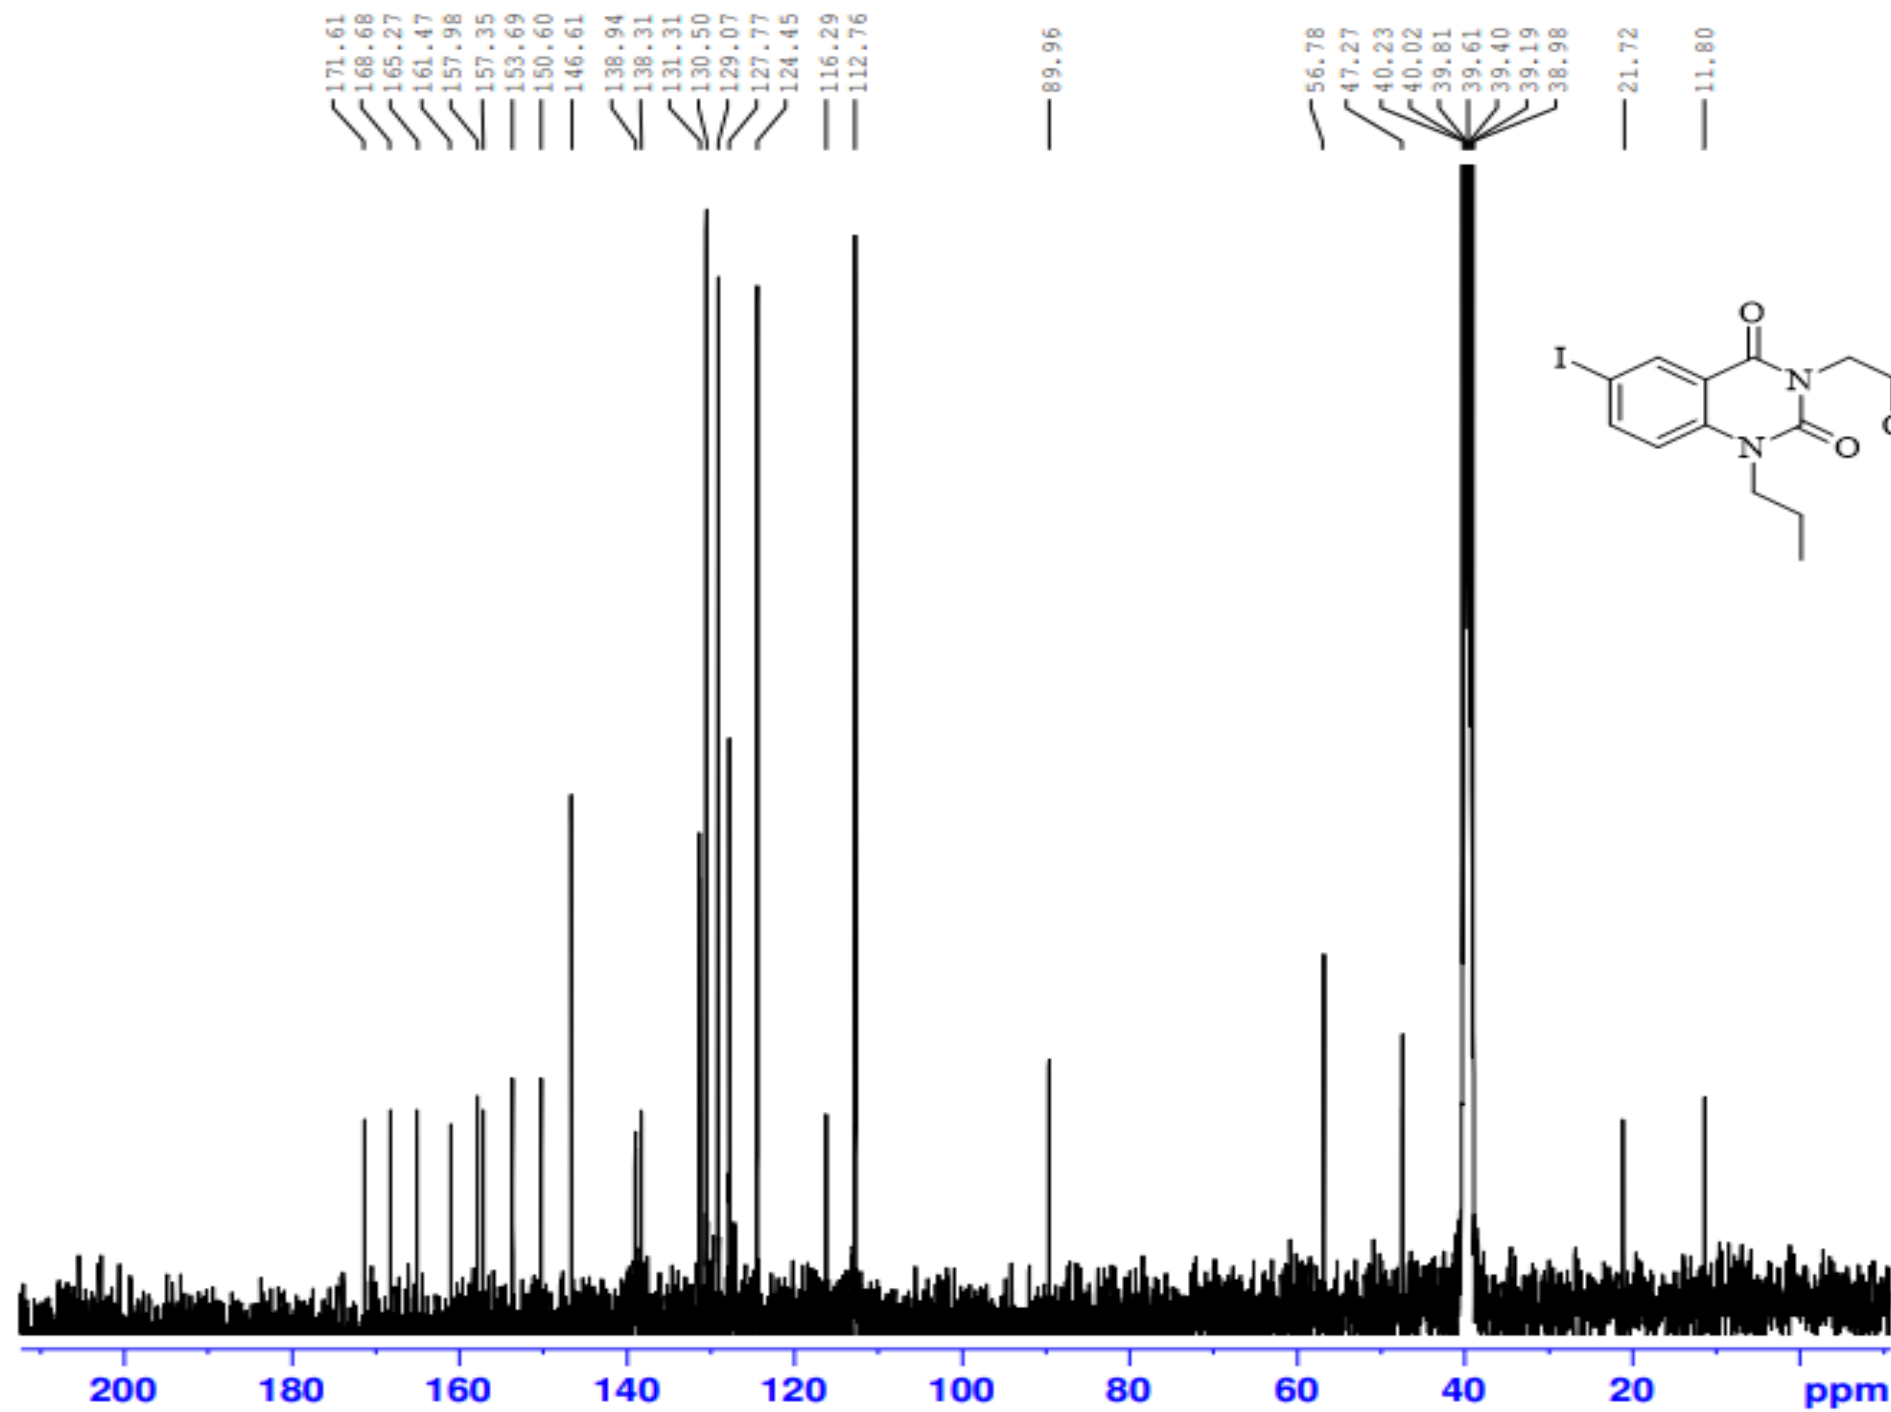

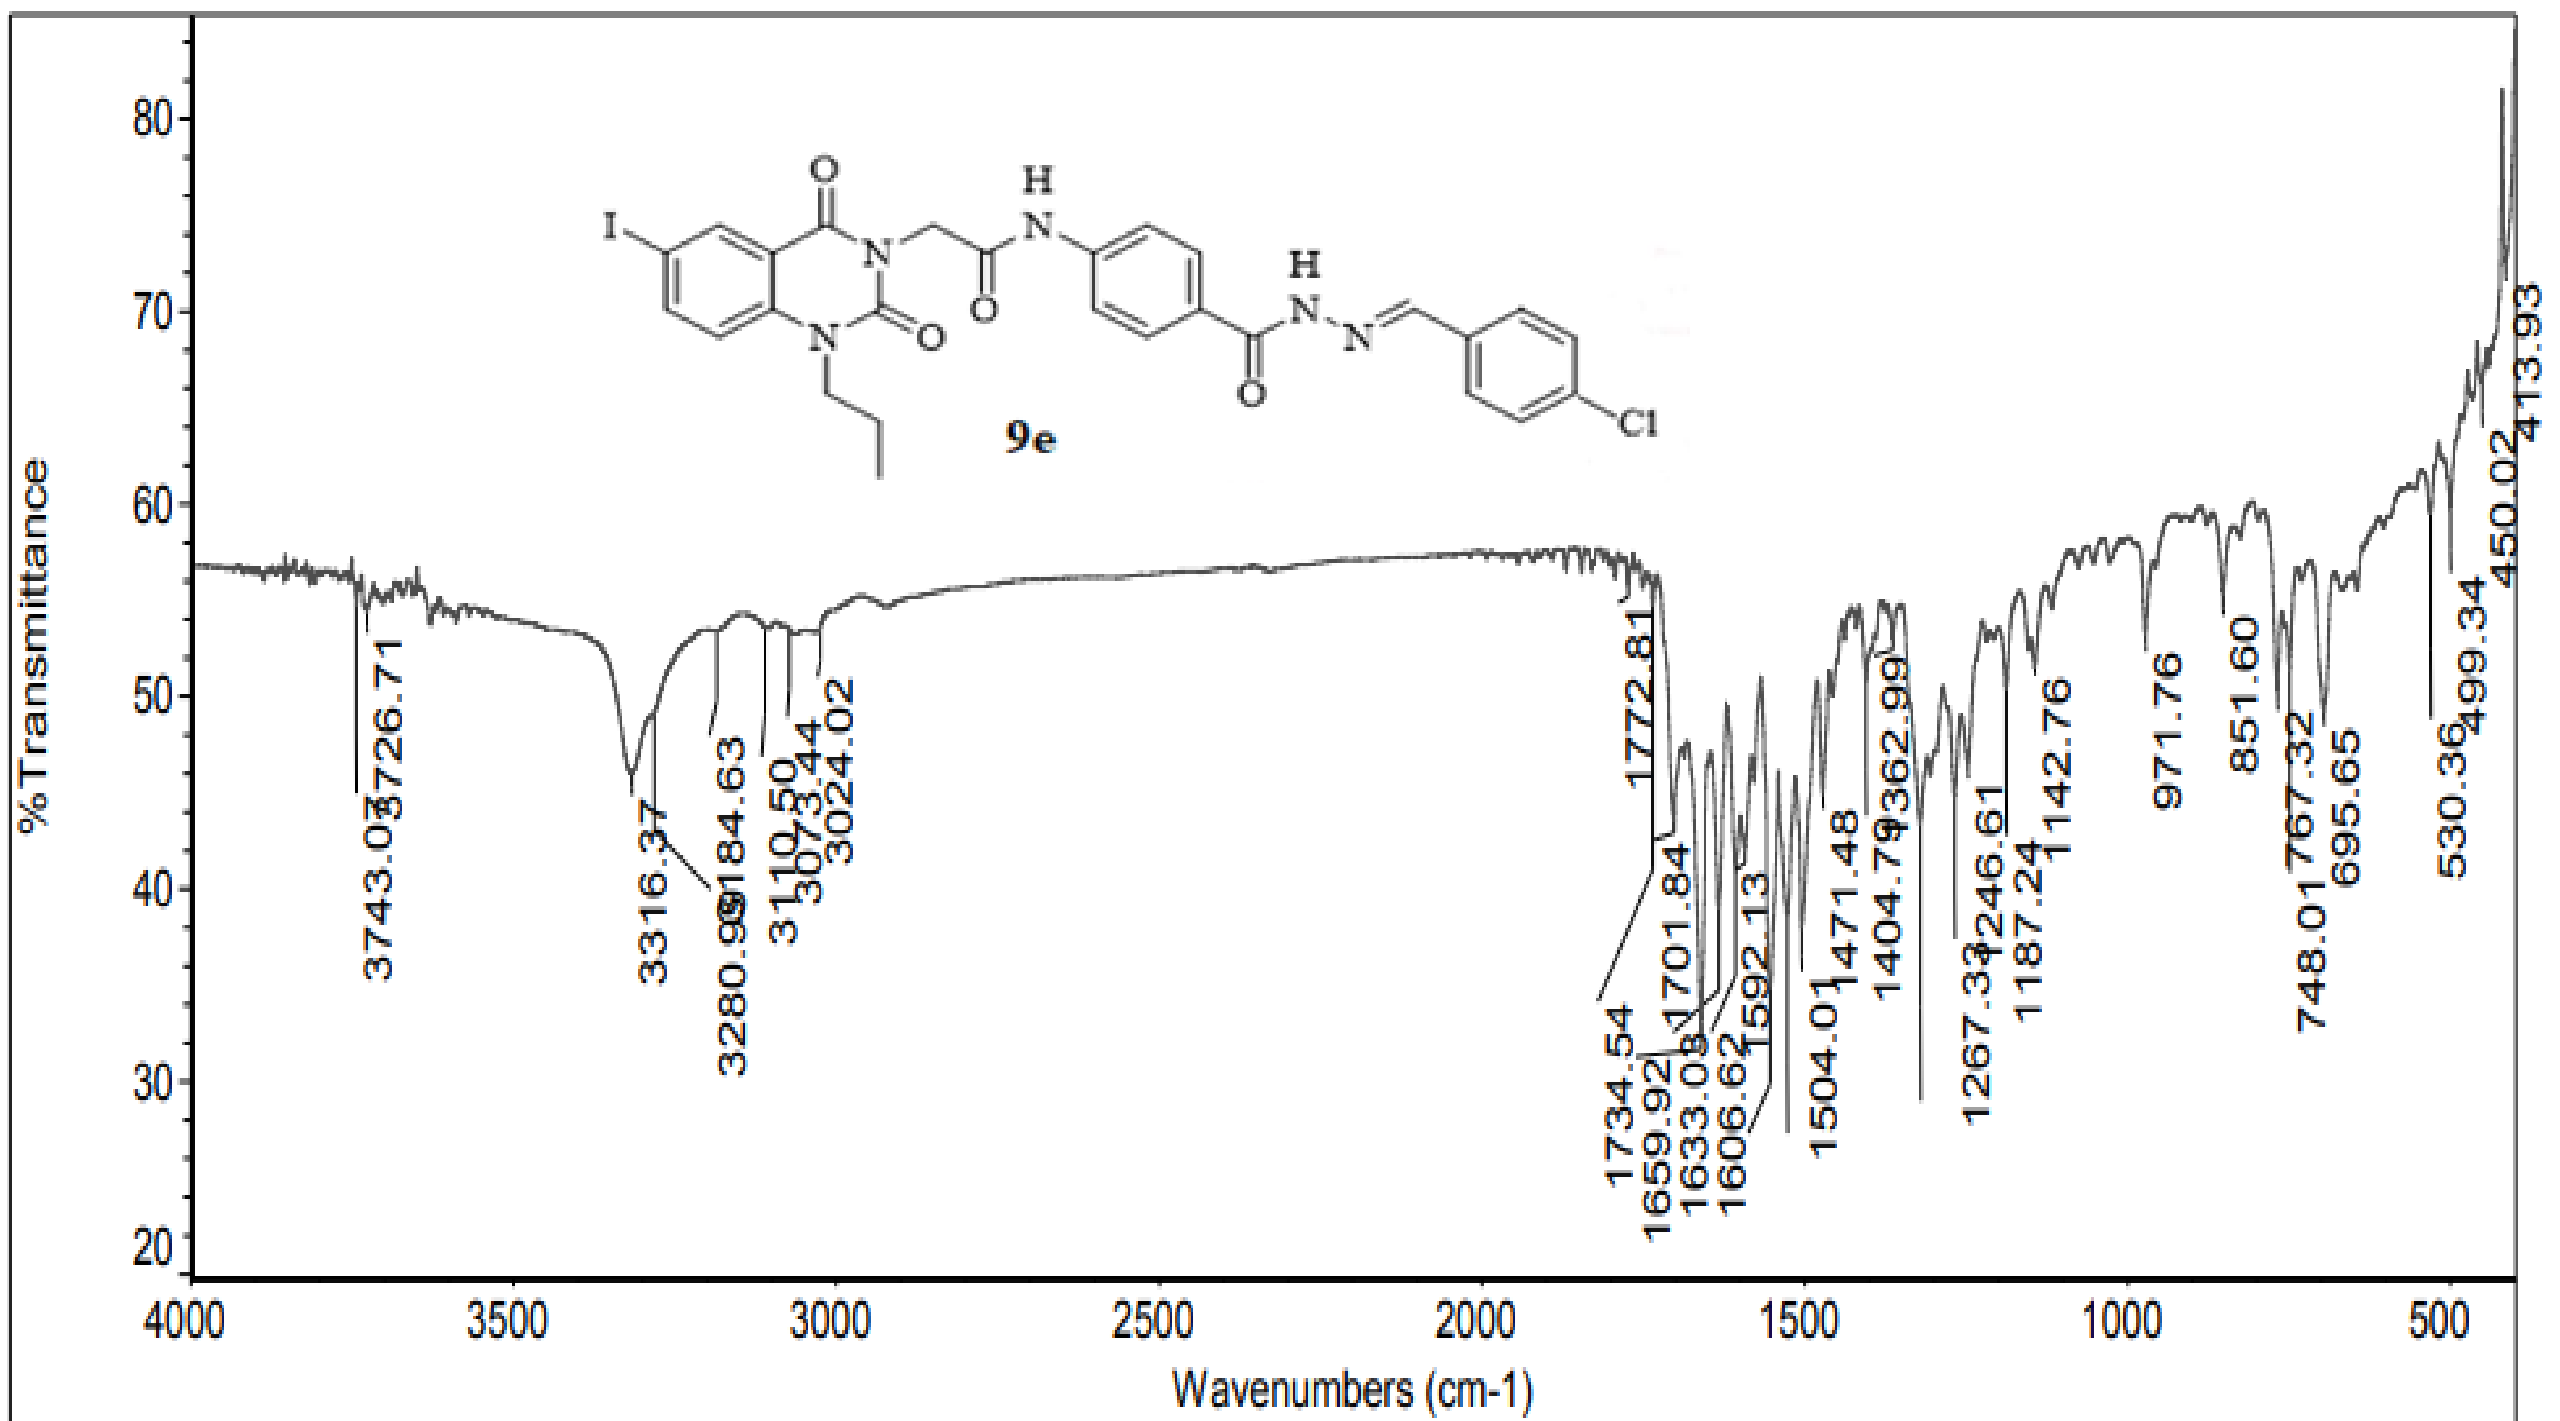

Relax. delay 1.000 sec  
 Pulse 74.1 degrees  
 Acq. time 4.004 sec  
 Width 8000.0 Hz  
 22 repetitions  
 OBSERVE M1, 300.0687875 MHz  
 DATA PROCESSING  
 FT size 65536  
 Total time 19 min, 19 sec

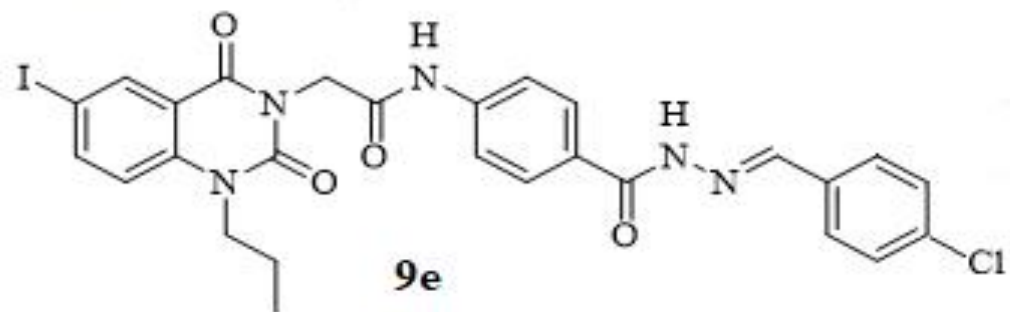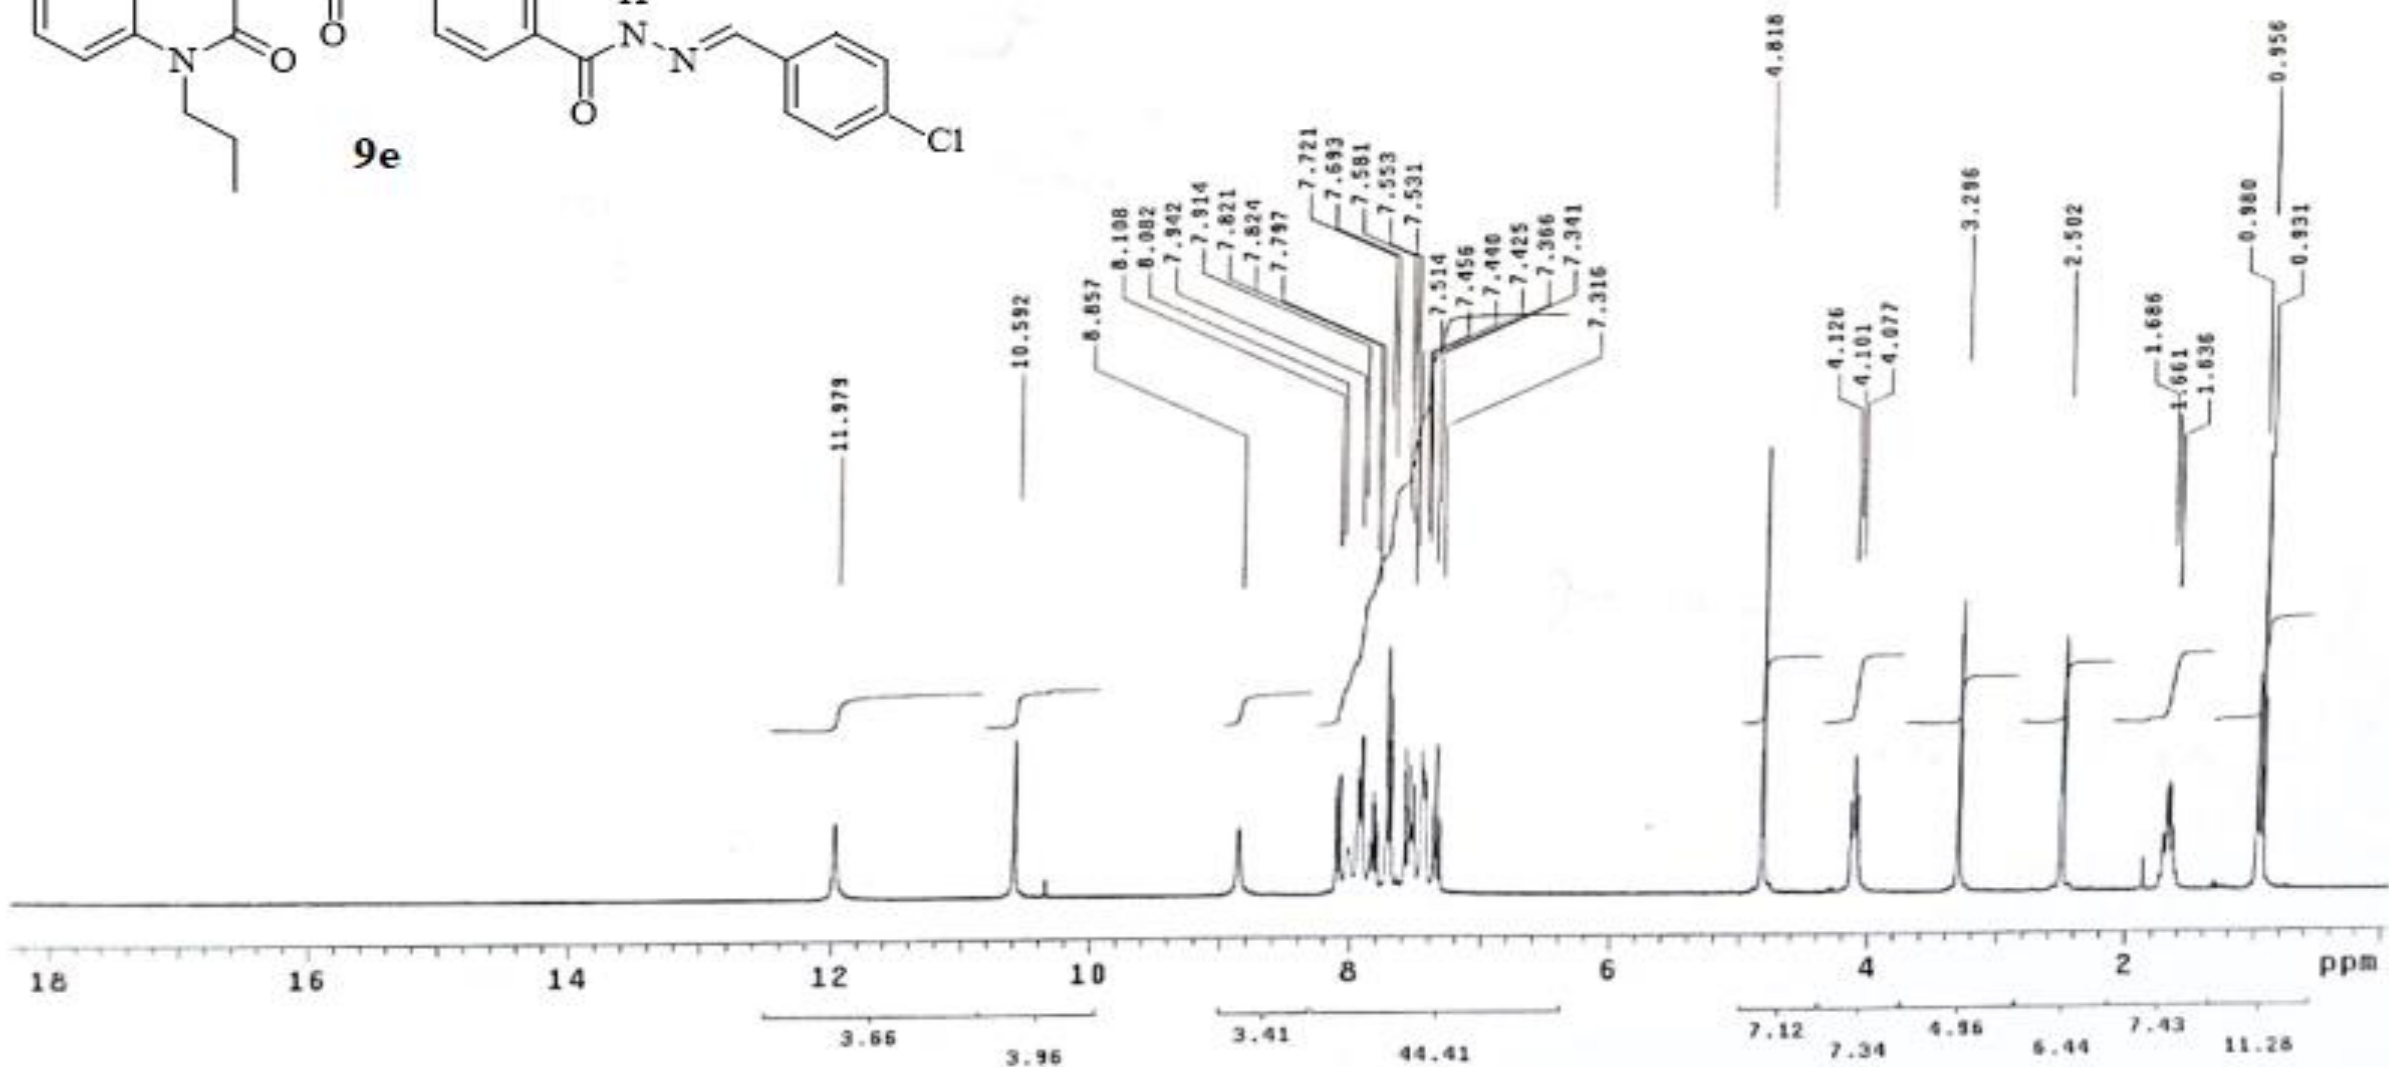

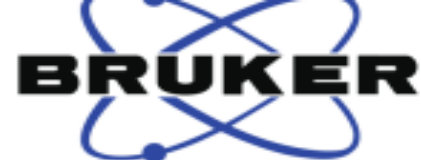

Current Data Parameters  
NAME K-3  
EXPNO 2  
PROCNO 1

169.40  
160.00  
153.18  
152.92  
152.45  
148.76  
143.45  
142.74  
131.78  
129.94  
129.89  
129.69  
125.60  
124.36  
123.62  
122.86  
122.72  
122.15  
118.94  
113.89  
96.78

54.98  
46.82  
40.26  
40.05  
39.84  
39.64  
39.43  
39.22  
39.01

21.29

10.96

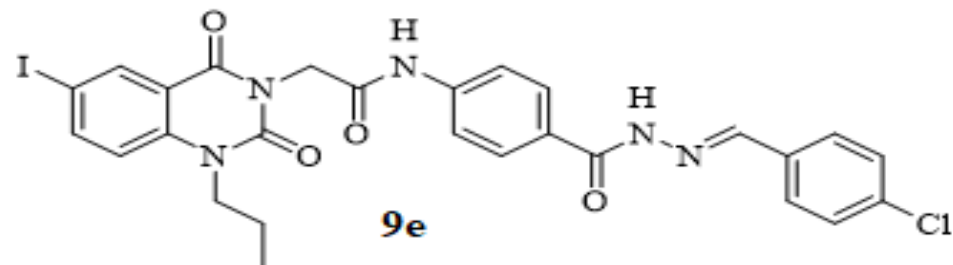

9e

AQ 1.3631488 sec  
RG 205.37  
DW 20.800 usec  
DE 6.50 usec  
TE 300.0 K  
D1 2.00000000 sec  
D11 0.03000000 sec  
TD0 1

----- CHANNEL f1 -----  
SFO1 100.6278588 MHz  
NUC1 13C  
P1 10.00 usec  
PLW1 47.00000000 W

----- CHANNEL f2 -----  
SFO2 400.1516006 MHz  
NUC2 1H  
CPDPRG[2] waltz16  
PCPD2 90.00 usec  
PLW2 18.00000000 W  
PLW12 0.34722000 W  
PLW13 0.28125000 W

F2 - Processing parameters  
SI 32768  
SF 100.6177975 MHz  
WDW EM  
SSB 0  
LB 1.00 Hz  
GB 0  
PC 1.40

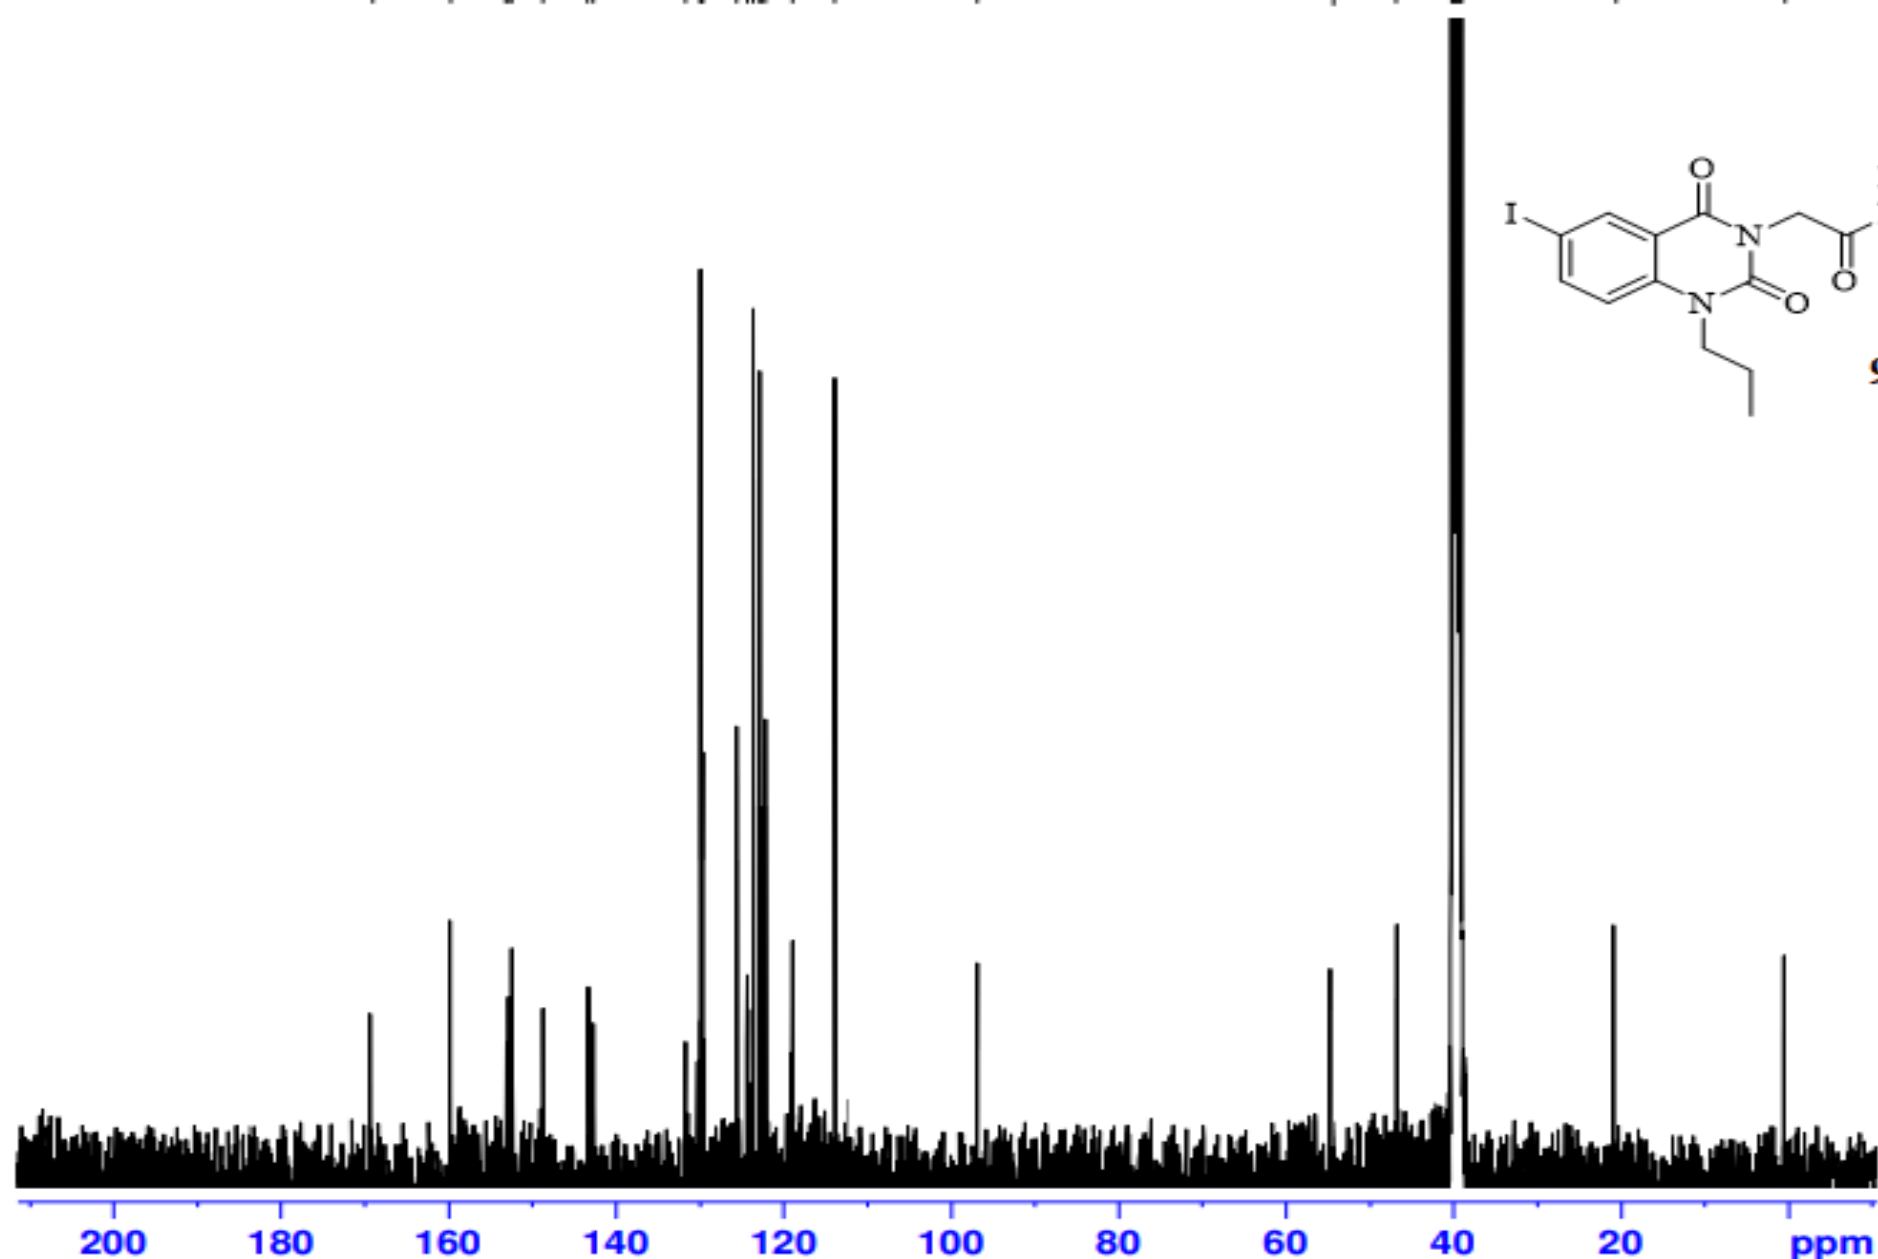

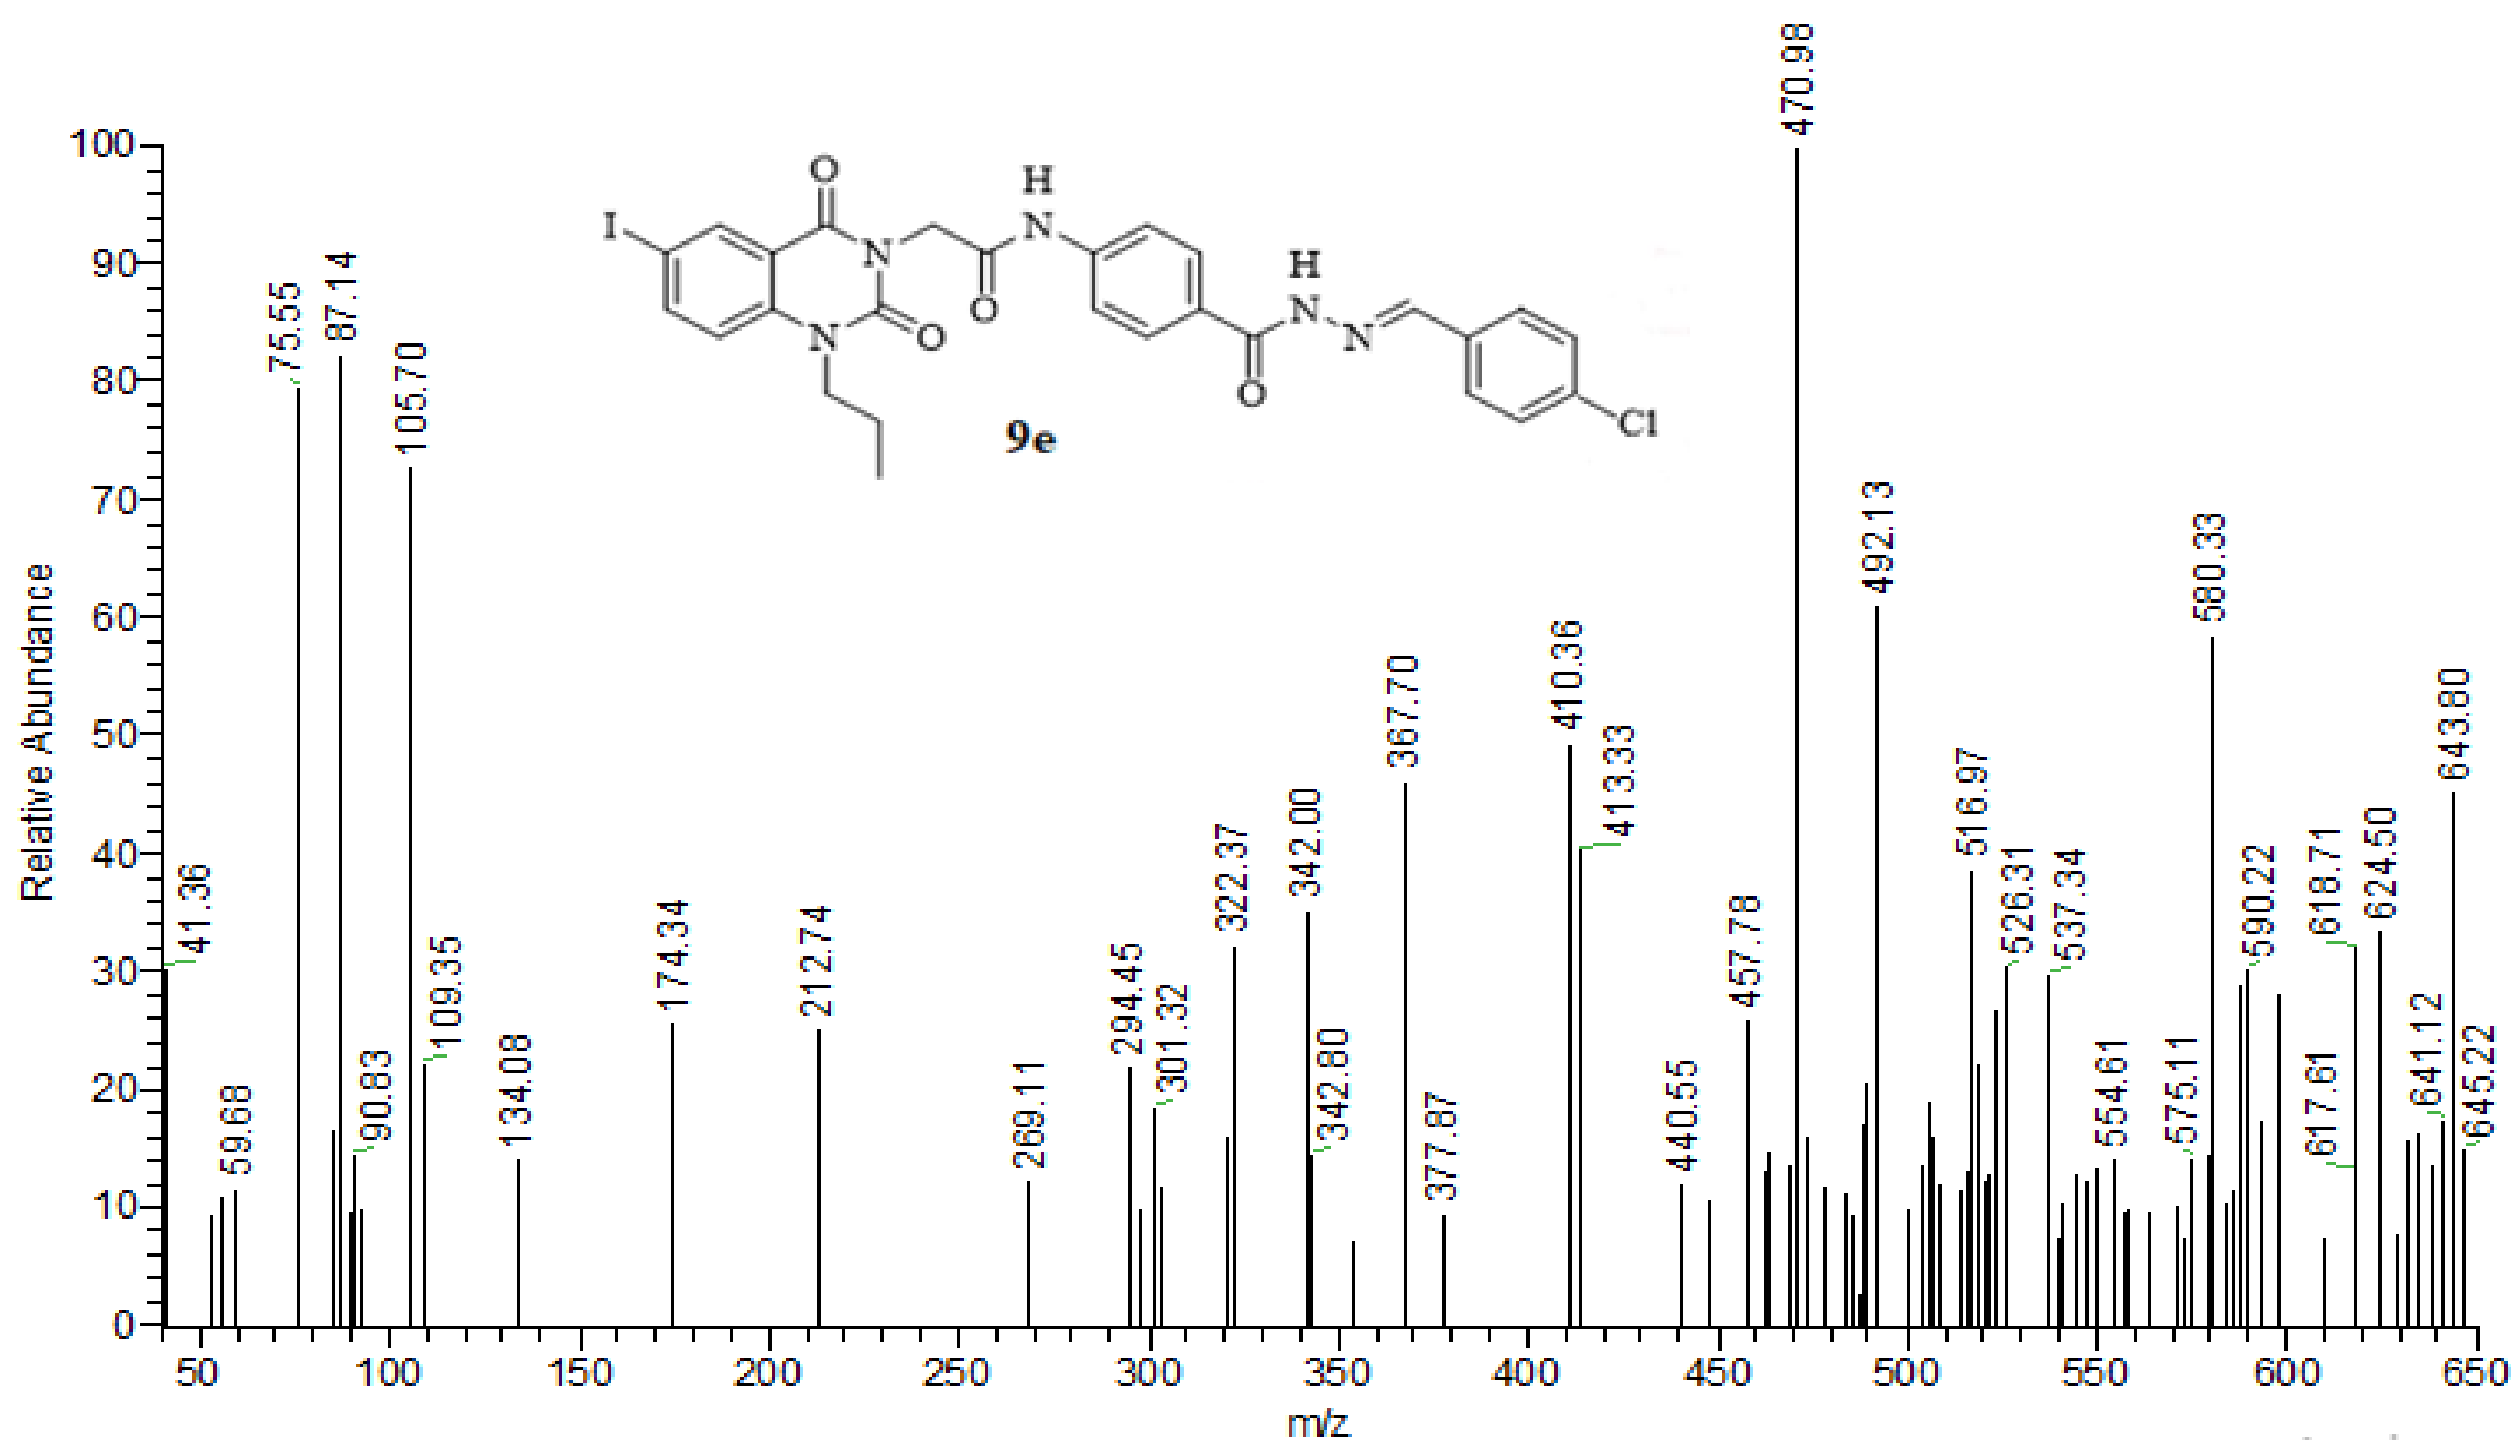

Supplement: d3ra07700d1.pdf [file d3ra07700d1.pdf]
